# Supplementary material for: Metal- and base-free reductive coupling reaction of P(O)–H with aryl/alkyl sulfonyl chlorides: a novel protocol for the construction of P–S–C bonds
Source: Royal Society of Chemistry journal article supplement (doi:10.1039/c6ob02364a), 2016-11-29
Supplement: c6ob02364a1.pdf [file c6ob02364a1.pdf]

Supporting information for

**Metal- and base-free reductive coupling reaction of P(O)-H with  
aryl/alkyl sulfonyl chlorides: a novel protocol for the construction of  
P-S-C bonds**

Dungai Wang, Jinlong Zhao, Weigang Xu, Changwei Shao, Zheng Shi, Liang Li\* and Xinghua Zhang\*

*School of Chemical and Environmental Engineering,  
Shanghai Institute of Technology, 100 Hai-Quan Road, Shanghai 201418, China.*

xhzhang@sit.edu.cn

**Contents**

|                                      |     |
|--------------------------------------|-----|
| General Information                  | S2  |
| Experimental Procedures              | S2  |
| Characterization of products         | S3  |
| Mechanistic studies                  | S12 |
| References                           | S15 |
| NMR Spectra                          | S15 |
| Crystallographic detail of <b>3k</b> | S54 |

## 1. General Information

All chemicals were obtained from commercial suppliers and used directly without further purification.  $^1\text{H}$  NMR (500 MHz) and  $^{13}\text{C}$  NMR (125 MHz) spectras were recorded on Bruker AVANCE III (500 MHz) spectrometer with  $\text{CDCl}_3$  or  $\text{DMSO}-d_6$  as solvents. The chemical shifts  $\delta$  are reported in ppm relative to tetra-methylsilane. Reference peaks for chloroform in  $^1\text{H}$  NMR and  $^{13}\text{C}$  NMR spectra were set at 7.26 ppm and 77.0 ppm, and for  $\text{DMSO}-d_6$  ( $^1\text{H}$  NMR: TMS at 0.00 ppm, DMSO at 2.50 ppm;  $^{13}\text{C}$  NMR: DMSO at 40.0 ppm). High resolution mass spectras (HRMS) were obtained on Bruker solariX 70 FT-MS apparatus. Melting points were determined on a WRS-1B melting point apparatus and were uncorrected.

## 2. Experimental Procedure:

### Typical Procedure for Method A

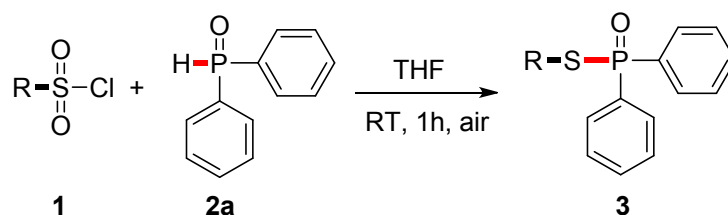

R = aryl, alkyl

Compound **1**, aryl/alkyl sulfonyl chlorides (0.5 mmol) and **2a**, diphenylphosphine oxide (1.5 mmol) were added to a glass tube, and then 1.5 mL of THF was added. The reaction mixture was stirred at room temperature for 1 h. After completion of the reaction, the mixture was concentrated under reduced pressure, and the residue was purified by flash column chromatography using petroleum ether/ethyl acetate as the eluent to give the pure product **3**.

### Typical Procedure for Method B

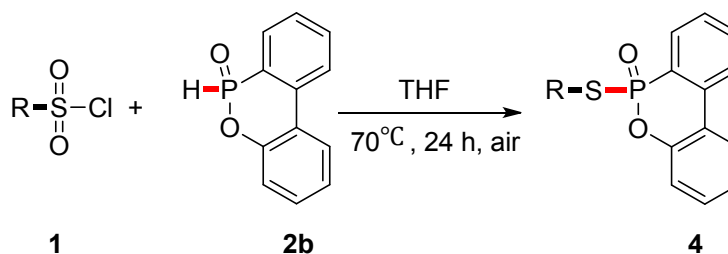

R = aryl, alkyl

Compound **1**, aryl/alkyl sulfonyl chlorides (0.5 mmol) and **2a**, 6H-dibenzo[c, e][1, 2]oxophosphinine 6-oxide (1.5 mmol) were added to a glass tube, and then 1.5 mL of THF was added. The reaction mixture was stirred at 70 °C for 24 h. After completion of

the reaction, the mixture was concentrated under reduced pressure, and the residue was purified by flash column chromatography using petroleum ether/ethyl acetate as the eluent to give the corresponding product **4**.

### 3. Characterization of products

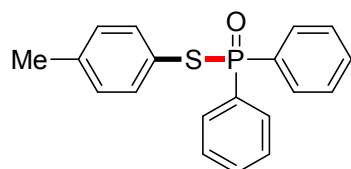

#### **S-p-tolyl diphenylphosphinothioate**

**3a<sup>1</sup>**: White solid, m.p. 113.8-115.1 °C; <sup>1</sup>H NMR (500 MHz, CDCl<sub>3</sub>): δ 7.87-7.83 (m, 4H), 7.52-7.49 (m, 2H), 7.45-7.42 (m, 4H), 7.32 (d, *J* = 7.3 Hz, 2H), 7.00 (d, *J* = 7.9 Hz, 2H), 2.25 (s, 3H); <sup>13</sup>C NMR (125 MHz, CDCl<sub>3</sub>): δ 139.1 (d, *J* = 2.5 Hz), 135.3 (d, *J* = 3.8 Hz), 132.6 (d, *J* = 106.4 Hz), 132.2, 131.6 (d, *J* = 10.2 Hz), 129.9, 128.4 (d, *J* = 13.1 Hz), 122.2 (d, *J* = 5.0 Hz), 21.1; <sup>31</sup>P NMR (202 MHz, CDCl<sub>3</sub>): δ 41.28; HRMS: *m/z* [M+H]<sup>+</sup> calcd for C<sub>19</sub>H<sub>18</sub>OPS<sup>+</sup>: 325.0810, found: 325.0811.

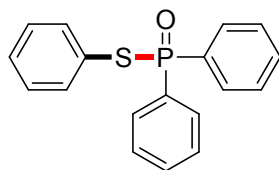

#### **S-phenyl diphenylphosphinothioate**

**3b<sup>2</sup>**: White solid, m.p. 86.6-87.5 °C; <sup>1</sup>H NMR (500 MHz, CDCl<sub>3</sub>): δ 7.88-7.82 (m, 4H), 7.48-7.38 (m, 8H), 7.22-7.15 (m, 3H); <sup>13</sup>C NMR (125 MHz, CDCl<sub>3</sub>): δ 135.2 (d, *J* = 3.7 Hz), 132.4 (d, *J* = 106.3 Hz), 132.1 (d, *J* = 3.1 Hz), 131.4 (d, *J* = 10.1 Hz), 128.9, 128.7, 128.3 (d, *J* = 13.2 Hz), 126.0 (d, *J* = 4.6 Hz); <sup>31</sup>P NMR (202 MHz, CDCl<sub>3</sub>): δ 40.16; HRMS: *m/z* [M+H]<sup>+</sup> calcd for C<sub>18</sub>H<sub>16</sub>OPS<sup>+</sup>: 311.0654, found: 311.0652.

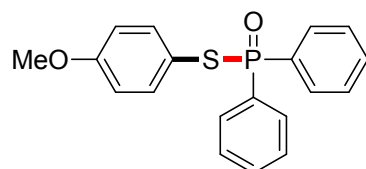

#### **S-(4-methoxyphenyl)diphenylphosphinothioate**

**3c<sup>1</sup>**: White solid, m.p. 142.9-143.8 °C; <sup>1</sup>H NMR (500 MHz, CDCl<sub>3</sub>): δ 7.86-7.82 (m, 4H), 7.52-7.49 (m, 2H), 7.45-7.42 (m, 4H), 7.34-7.32 (m, 2H), 6.73 (d, *J* = 8.7 Hz, 2H), 3.72 (s, 3H); <sup>13</sup>C NMR (125 MHz, CDCl<sub>3</sub>): δ 160.4, 137.0 (d, *J* = 3.4 Hz), 132.6 (d, *J* = 107.8 Hz), 132.2 (d, *J* = 2.8 Hz), 131.6 (d, *J* = 10.2 Hz), 128.4 (d, *J* = 13.1 Hz), 116.0

(d,  $J = 4.8$  Hz), 114.7 (d,  $J = 1.7$  Hz), 55.2;  $^{31}\text{P}$  NMR (202 MHz,  $\text{CDCl}_3$ ):  $\delta$  41.34; HRMS:  $m/z$   $[\text{M}+\text{H}]^+$  calcd for  $\text{C}_{19}\text{H}_{18}\text{O}_2\text{PS}^+$ : 341.0760, found: 341.0763.

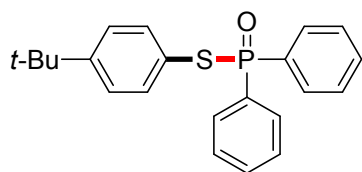

### **S-(4-(*tert*-butyl)phenyl)diphenylphosphinothioate**

**3d<sup>3</sup>**: White solid, m.p. 123.4-124.4 °C;  $^1\text{H}$  NMR (500 MHz,  $\text{CDCl}_3$ ):  $\delta$  7.86-7.82 (m, 4H), 7.48-7.45 (m, 2H), 7.42-7.38 (m, 4H), 7.37-7.35 (m, 2H), 7.20 (d,  $J = 8.0$  Hz, 2H), 1.22 (s, 9H);  $^{13}\text{C}$  NMR (125 MHz,  $\text{CDCl}_3$ ):  $\delta$  152.0 (d,  $J = 2.4$  Hz), 135.0 (d,  $J = 3.5$  Hz), 132.6 (d,  $J = 105.7$  Hz), 132.0, 131.4 (d,  $J = 10.2$  Hz), 128.3 (d,  $J = 13.1$  Hz), 126.1, 122.2, 34.4, 31.0;  $^{31}\text{P}$  NMR (202 MHz,  $\text{CDCl}_3$ ):  $\delta$  41.44; HRMS:  $m/z$   $[\text{M}+\text{H}]^+$  calcd for  $\text{C}_{22}\text{H}_{23}\text{OPS}^+$ : 367.1280, found: 367.1282.

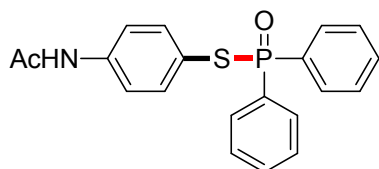

### **S-(4-acetamidophenyl)diphenylphosphinothioate**

**3e<sup>1</sup>**: White solid, m.p. 188.0-188.3 °C;  $^1\text{H}$  NMR (500 MHz,  $\text{CDCl}_3$ ):  $\delta$  9.86 (s, 1H), 7.85-7.81 (m, 4H), 7.58-7.54 (m, 2H), 7.49-7.44 (m, 6H), 7.20 (d,  $J = 6.9$  Hz, 2H), 2.13 (s, 3H);  $^{13}\text{C}$  NMR (125 MHz,  $\text{CDCl}_3$ ):  $\delta$  169.5, 140.4, 136.3 (d,  $J = 3.2$  Hz), 132.6, 132.1 (d,  $J = 104.5$  Hz), 131.4 (d,  $J = 10.3$  Hz), 128.7 (d,  $J = 13.0$  Hz), 120.3, 117.8 (d,  $J = 2.2$  Hz), 24.5;  $^{31}\text{P}$  NMR (202 MHz,  $\text{CDCl}_3$ ):  $\delta$  42.73; HRMS:  $m/z$   $[\text{M}+\text{H}]^+$  calcd for  $\text{C}_{20}\text{H}_{19}\text{NO}_2\text{PS}^+$ : 368.0869, found: 368.0864.

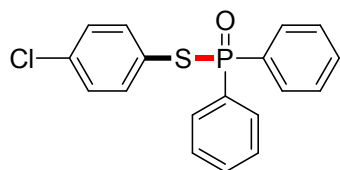

### **S-(4-chlorophenyl)diphenylphosphinothioate**

**3f<sup>4</sup>**: White solid, m.p. 90.3-92.3 °C;  $^1\text{H}$  NMR (500 MHz,  $\text{CDCl}_3$ ):  $\delta$  7.86-7.82 (m, 4H), 7.54-7.51 (m, 2H), 7.47-7.43 (m, 4H), 7.39-7.37 (m, 2H), 7.18-7.16 (m, 2H);  $^{13}\text{C}$  NMR (125 MHz,  $\text{CDCl}_3$ ):  $\delta$  136.4 (d,  $J = 3.7$  Hz), 135.5 (d,  $J = 2.5$  Hz), 132.4 (d,  $J = 1.8$  Hz), 132.1 (d,  $J = 106.1$  Hz), 131.5 (d,  $J = 10.3$  Hz), 129.2, 128.6 (d,  $J = 13.2$  Hz), 124.6 (d,  $J = 5.0$  Hz);  $^{31}\text{P}$  NMR (202 MHz,  $\text{CDCl}_3$ ):  $\delta$  40.65; HRMS:  $m/z$   $[\text{M}+\text{H}]^+$  calcd for  $\text{C}_{18}\text{H}_{15}\text{ClOPS}^+$ : 345.0264, found: 345.0268.

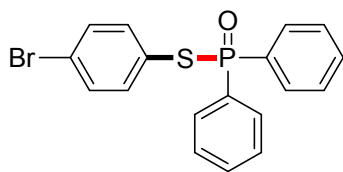

### **S-(4-bromophenyl)diphenylphosphinothioate**

**3g:** White solid, m.p. 171.7-173.4 °C; <sup>1</sup>H NMR (500 MHz, CDCl<sub>3</sub>): δ 7.86-7.82 (m, 4H), 7.54-7.51 (m, 2H), 7.47-7.43 (m, 4H), 7.34-7.30 (m, 4H); <sup>13</sup>C NMR (125 MHz, CDCl<sub>3</sub>): δ 136.7 (d, *J* = 3.8 Hz), 132.5, 132.2, 132.1 (d, *J* = 105.9 Hz), 131.5 (d, *J* = 10.3 Hz), 128.6 (d, *J* = 13.2 Hz), 125.3 (d, *J* = 4.6 Hz), 123.7; <sup>31</sup>P NMR (202 MHz, CDCl<sub>3</sub>): δ 40.46; HRMS: *m/z* [M+H]<sup>+</sup> calcd for C<sub>18</sub>H<sub>15</sub>BrOPS<sup>+</sup>: 390.9739, found: 390.9743.

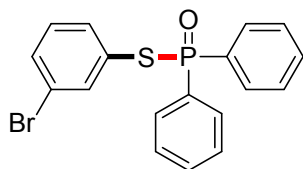

### **S-(3-bromophenyl)diphenylphosphinothioate.**

**3h<sup>4</sup>:** White solid, m.p. 190.4-191.2 °C; <sup>1</sup>H NMR (500 MHz, CDCl<sub>3</sub>): δ 7.86-7.82 (m, 4H), 7.55-7.52 (m, 3H), 7.48-7.43 (m, 5H), 7.38-7.36 (m, 1H), 7.09-7.06 (m, 1H); <sup>13</sup>C NMR (125 MHz, CDCl<sub>3</sub>): δ 137.6 (d, *J* = 3.9 Hz), 133.8 (d, *J* = 3.6 Hz), 132.5, 132.0 (d, *J* = 110.4 Hz), 132.0, 131.5 (d, *J* = 10.3 Hz), 130.2, 128.6 (d, *J* = 13.2 Hz), 128.3 (d, *J* = 4.9 Hz), 122.4 (d, *J* = 1.7 Hz); <sup>31</sup>P NMR (202 MHz, CDCl<sub>3</sub>): δ 40.75; HRMS: *m/z* [M+H]<sup>+</sup> calcd for C<sub>18</sub>H<sub>15</sub>BrOPS<sup>+</sup>: 390.9739, found: 390.9742.

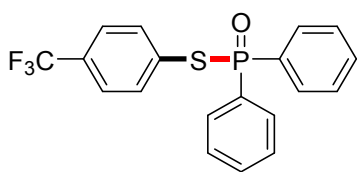

### **S-(4-(trifluoromethyl)phenyl)diphenylphosphinothioate**

**3i:** White solid, m.p. 189.9-190.6 °C; <sup>1</sup>H NMR (500 MHz, CDCl<sub>3</sub>): δ 7.88-7.84 (m, 4H), 7.60 (d, *J* = 7.9 Hz, 2H), 7.55-7.52 (m, 2H), 7.48-7.44 (m, 6H); <sup>13</sup>C NMR (125 MHz, CDCl<sub>3</sub>): δ 135.9, 134.8, 132.3 (d, *J* = 107.3 Hz), 131.9 (d, *J* = 2.7 Hz), 131.4 (d, *J* = 10.0 Hz), 128.9 (d, *J* = 12.5 Hz), 127.3, 126.8 (d, *J* = 4.1 Hz), 124.5 (q, *J* = 270.0 Hz); <sup>31</sup>P NMR (202 MHz, CDCl<sub>3</sub>): δ 40.94; HRMS: *m/z* [M+H]<sup>+</sup> calcd for C<sub>19</sub>H<sub>15</sub>F<sub>3</sub>OPS<sup>+</sup>: 379.0528, found: 379.0530.

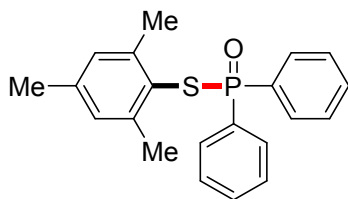

### **S-(2,4,6-trimethylphenyl)diphenylphosphinothioate**

**3j**: White solid, m.p. 95.3-96.7°C;  $^1\text{H}$  NMR (500 MHz,  $\text{CDCl}_3$ ):  $\delta$  7.78-7.74 (m, 4H), 7.52-7.49 (m, 2H), 7.43-7.39 (m, 4H), 6.83(s, 2H), 2.25 (s, 6H), 2.22 (s, 3H);  $^{13}\text{C}$  NMR (125 MHz,  $\text{CDCl}_3$ ):  $\delta$  144.7 (d,  $J = 3.5$  Hz), 139.2 (d,  $J = 2.0$  Hz), 133.3 (d,  $J = 104.8$  Hz), 132.1, 131.2 (d,  $J = 10.2$  Hz), 129.2 (d,  $J = 2.1$  Hz), 128.3 (d,  $J = 12.9$  Hz), 120.7 (d,  $J = 5.5$  Hz), 22.3, 20.9;  $^{31}\text{P}$  NMR (202 MHz,  $\text{CDCl}_3$ ):  $\delta$  38.24; HRMS:  $m/z$   $[\text{M}+\text{H}]^+$  calcd for  $\text{C}_{21}\text{H}_{22}\text{OPS}^+$ : 353.1124, found: 353.1119.

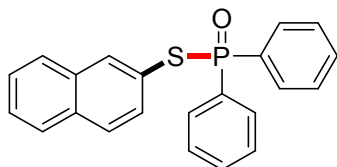

### **S-naphthalen-2-yl diphenylphosphinothioate**

**3k**<sup>1</sup>: White solid, m.p. 96.3-96.7°C;  $^1\text{H}$  NMR (500 MHz,  $\text{CDCl}_3$ ):  $\delta$  7.99 (s, 1H), 7.90-7.86 (m, 4H), 7.74-7.69 (m, 2H), 7.65 (d,  $J = 8.5$  Hz, 1H), 7.51-7.47 (m, 3H), 7.45-7.41 (m, 6H);  $^{13}\text{C}$  NMR (125 MHz,  $\text{CDCl}_3$ ):  $\delta$  135.3 (d,  $J = 4.9$  Hz), 133.5, 132.9, 132.5 (d,  $J = 103.3$  Hz), 132.3 (d,  $J = 2.6$  Hz), 131.6 (d,  $J = 10.3$  Hz), 131.5 (d,  $J = 3.0$  Hz), 128.6, 128.5 (d,  $J = 13.1$  Hz), 127.8, 127.6, 126.8, 126.4, 123.5 (d,  $J = 5.5$  Hz);  $^{31}\text{P}$  NMR (202 MHz,  $\text{CDCl}_3$ ):  $\delta$  41.48; HRMS:  $m/z$   $[\text{M}+\text{H}]^+$  calcd for  $\text{C}_{22}\text{H}_{18}\text{OPS}^+$ : 361.0810, found: 361.0813.

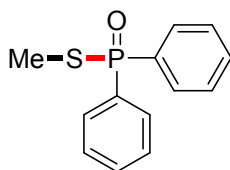

### **S-methyl diphenylphosphinothioate**

**3l**: Colorless oil;  $^1\text{H}$  NMR (500 MHz,  $\text{CDCl}_3$ ):  $\delta$  7.91-7.86 (m, 4H), 7.53-7.49 (m, 2H), 7.48-7.44 (m, 4H), 2.21 (d,  $J = 12.1$  Hz, 1H);  $^{13}\text{C}$  NMR (125 MHz,  $\text{CDCl}_3$ ):  $\delta$  132.3 (d,  $J = 106.4$  Hz), 132.0 (d,  $J = 2.8$  Hz), 131.0 (d,  $J = 10.4$  Hz), 128.3 (d,  $J = 13.0$  Hz), 10.2 (d,  $J = 2.6$  Hz);  $^{31}\text{P}$  NMR (202 MHz,  $\text{CDCl}_3$ ):  $\delta$  44.07; HRMS:  $m/z$   $[\text{M}+\text{H}]^+$  calcd for  $\text{C}_{13}\text{H}_{14}\text{OPS}^+$ : 249.0497, found: 249.0496.

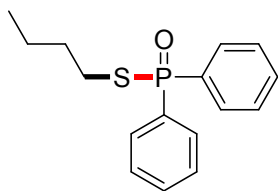

### S-1-butyl diphenylphosphinothioate

**3m<sup>4</sup>**: Colorless oil; <sup>1</sup>H NMR (500 MHz, CDCl<sub>3</sub>): δ 7.91-7.87 (m, 4H), 7.52-7.49 (m, 2H), 7.48-7.43 (m, 4H), 2.83-2.77 (m, 2H), 1.62-1.58 (m, 2H), 1.36-1.33 (m, 2H), 0.84-0.81 (m, 3H); <sup>13</sup>C NMR (125 MHz, CDCl<sub>3</sub>): δ 133.3 (d, *J* = 106.5 Hz), 132.0 (d, *J* = 2.9 Hz), 131.2 (d, *J* = 10.4 Hz), 128.4 (d, *J* = 13.2 Hz), 32.4 (d, *J* = 4.8 Hz), 28.8 (d, *J* = 2.3 Hz), 21.5, 13.2; <sup>31</sup>P NMR (202 MHz, CDCl<sub>3</sub>): δ 41.65; HRMS: *m/z* [M+H]<sup>+</sup> calcd for C<sub>16</sub>H<sub>20</sub>OPS<sup>+</sup>: 290.0967, found: 290.0967.

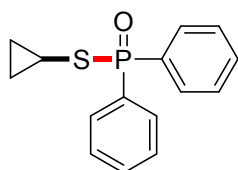

### S-cyclopropyl diphenylphosphinothioate

**3n**: Colorless oil; <sup>1</sup>H NMR (500 MHz, CDCl<sub>3</sub>): δ 7.90 (dd, *J* = 12.9, 7.6 Hz, 4H), 7.54-7.45 (m, 6H), 1.97-1.92 (m, 1H), 0.80-0.77 (m, 2H), 0.69-0.65 (m, 2H); <sup>13</sup>C NMR (125 MHz, CDCl<sub>3</sub>): δ 133.2 (d, *J* = 105.7 Hz), 132.1 (d, *J* = 2.9 Hz), 131.3 (d, *J* = 10.4 Hz), 128.5 (d, *J* = 13.0 Hz), 9.2 (d, *J* = 2.8 Hz), 7.5 (d, *J* = 5.5 Hz); <sup>31</sup>P NMR (202 MHz, CDCl<sub>3</sub>): δ 42.45; HRMS: *m/z* [M+H]<sup>+</sup> calcd for C<sub>15</sub>H<sub>16</sub>OPS<sup>+</sup>: 275.0654, found: 275.0652.

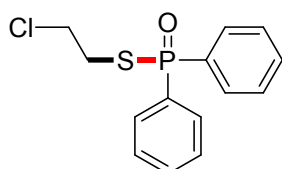

### S-(2-chloroethyl) diphenylphosphinothioate

**3o**: Colorless oil; <sup>1</sup>H NMR (500 MHz, CDCl<sub>3</sub>): δ 7.90-7.86 (m, 4H), 7.56-7.54 (m, 2H), 7.50-7.47 (m, 4H), 3.67 (t, *J* = 7.5 Hz, 2H), 3.11 (dt, *J* = 12.8, 7.5 Hz, 2H); <sup>13</sup>C NMR (125 MHz, CDCl<sub>3</sub>): δ 132.5 (d, *J* = 105.4 Hz), 132.5 (d, *J* = 2.7 Hz), 131.3 (d, *J* = 10.6 Hz), 128.6 (d, *J* = 13.2 Hz), 43.3 (d, *J* = 2.6 Hz), 30.9 (d, *J* = 2.0 Hz); <sup>31</sup>P NMR (202 MHz, CDCl<sub>3</sub>): δ 43.53; HRMS: *m/z* [M+H]<sup>+</sup> calcd for C<sub>14</sub>H<sub>15</sub>ClOPS<sup>+</sup>: 297.0264, found: 297.0265.

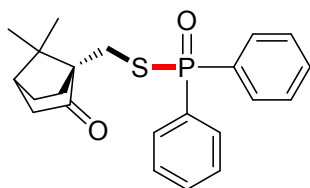

**S-(((1S)-7,7-dimethyl-2-oxobicyclo[2.2.1]heptan-1-yl)methyl)diphenylphosphinothioate**

**3p:** Colorless oil;  $^1\text{H}$  NMR (500 MHz,  $\text{CDCl}_3$ ):  $\delta$  7.96-7.92 (m, 2H), 7.88-7.84 (m, 2H), 7.54-7.45 (m, 6H), 2.99-2.95 (m, 1H), 2.85-2.80 (m, 1H), 2.35-2.31 (m, 1H), 2.04-2.02 (m, 1H), 1.94-1.82 (m, 3H), 1.57-1.52 (m, 1H), 1.35-1.31 (m, 1H), 0.98 (s, 3H), 0.85 (s, 3H);  $^{13}\text{C}$  NMR (125 MHz,  $\text{CDCl}_3$ ):  $\delta$  216.2 (d,  $J = 8.8$  Hz), 133.0 (d,  $J = 106.8$  Hz), 132.8 (d,  $J = 106.9$  Hz), 132.0, 131.3 (d,  $J = 10.4$  Hz), 131.1 (d,  $J = 10.4$  Hz), 128.4 (d,  $J = 12.5$  Hz), 128.3 (d,  $J = 12.5$  Hz), 60.0 (d,  $J = 4.1$  Hz), 47.8, 43.4, 42.7, 26.9, 26.4, 25.2 (d,  $J = 1.5$  Hz), 19.8, 19.5;  $^{31}\text{P}$  NMR (202 MHz,  $\text{CDCl}_3$ ):  $\delta$  41.51; HRMS:  $m/z$   $[\text{M}+\text{H}]^+$  calcd for  $\text{C}_{22}\text{H}_{26}\text{ClO}_2\text{PS}^+$ : 385.1386, found: 385.1384.

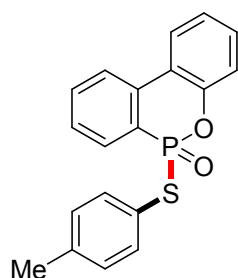

**6-(p-tolylthio)-6H-dibenzo[c,e][1,2]oxaphosphinine 6-oxide**

**4a:** Colorless oil;  $^1\text{H}$  NMR (500 MHz,  $\text{CDCl}_3$ ):  $\delta$  7.91-7.86 (m, 1H), 7.77-7.72 (m, 1H), 7.66-7.58 (m, 2H), 7.45-7.41 (m, 1H), 7.31-7.25 (m, 1H), 7.13-7.04 (m, 4H), 6.82-6.80 (m, 2H), 2.15 (s, 3H);  $^{13}\text{C}$  NMR (125 MHz,  $\text{CDCl}_3$ ):  $\delta$  150.1 (d,  $J = 9.6$  Hz), 139.4 (d,  $J = 3.2$  Hz), 136.0 (d,  $J = 7.2$  Hz), 135.5 (d,  $J = 4.0$  Hz), 133.5 (d,  $J = 1.9$  Hz), 130.3 (d,  $J = 10.1$  Hz), 130.1, 129.5 (d,  $J = 2.5$  Hz), 128.1 (d,  $J = 14.9$  Hz), 124.6, 124.4 (d,  $J = 132.9$  Hz), 124.1, 123.0 (d,  $J = 11.4$  Hz), 121.3 (d,  $J = 11.3$  Hz), 119.9 (d,  $J = 5.7$  Hz), 119.6 (d,  $J = 6.8$  Hz), 20.8;  $^{31}\text{P}$  NMR (202 MHz,  $\text{CDCl}_3$ ):  $\delta$  33.53; HRMS:  $m/z$   $[\text{M}+\text{H}]^+$  calcd for  $\text{C}_{19}\text{H}_{16}\text{O}_2\text{PS}^+$ : 339.0603, found: 339.0613.

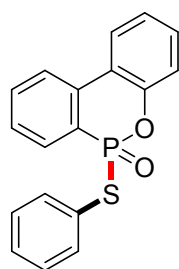

**6-((phenyl)thio)-6H-dibenzo[c,e][1,2]oxaphosphinine 6-oxide**

**4b:** Colorless oil;  $^1\text{H}$  NMR (500 MHz,  $\text{CDCl}_3$ ):  $\delta$  7.90-7.85 (m, 1H), 7.77-7.75 (m, 1H), 7.68-7.66 (m, 1H), 7.63-7.59 (m, 1H), 7.45-7.41 (m, 1H), 7.31-7.28 (m, 1H), 7.20-7.18 (m, 2H), 7.16-7.11 (m, 3H), 7.04-7.01 (m, 2H);  $^{13}\text{C}$  NMR (125 MHz,  $\text{CDCl}_3$ ):  $\delta$  150.2 (d,  $J = 9.6$  Hz), 136.0 (d,  $J = 7.3$  Hz), 135.7 (d,  $J = 4.2$  Hz), 133.6 (d,  $J = 2.5$  Hz), 130.4 (d,  $J = 10.3$  Hz), 130.2, 129.1 (d,  $J = 2.9$  Hz), 128.8 (d,  $J = 2.6$  Hz), 128.2 (d,  $J = 15.0$  Hz), 124.7, 124.5, 124.4 (d,  $J = 132.7$  Hz), 123.9 (d,  $J = 5.6$  Hz), 123.1 (d,  $J = 11.5$  Hz), 121.4 (d,  $J = 11.6$  Hz), 119.6 (d,  $J = 7.1$  Hz);  $^{31}\text{P}$  NMR (202 MHz,  $\text{CDCl}_3$ ):  $\delta$  30.16; HRMS:  $m/z$   $[\text{M}+\text{H}]^+$  calcd for  $\text{C}_{18}\text{H}_{14}\text{O}_2\text{PS}^+$ : 325.0449, found: 325.0449.



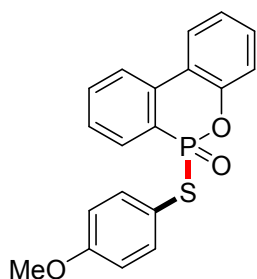

**6-((4-methoxyphenyl)thio)-6H-dibenzo[c,e][1,2]oxaphosphinine 6-oxide**

**4c:** White solid, m.p. 115.4-116.2 °C; <sup>1</sup>H NMR (500 MHz, CDCl<sub>3</sub>): δ 7.92-7.86 (m, 1H), 7.80-7.77 (m, 1H), 7.70-7.62 (m, 2H), 7.48-7.45 (m, 1H), 7.33-7.29 (m, 1H), 7.15-7.12 (m, 2H), 7.08-7.05 (m, 2H), 6.56-6.53 (m, 2H), 3.67 (s, 3H); <sup>13</sup>C NMR (125 MHz, CDCl<sub>3</sub>): δ 160.5 (d, *J* = 3.0 Hz), 150.4 (d, *J* = 9.7 Hz), 137.3 (d, *J* = 4.0 Hz), 136.2 (d, *J* = 7.2 Hz), 133.6 (d, *J* = 2.7 Hz), 130.5 (d, *J* = 10.4 Hz), 130.2, 128.3 (d, *J* = 14.9 Hz), 124.7, 124.6 (d, *J* = 131.6 Hz), 123.1 (d, *J* = 11.4 Hz), 121.5 (d, *J* = 11.4 Hz), 119.7 (d, *J* = 7.1 Hz), 114.9, 114.5 (d, *J* = 2.5 Hz), 113.9 (d, *J* = 5.8 Hz), 55.1; <sup>31</sup>P NMR (202 MHz, CDCl<sub>3</sub>): δ 33.30; HRMS: *m/z* [M+H]<sup>+</sup> calcd for C<sub>19</sub>H<sub>16</sub>O<sub>3</sub>PS<sup>+</sup>: 355.0552, found: 355.0551.

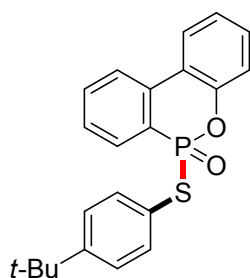

**6-((4-(tert-butyl)phenyl)thio)-6H-dibenzo[c,e][1,2]oxaphosphinine 6-oxide**

**4d<sup>3</sup>:** Colorless oil; <sup>1</sup>H NMR (500 MHz, CDCl<sub>3</sub>): δ 7.95-7.91 (m, 1H), 7.76-7.74 (m, 1H), 7.64-7.61 (m, 2H), 7.48-7.44 (m, 1H), 7.30-7.27 (m, 1H), 7.13-6.99 (m, 6H), 1.17 (s, 9H); <sup>13</sup>C NMR (125 MHz, CDCl<sub>3</sub>): δ 152.5 (d, *J* = 3.4 Hz), 150.6 (d, *J* = 9.7 Hz), 136.2 (d, *J* = 7.1 Hz), 135.6 (d, *J* = 4.0 Hz), 133.6, 130.5 (d, *J* = 10.3 Hz), 130.2, 128.3 (d, *J* = 14.9 Hz), 125.8 (d, *J* = 2.4 Hz), 124.6 (d, *J* = 132.5 Hz), 124.6, 124.3, 122.8 (d, *J* = 11.4 Hz), 121.4 (d, *J* = 11.2 Hz), 120.1 (d, *J* = 5.0 Hz), 119.7 (d, *J* = 7.1 Hz), 34.3, 30.9; <sup>31</sup>P NMR (202 MHz, CDCl<sub>3</sub>): δ 34.70; HRMS: *m/z* [M+H]<sup>+</sup> calcd for C<sub>22</sub>H<sub>22</sub>O<sub>2</sub>PS<sup>+</sup>: 381.1074, found: 381.1073.

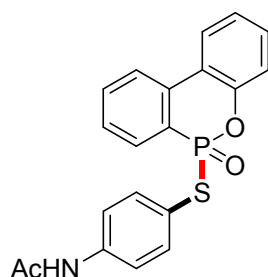

### 6-((4-acetamidophenyl)thio)-6H-dibenzo[c,e][1,2]oxaphosphinine 6-oxide

**4e:** White solid, m.p. 199.5-200.1 °C; <sup>1</sup>H NMR (500 MHz, DMSO-*d*<sub>6</sub>): δ 11.39 (s, 1H), 9.48-9.45 (m, 1H), 9.36-9.35 (m, 1H), 9.20-9.13 (m, 2H), 9.02-8.94 (m, 1H), 8.81-8.78 (m, 1H), 8.74-8.72 (m, 2H), 8.65-8.60 (m, 2H), 8.44-8.42 (m, 2H), 3.36 (s, 3H); <sup>13</sup>C NMR (125 MHz, DMSO-*d*<sub>6</sub>): δ 169.0, 150.1 (d, *J* = 9.7 Hz), 141.1 (d, *J* = 2.8 Hz), 136.5 (d, *J* = 4.0 Hz), 136.2 (d, *J* = 7.4 Hz), 134.9, 131.4, 130.7 (d, *J* = 10.4 Hz), 129.4 (d, *J* = 14.3 Hz), 126.1, 125.5, 124.6 (d, *J* = 131.8 Hz), 124.5 (d, *J* = 10.9 Hz), 121.7 (d, *J* = 11.4 Hz), 120.2 (d, *J* = 6.7 Hz), 119.8, 116.5 (d, *J* = 5.3 Hz), 24.5; <sup>31</sup>P NMR (202 MHz, DMSO-*d*<sub>6</sub>): δ 33.65; HRMS: *m/z* [M+H]<sup>+</sup> calcd for C<sub>20</sub>H<sub>17</sub>O<sub>3</sub>PS<sup>+</sup>: 382.0661, found: 382.0657.

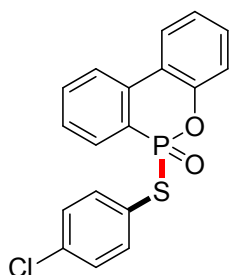

### 6-((4-chlorophenyl)thio)-6H-dibenzo[c,e][1,2]oxaphosphinine 6-oxide

**4f:** White solid, m.p. 106.0-106.5 °C; <sup>1</sup>H NMR (500 MHz, CDCl<sub>3</sub>): δ 7.93-7.89 (m, 1H), 7.84-7.81 (m, 1H), 7.73-7.66 (m, 2H), 7.51-7.48 (m, 1H), 7.36-7.33 (m, 1H), 7.23-7.11 (m, 4H), 7.03-7.01 (m, 2H); <sup>13</sup>C NMR (125 MHz, CDCl<sub>3</sub>): δ 150.2 (d, *J* = 9.7 Hz), 137.1 (d, *J* = 4.3 Hz), 136.3 (d, *J* = 7.5 Hz), 136.0 (d, *J* = 3.5 Hz), 133.9, 130.6, 130.5, 129.1 (d, *J* = 2.6 Hz), 128.5 (d, *J* = 15.0 Hz), 124.9, 124.6, 124.4 (d, *J* = 132.4 Hz), 123.3 (d, *J* = 11.4 Hz), 122.6 (d, *J* = 7.6 Hz), 121.6 (d, *J* = 11.4 Hz), 119.8 (d, *J* = 7.2 Hz); <sup>31</sup>P NMR (202 MHz, CDCl<sub>3</sub>): δ 33.58; HRMS: *m/z* [M+H]<sup>+</sup> calcd for C<sub>18</sub>H<sub>13</sub>ClO<sub>2</sub>PS<sup>+</sup>: 359.0057, found: 359.0058.

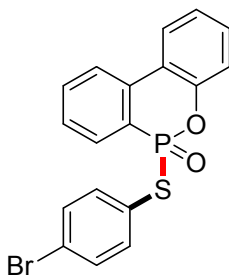

### 6-((4-bromophenyl)thio)-6H-dibenzo[c,e][1,2]oxaphosphinine 6-oxide

**4g:** White solid, m.p. 122.4-124.3 °C; <sup>1</sup>H NMR (500 MHz, CDCl<sub>3</sub>): δ 7.94-7.89 (m, 1H), 7.84-7.81 (m, 1H), 7.73-7.67 (m, 2H), 7.52-7.48 (m, 1H), 7.36-7.33 (m, 1H), 7.22-7.13 (m, 4H), 7.07-7.04 (m, 2H); <sup>13</sup>C NMR (125 MHz, CDCl<sub>3</sub>): 150.3 (d, *J* = 9.5 Hz), 137.3 (d, *J* = 4.4 Hz), 136.4 (d, *J* = 7.5 Hz), 133.9 (d, *J* = 2.7 Hz), 132.1 (d, *J* = 2.7 Hz), 130.7, 130.6 (d, *J* = 6.0 Hz), 128.6 (d, *J* = 15.2 Hz), 125.0, 124.7, 124.5 (d, *J* = 133.9 Hz),

124.3 (d,  $J = 3.7$  Hz), 123.4 (d,  $J = 6.7$  Hz), 123.3 (d,  $J = 11.5$  Hz), 121.7 (d,  $J = 11.6$  Hz), 119.9 (d,  $J = 7.0$  Hz);  $^{31}\text{P}$  NMR (202 MHz,  $\text{CDCl}_3$ ):  $\delta$  32.10; HRMS:  $m/z$   $[\text{M}+\text{H}]^+$  calcd for  $\text{C}_{18}\text{H}_{13}\text{BrO}_2\text{PS}^+$ : 402.9552, found: 402.9548.

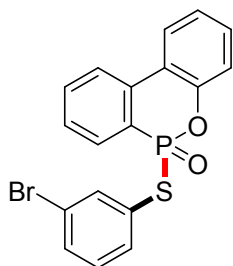

#### 6-((3-bromophenyl)thio)-6H-dibenzo[c,e][1,2]oxaphosphinine 6-oxide

**4h:** White solid, m.p. 78.2-79.8°C;  $^1\text{H}$  NMR (500 MHz,  $\text{CDCl}_3$ ):  $\delta$  7.97-7.92 (m, 1H), 7.86-7.83 (m, 1H), 7.74-7.68 (m, 2H), 7.54-7.51 (m, 1H), 7.37-7.34 (m, 1H), 7.29-7.26 (m, 2H), 7.20-7.15 (m, 3H), 6.93-6.90 (m, 1H);  $^{13}\text{C}$  NMR (125 MHz,  $\text{DMSO}-d_6$ )  $\delta$  150.2 (d,  $J = 9.8$  Hz), 137.9 (d,  $J = 4.2$  Hz), 136.3 (d,  $J = 7.2$  Hz), 135.2, 134.8 (d,  $J = 4.2$  Hz), 133.0 (d,  $J = 2.5$  Hz), 131.6, 131.4 (d,  $J = 2.2$  Hz), 130.8 (d,  $J = 10.4$  Hz), 129.6 (d,  $J = 15.0$  Hz), 126.3 (d,  $J = 6.0$  Hz), 126.0, 125.6, 124.5 (d,  $J = 11.3$  Hz), 123.9 (d,  $J = 134.0$  Hz), 122.2 (d,  $J = 2.9$  Hz), 121.4 (d,  $J = 11.2$  Hz), 120.0 (d,  $J = 6.8$  Hz);  $^{31}\text{P}$  NMR (202 MHz,  $\text{CDCl}_3$ ):  $\delta$  32.88; HRMS:  $m/z$   $[\text{M}+\text{H}]^+$  calcd for  $\text{C}_{18}\text{H}_{13}\text{BrO}_2\text{PS}^+$ : 402.9552, found: 402.9552.

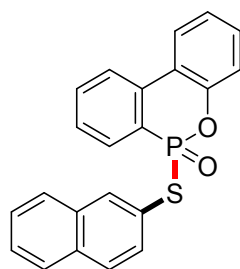

#### 6-(naphthalen-2-ylthio)-6H-dibenzo[c,e][1,2]oxaphosphinine 6-oxide

**4i:** White solid, m.p. 168.7-169.6°C;  $^1\text{H}$  NMR (500 MHz,  $\text{CDCl}_3$ ):  $\delta$  7.93-7.89 (m, 1H), 7.65-7.62 (m, 3H), 7.59-7.55 (m, 1H), 7.48-7.45 (m, 2H), 7.43-7.35 (m, 4H), 7.22-7.18 (m, 2H), 7.11-7.09 (m, 1H), 6.94-6.91 (m, 1H);  $^{13}\text{C}$  NMR (125 MHz,  $\text{CDCl}_3$ ):  $\delta$  150.3 (d,  $J = 9.7$  Hz), 136.3 (d,  $J = 5.7$  Hz), 136.2 (d,  $J = 7.2$  Hz), 133.6 (d,  $J = 2.4$  Hz), 133.0 (d,  $J = 2.8$  Hz), 132.8 (d,  $J = 2.1$  Hz), 131.7 (d,  $J = 3.0$  Hz), 130.5 (d,  $J = 10.3$  Hz), 130.2, 128.4 (d,  $J = 1.9$  Hz), 128.3 (d,  $J = 15.0$  Hz), 127.5, 127.3, 127.0, 126.3, 124.5 (d,  $J = 133.6$  Hz), 124.5, 124.3, 123.1 (d,  $J = 11.4$  Hz), 121.3 (d,  $J = 11.4$  Hz), 121.0 (d,  $J = 7.3$  Hz), 119.6 (d,  $J = 7.1$  Hz);  $^{31}\text{P}$  NMR (202 MHz,  $\text{CDCl}_3$ ):  $\delta$  32.96; HRMS:  $m/z$   $[\text{M}+\text{H}]^+$  calcd for  $\text{C}_{22}\text{H}_{16}\text{O}_2\text{PS}^+$ : 375.0603, found: 375.0604.

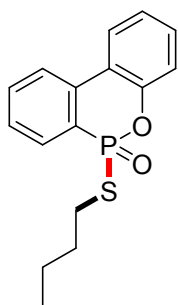

#### 6-(1-butylthio)-6H-dibenzo[c,e][1,2]oxaphosphinine 6-oxide

**4j:** Colorless oil;  $^1\text{H}$  NMR (500 MHz,  $\text{CDCl}_3$ ):  $\delta$  8.02-7.98 (m, 1H), 7.95-7.90 (m, 2H), 7.71-7.68 (m, 1H), 7.54-7.50 (m, 1H), 7.40-7.37 (m, 1H), 7.29-7.22 (m, 2H), 2.95-2.80 (m, 2H), 1.66-1.60 (m, 2H), 1.37-1.32 (m, 2H), 0.85 (t,  $J = 7.4$  Hz, 3H);  $^{13}\text{C}$  NMR (125 MHz,  $\text{CDCl}_3$ ):  $\delta$  149.5 (d,  $J = 9.7$  Hz), 136.0 (d,  $J = 7.3$  Hz), 133.6, 130.6, 130.3 (d,  $J = 10.7$  Hz), 128.5 (d,  $J = 14.9$  Hz), 126.0 (d,  $J = 135.2$  Hz), 125.1, 124.8, 123.7 (d,  $J = 11.2$  Hz), 122.3 (d,  $J = 12.2$  Hz), 120.3 (d,  $J = 6.7$  Hz), 32.8 (d,  $J = 5.0$  Hz), 29.7 (d,  $J = 3.6$  Hz), 21.5, 13.3;  $^{31}\text{P}$  NMR (202 MHz,  $\text{CDCl}_3$ ):  $\delta$  36.95; HRMS:  $m/z$   $[\text{M}+\text{H}]^+$  calcd for  $\text{C}_{16}\text{H}_{18}\text{O}_2\text{PS}^+$ : 305.0758, found: 305.0758.

#### 4. Mechanistic studies

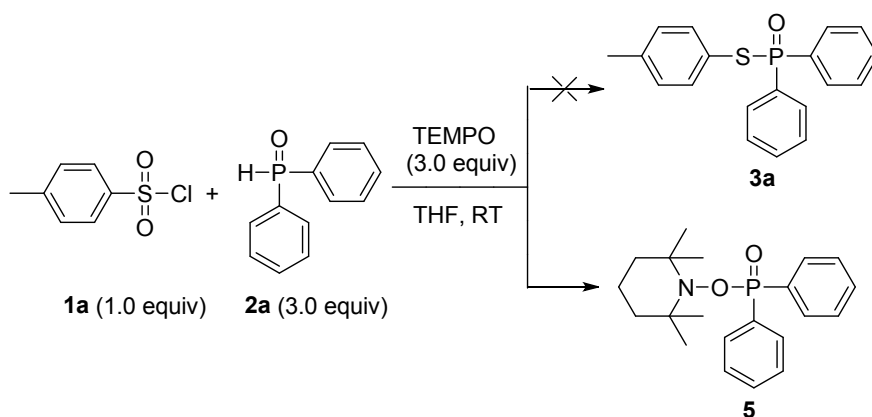

Compound **1a** (0.5 mmol), **2a** (1.5 mmol) and TEMPO (1.5 mmol) were added to a glass tube, and then 1.5 mL of THF was added. The reaction mixture was stirred at room temperature for 1 h. Compound **3a** was not found in  $^{31}\text{P}$  NMR spectra. High-resolution mass spectra analysis of this reaction mixture showed that TEMPO-trapped product **5** was formed<sup>5</sup>. HRMS:  $m/z$   $[\text{M}+\text{H}]^+$  calcd for  $\text{C}_{21}\text{H}_{29}\text{NOP}^+$ : 358.1930, found: 358.1941.

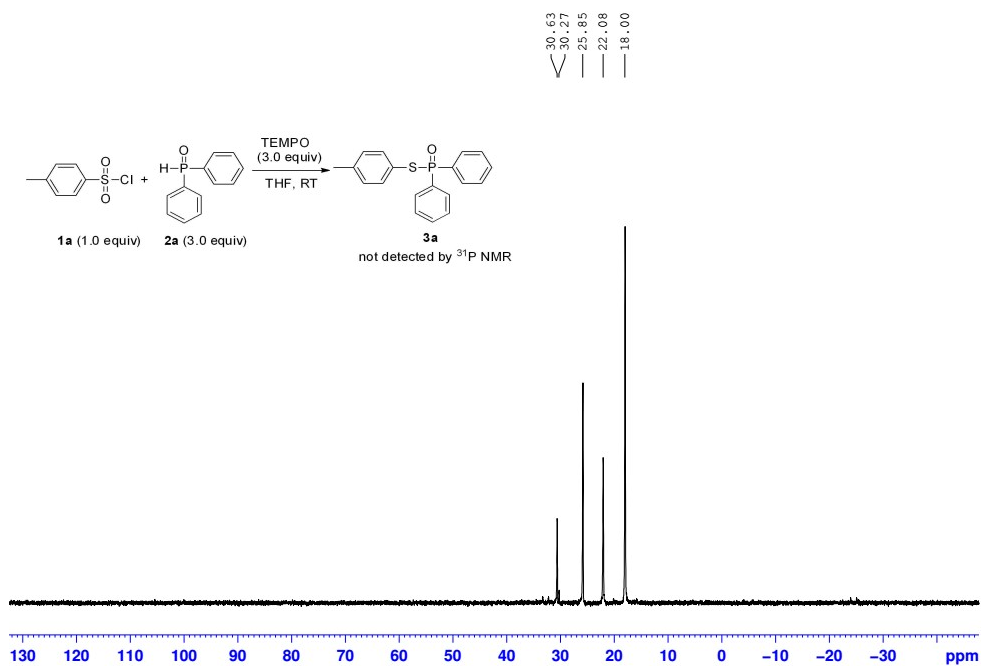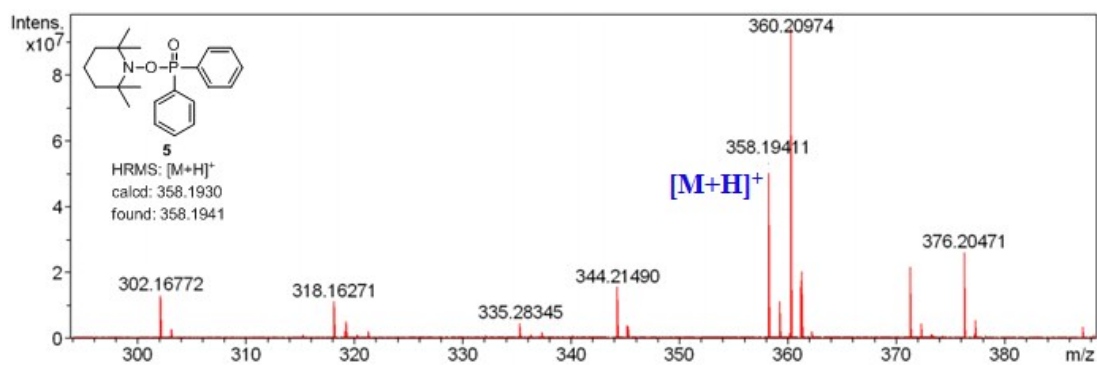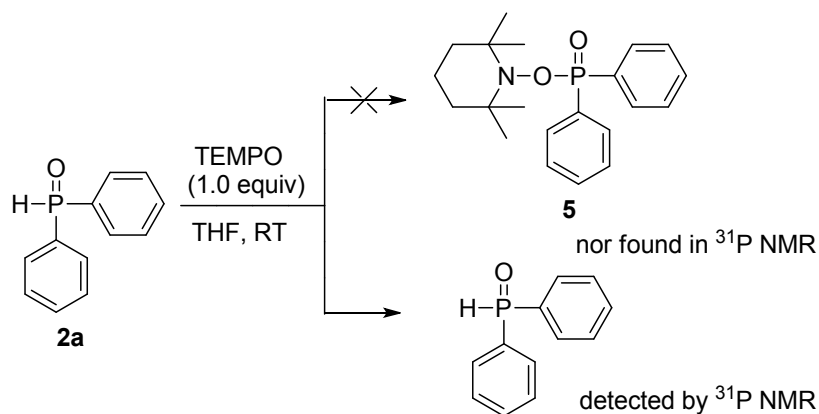

Compound **2a** (0.25 mmol) and TEMPO (0.25 mmol) were added to a glass tube, and then 1.0 mL of THF was added. The reaction mixture was stirred at room temperature for 1 h. TEMPO-trapped product **5** was not found in  $^{31}\text{P}$  NMR spectra. The starting diphenylphosphine oxide (**2a**) in THF showed signal in the  $^{31}\text{P}$  NMR spectrum at  $\delta = 18.10$  ppm.

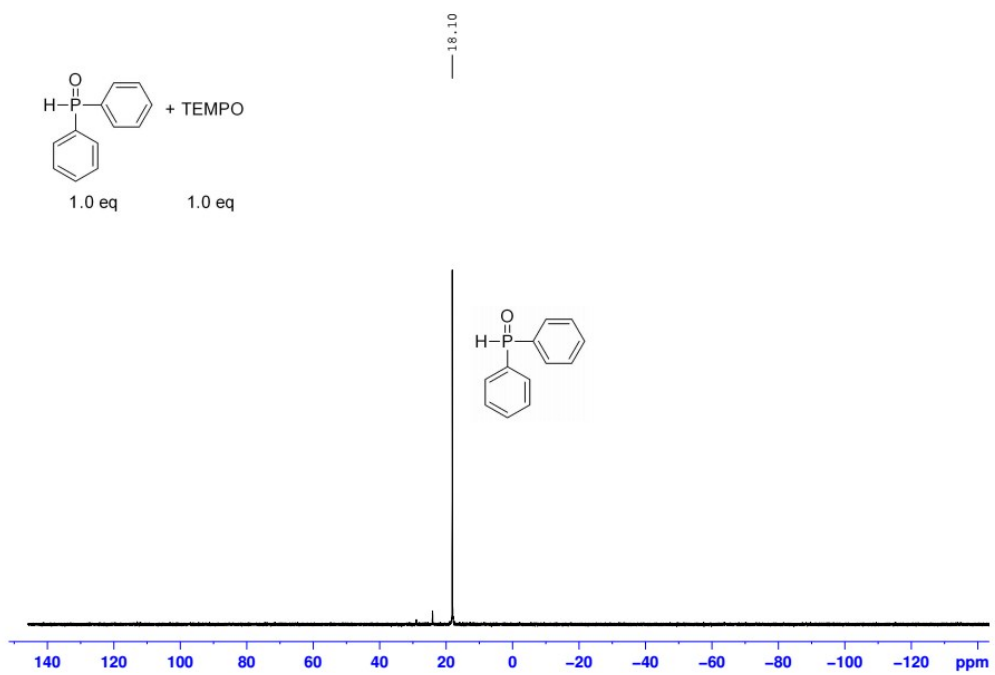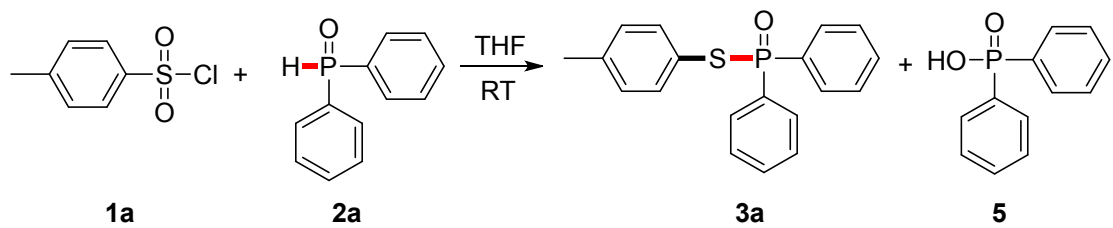

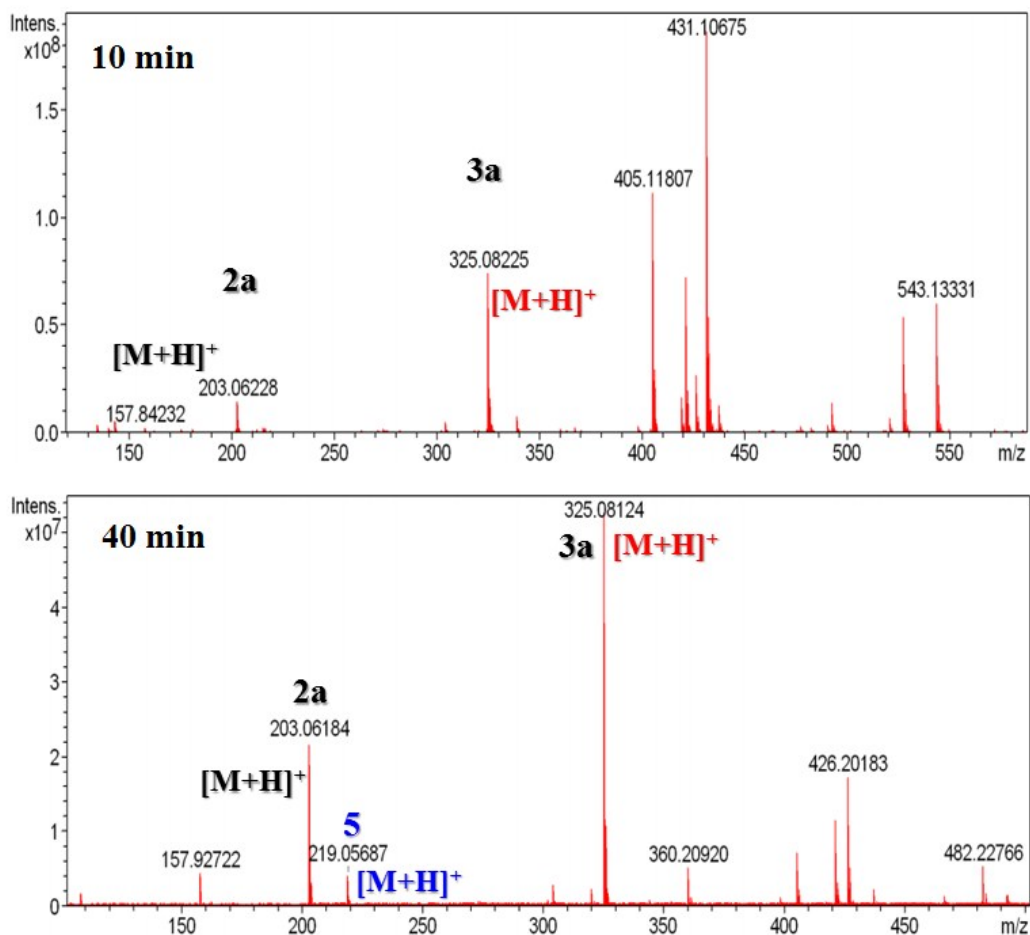

Compound **1a** (0.5 mmol), **2a** (1.5 mmol) were added to a glass tube, and then 1.5 mL of THF was added. The reaction mixture was stirred at room temperature and monitored by HRMS. Compound **2a** and **3a** were found in HRMS spectra after 10 minutes. HRMS: **2a**: m/z  $[M+H]^+$  calcd for C<sub>12</sub>H<sub>12</sub>OP<sup>+</sup>: 203.0620, found: 203.0623; **3a**: m/z  $[M+H]^+$  calcd for C<sub>19</sub>H<sub>18</sub>OPS<sup>+</sup>: 325.0811, found: 325.0823. As illustrated in figure above, the byproduct **5**, starting compound **2a** and corresponding product **3a** were all examined under the current reaction conditions after 40 minutes. HRMS: **2a**: m/z  $[M+H]^+$  calcd for C<sub>12</sub>H<sub>12</sub>OP<sup>+</sup>: 203.0620, found: 203.0618; **3a**: m/z  $[M+H]^+$  calcd for C<sub>19</sub>H<sub>18</sub>OPS<sup>+</sup>: 325.0811, found: 325.0812; **5**: m/z  $[M+H]^+$  calcd for C<sub>12</sub>H<sub>12</sub>O<sub>2</sub>P<sup>+</sup>: 219.0569, found: 219.0569.

## 5. References

- 1 S. Li, T. Q. Chen, Y. Saga and L. B. Han, *RSC Adv.*, 2015, **5**, 71544.
- 2 L. L. Zhang, P. B. Zhang, X. Q. Li, J. Xu, G. Tang and Y. F. Zhao, *J. Org. Chem.*, 2016, **81**, 5588.
- 3 Y. Y. Zhu, T. Q. Chen, S. Li, S. Shimada and L. B. Han, *J. Am. Chem. Soc.*, 2016, **138**, 5825.

- 4 J. C. Wang, X. Huang, Z. Q. Ni, S. C. Wang, J. Wu and Y. J. Pan, *Green Chem.*, 2015, **17**, 314.
- 5 J. G. Sun, H. Yang, P. Li and B. Zhang, *Org. Lett.*, 2016, **18**, 5114.

## 6. NMR Spectra

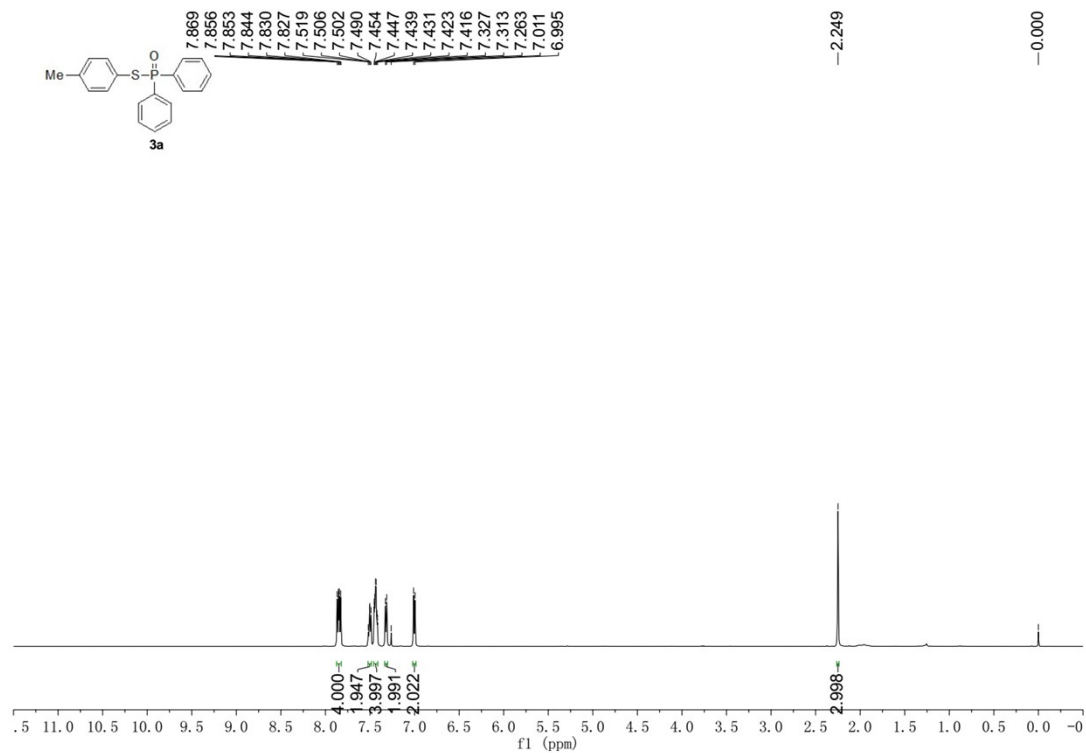

$^1\text{H}$  NMR spectrum of compound **3a**



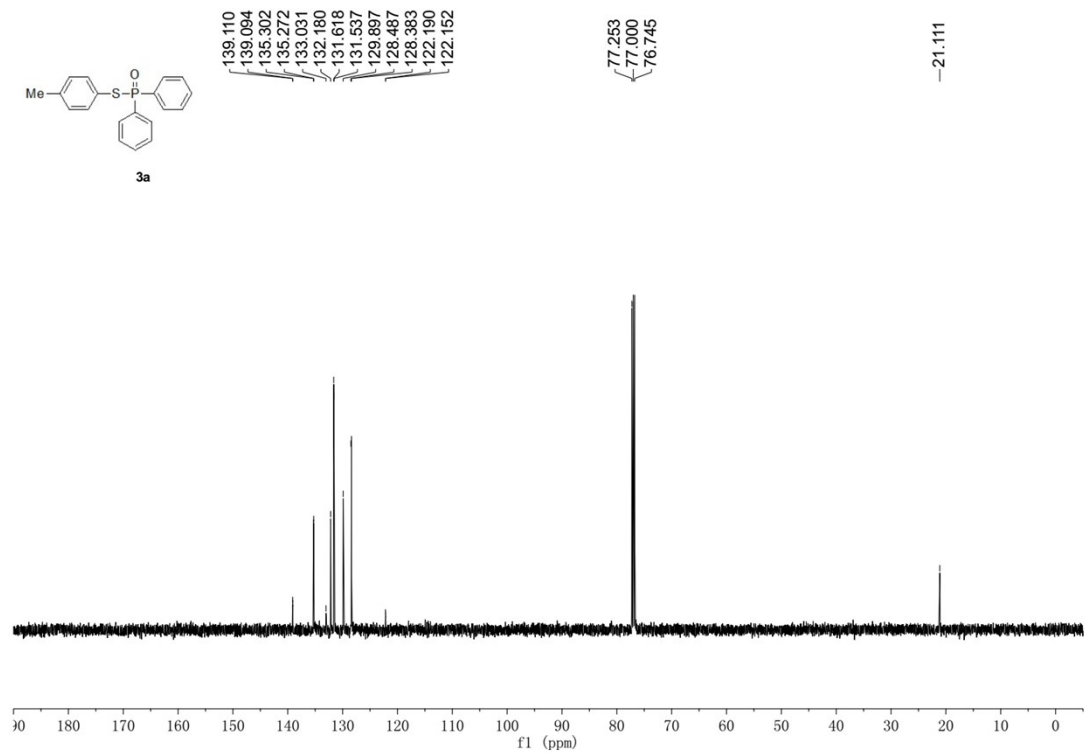

$^{13}\text{C}$  NMR spectrum of compound **3a**

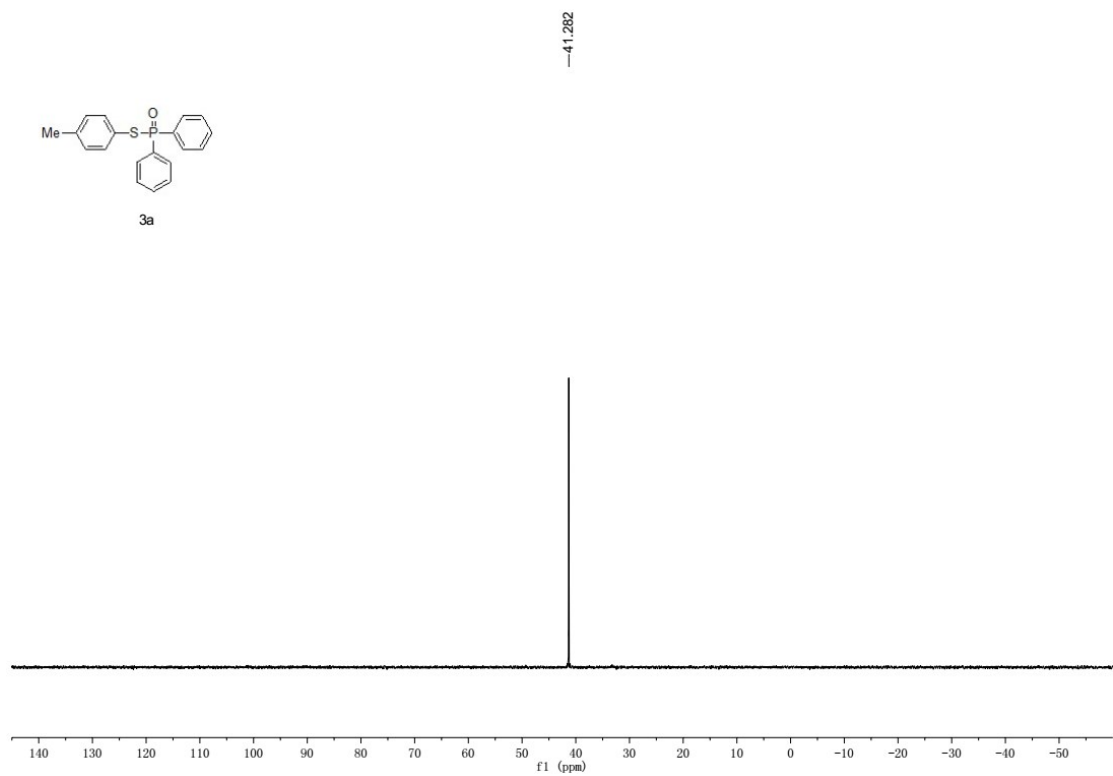

$^{31}\text{P}$  NMR spectrum of compound **3a**

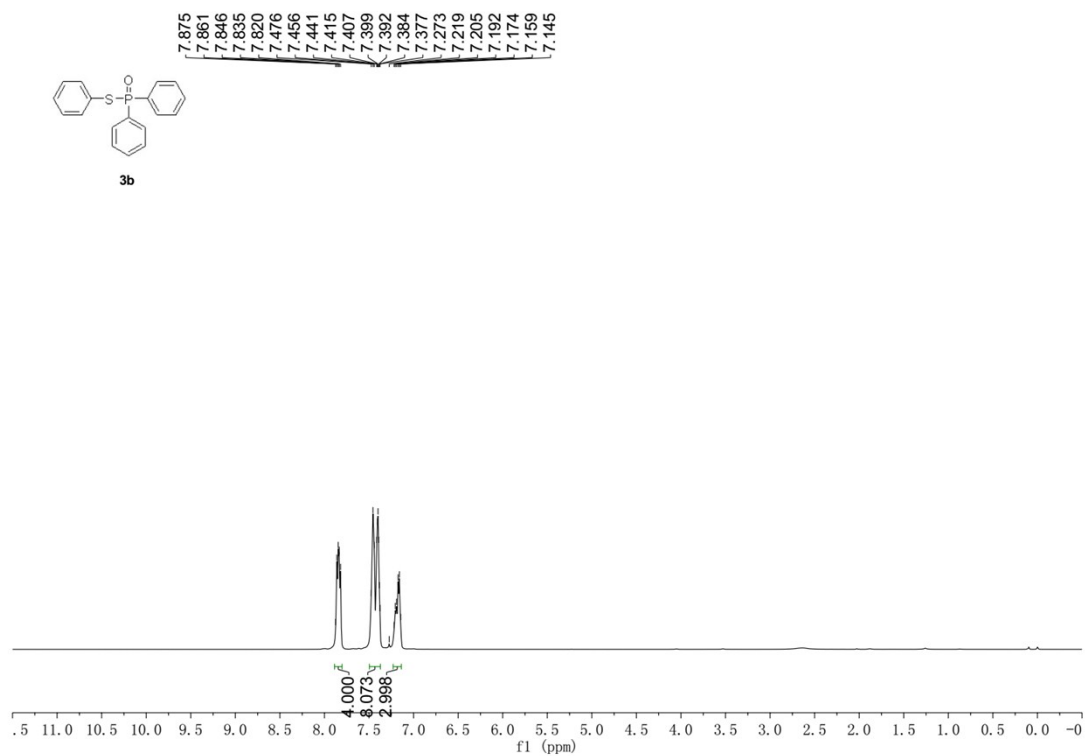

<sup>1</sup>H NMR spectrum of compound **3b**

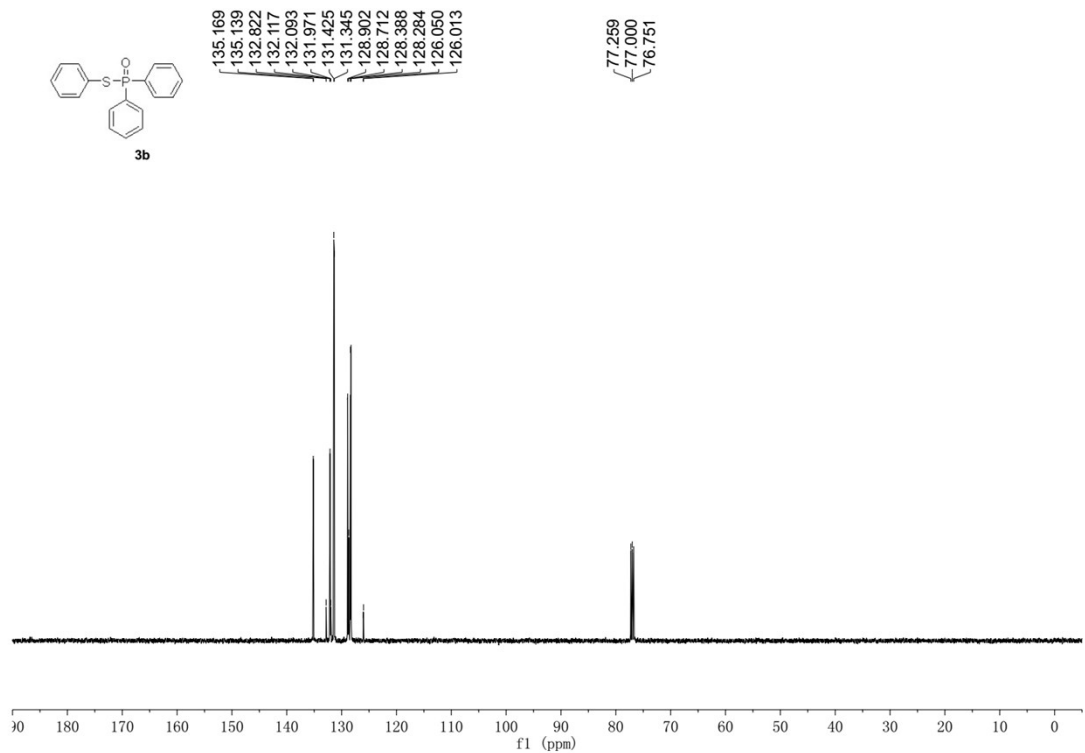

<sup>13</sup>C NMR spectrum of compound **3b**

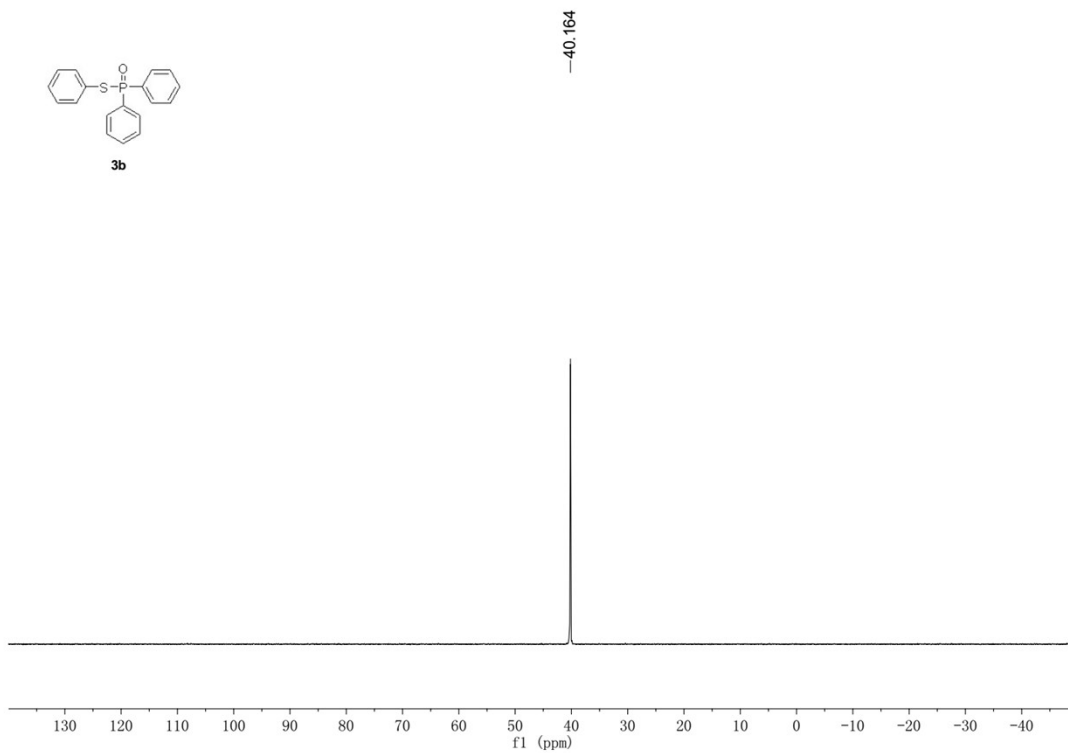

<sup>31</sup>P NMR spectrum of compound **3b**

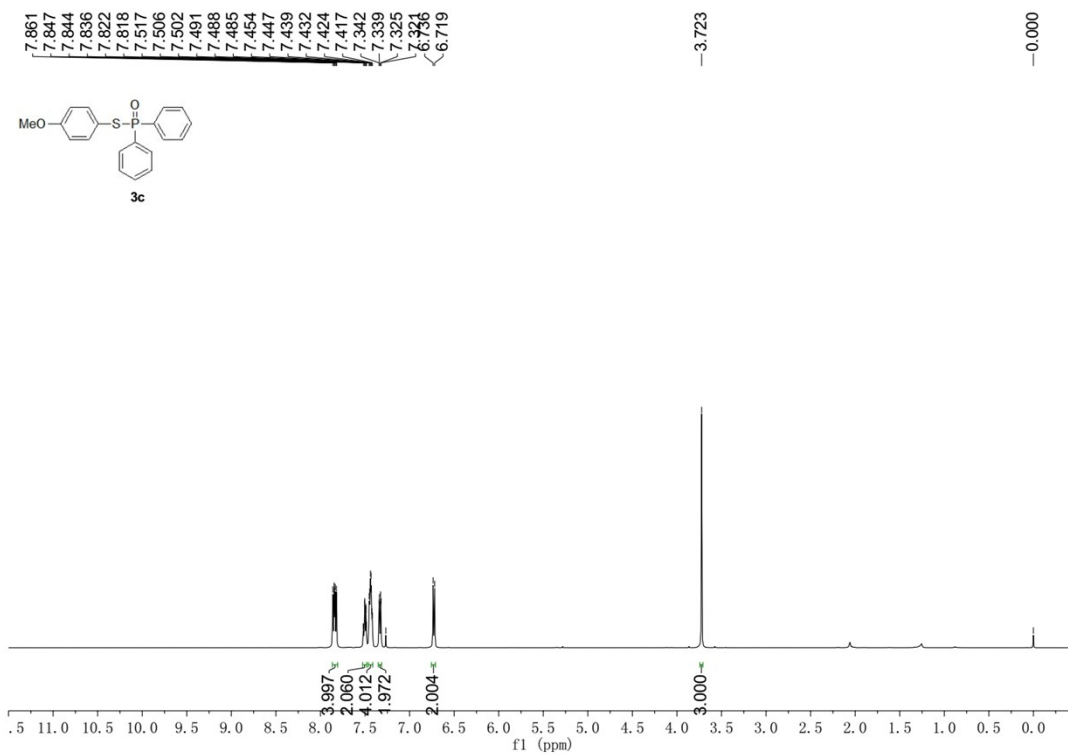

<sup>1</sup>H NMR spectrum of compound **3c**

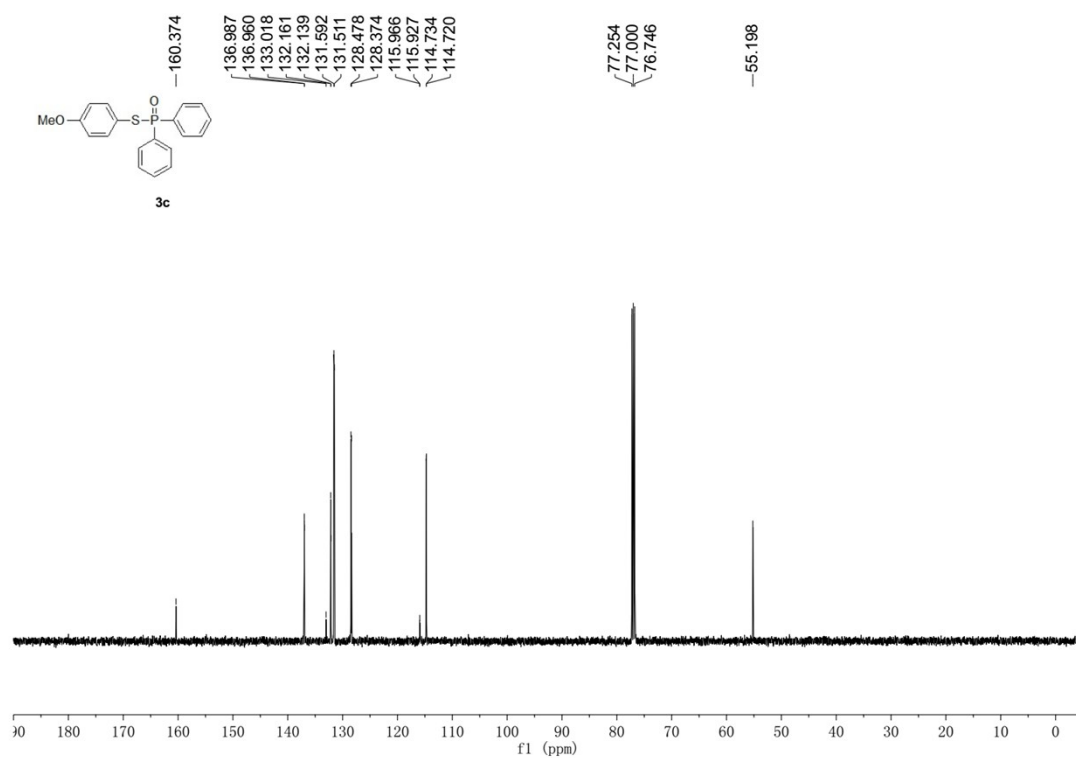

<sup>13</sup>C NMR spectrum of compound **3c**

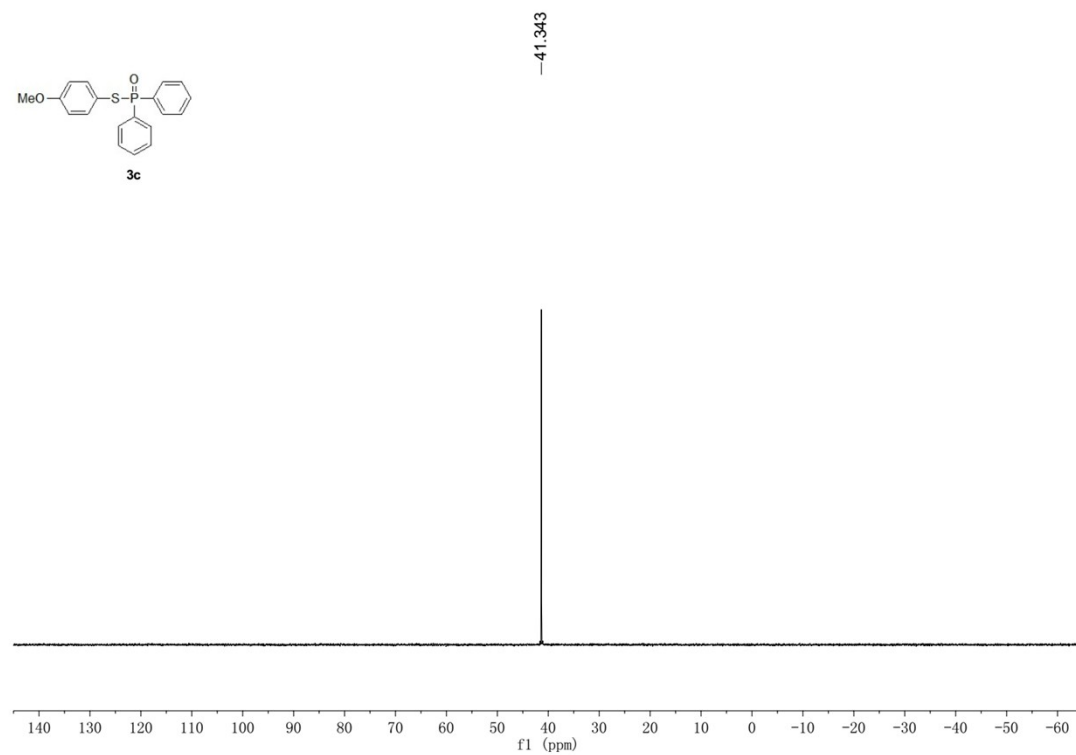

<sup>31</sup>P NMR spectrum of compound **3c**



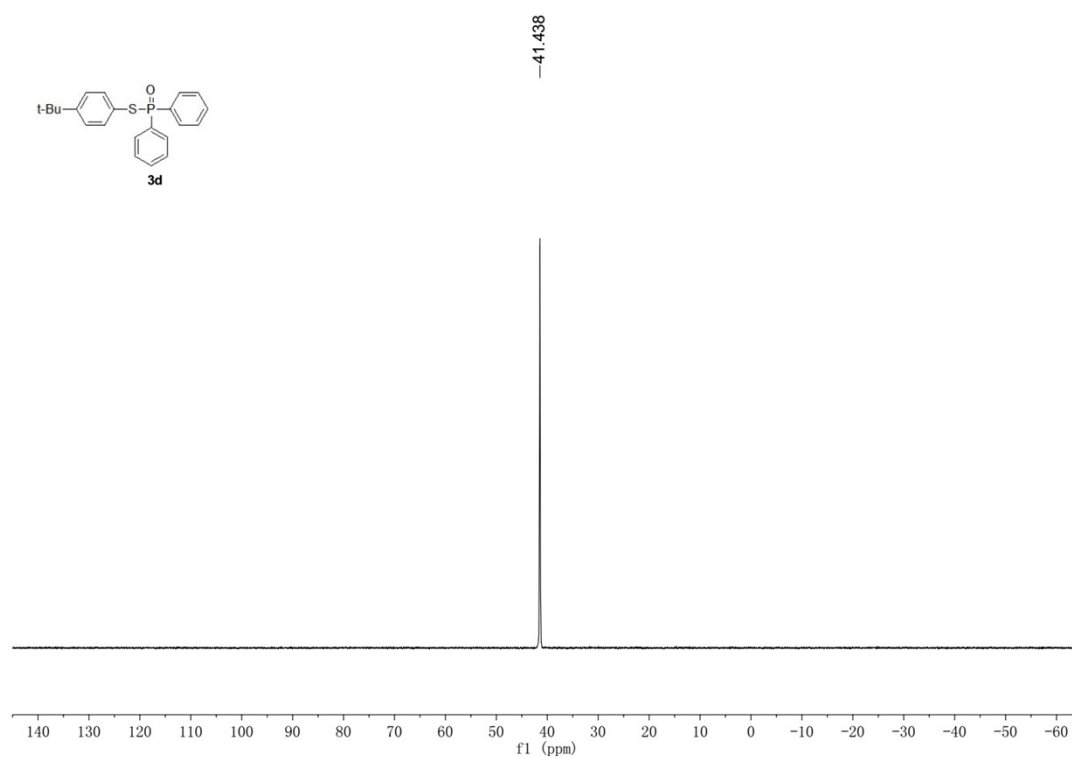

<sup>31</sup>P NMR spectrum of compound **3d**

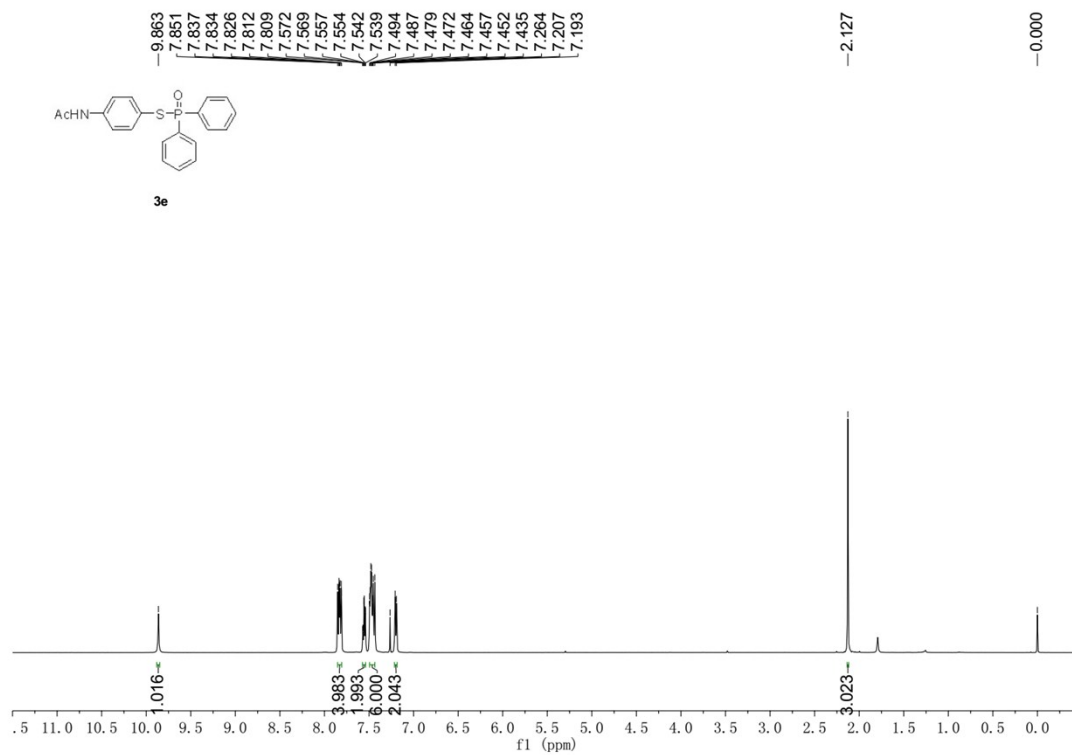

<sup>1</sup>H NMR spectrum of compound **3e**

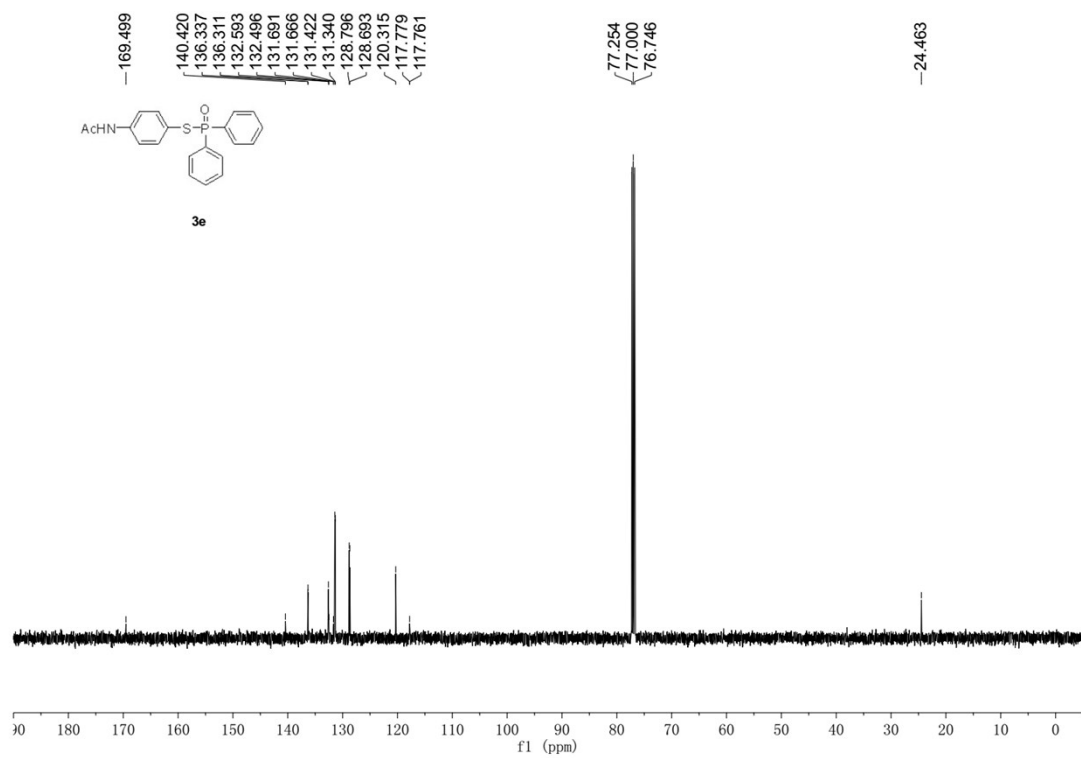

<sup>13</sup>C NMR spectrum of compound **3e**

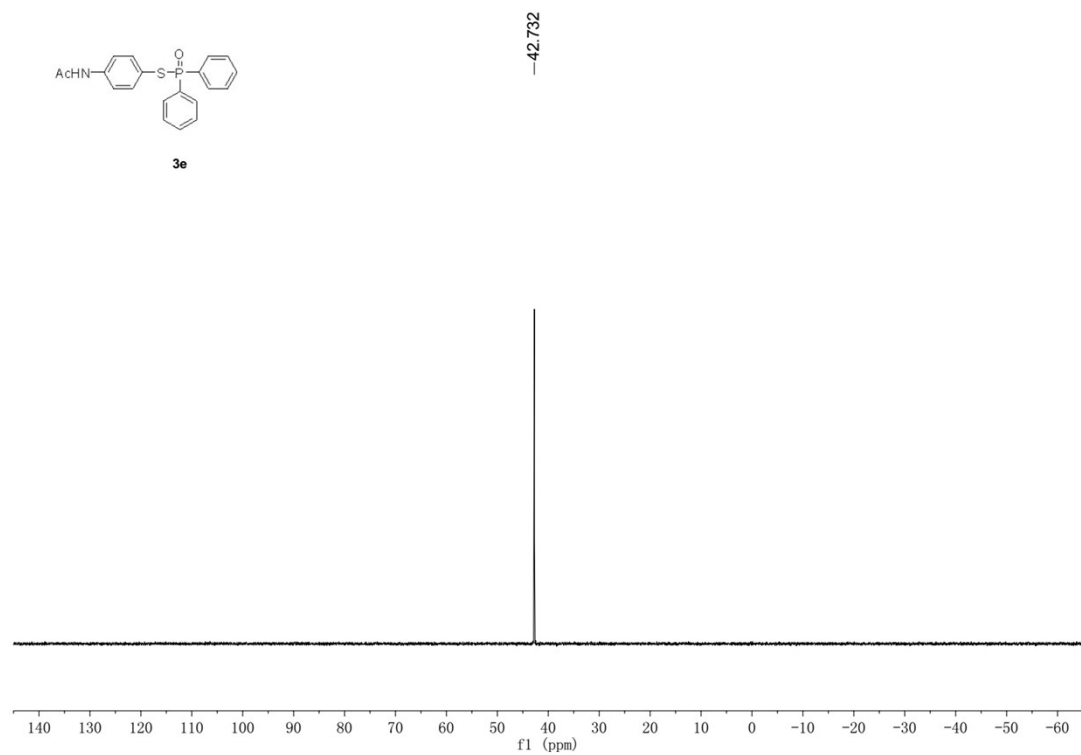

<sup>31</sup>P NMR spectrum of compound **3e**

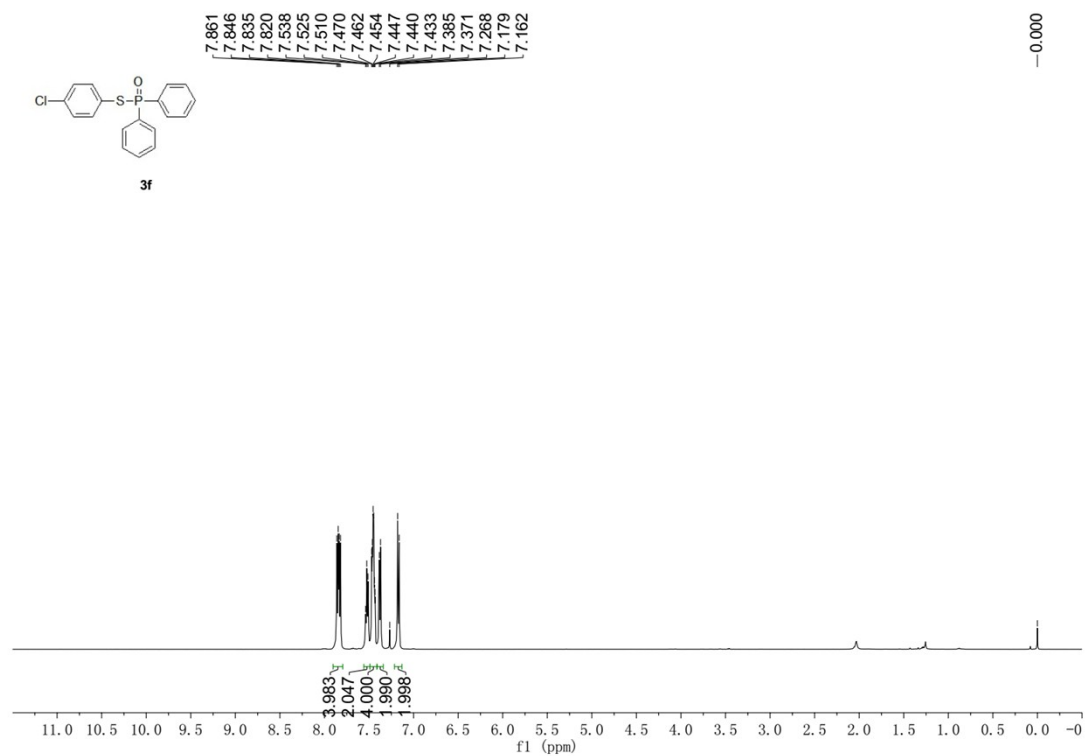

<sup>1</sup>H NMR spectrum of compound **3f**

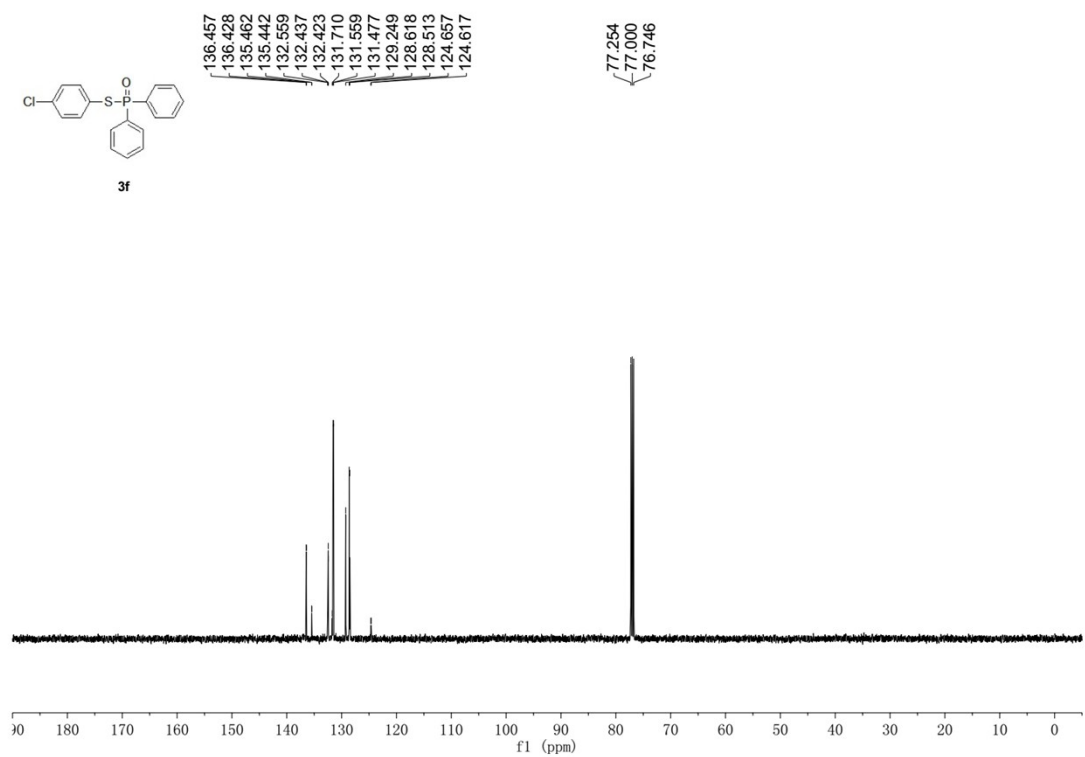

<sup>13</sup>C NMR spectrum of compound **3f**



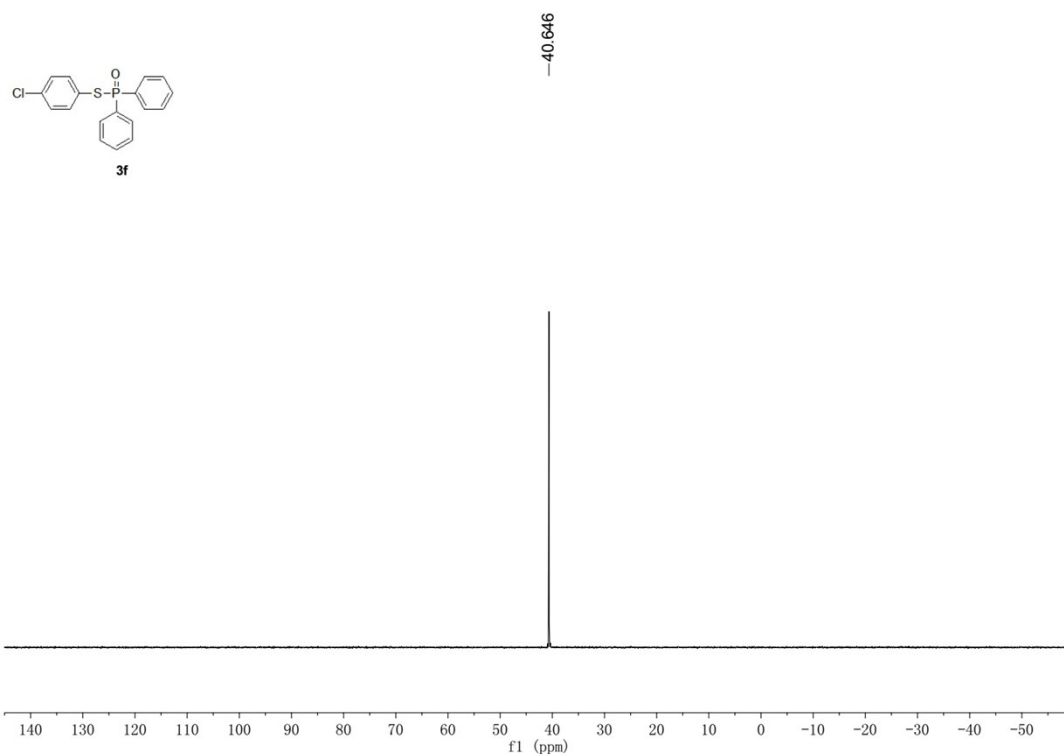

$^{31}\text{P}$  NMR spectrum of compound **3f**

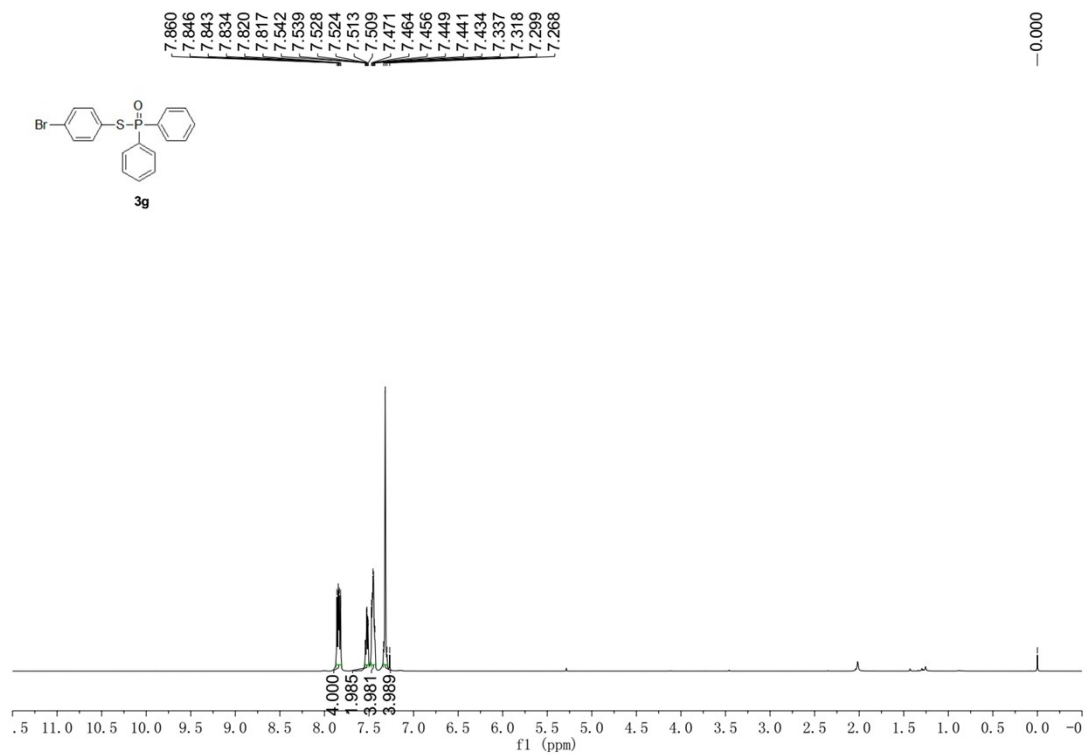

$^1\text{H}$  NMR spectrum of compound **3g**

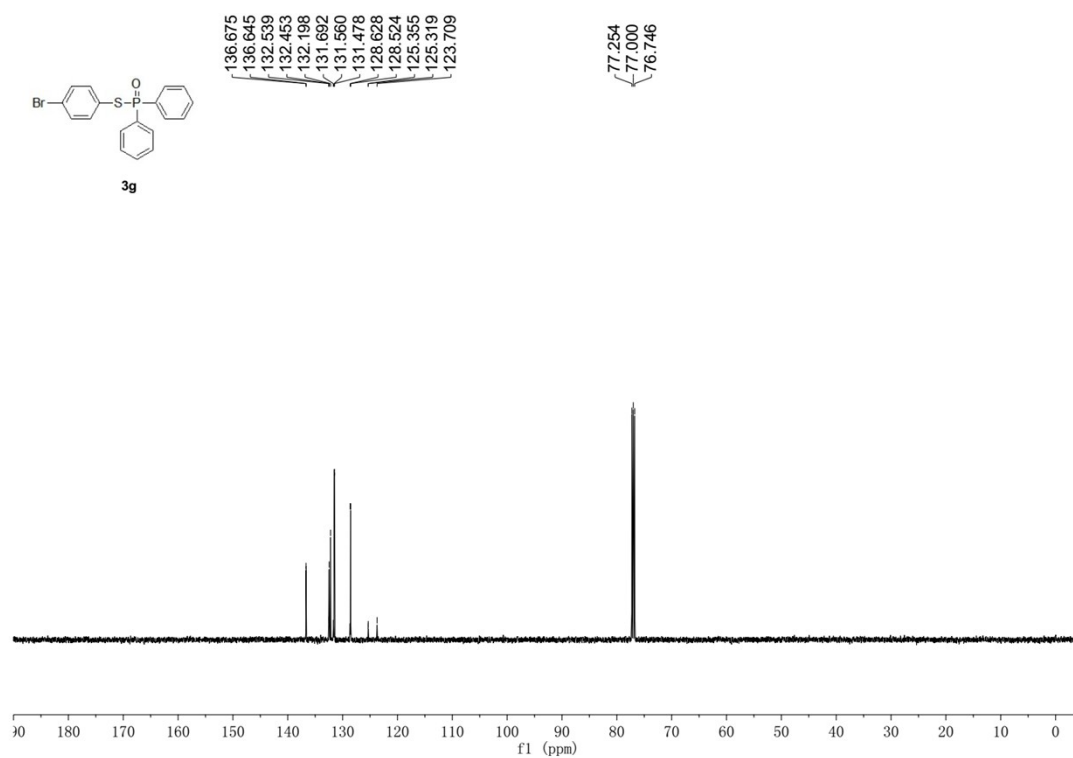

$^{13}\text{C}$  NMR spectrum of compound **3g**

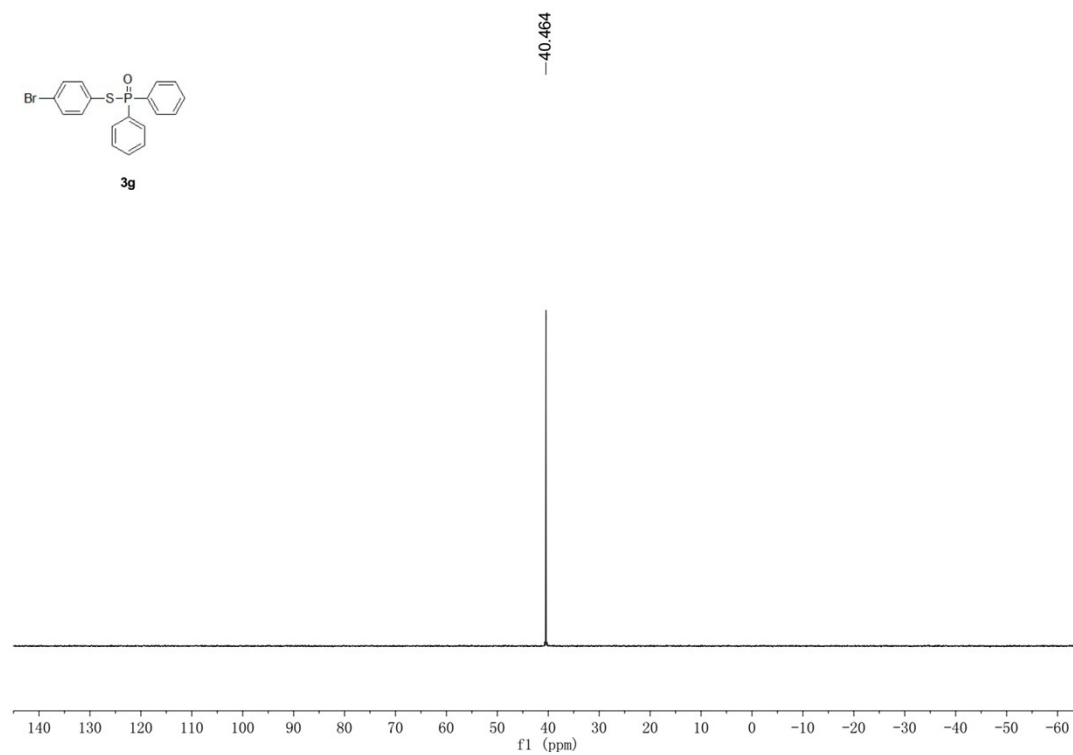

$^{31}\text{P}$  NMR spectrum of compound **3g**

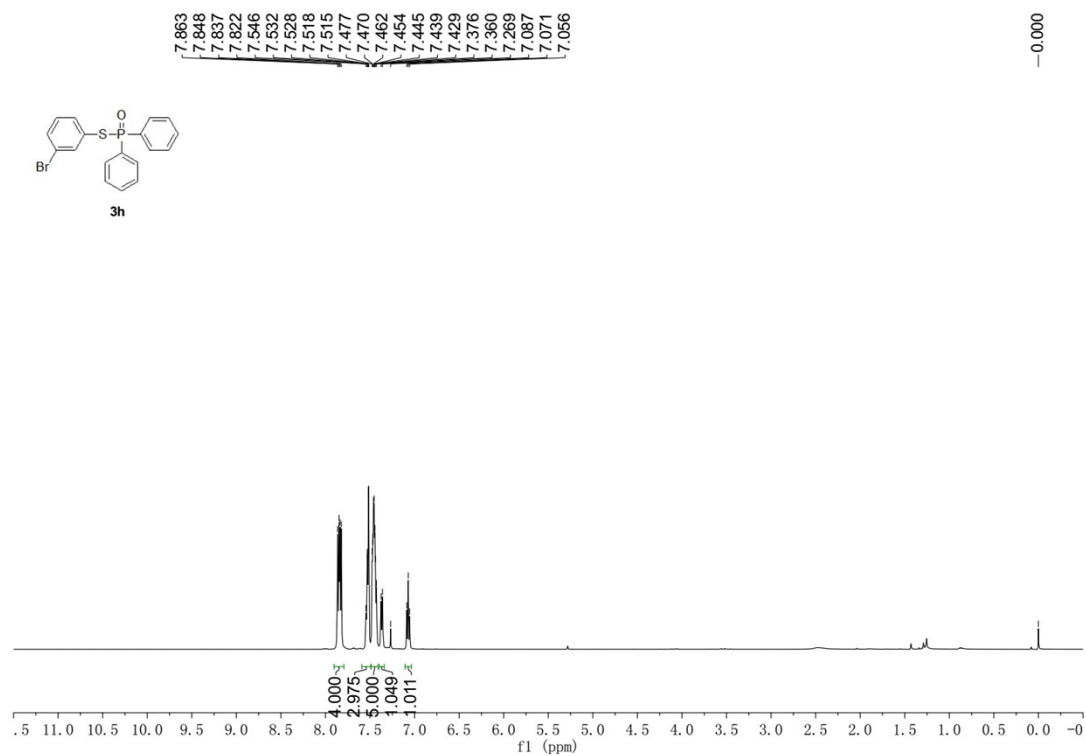

$^1\text{H}$  NMR spectrum of compound **3h**

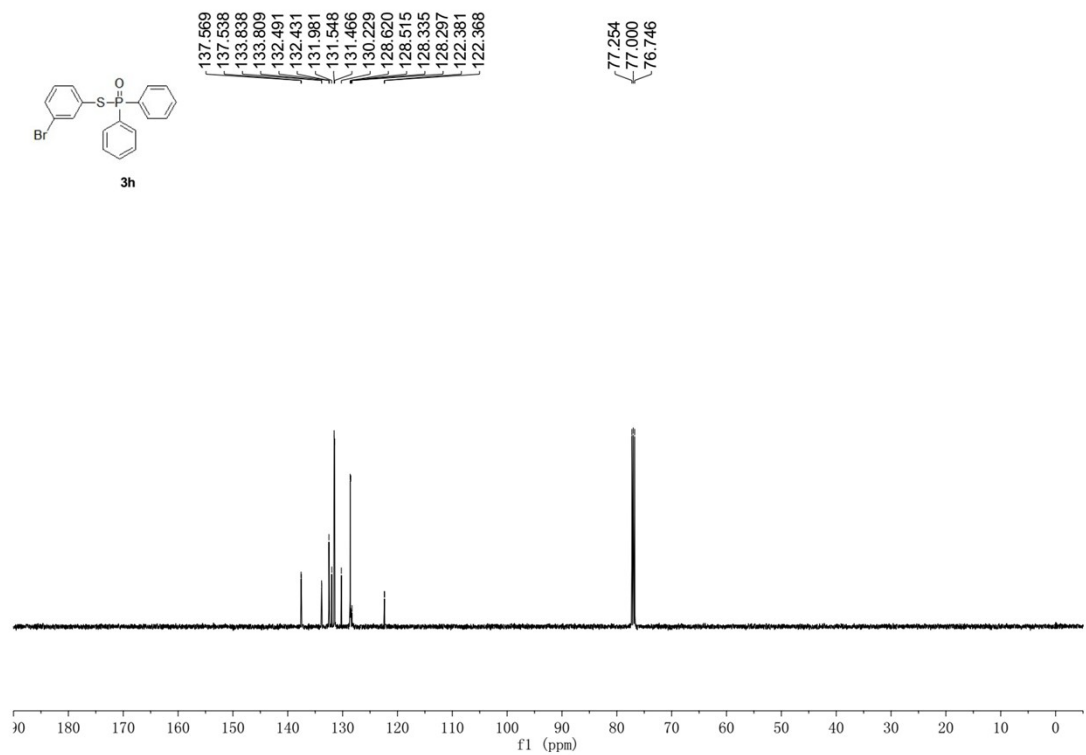

$^{13}\text{C}$  NMR spectrum of compound **3h**

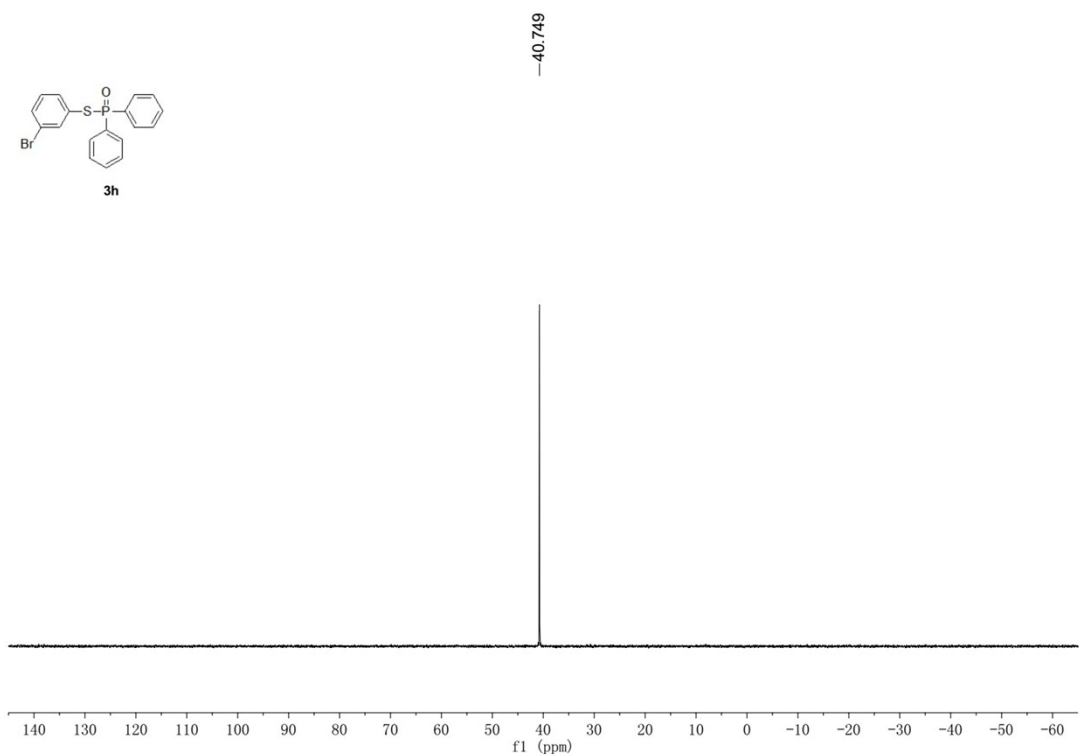

<sup>31</sup>P NMR spectrum of compound **3h**

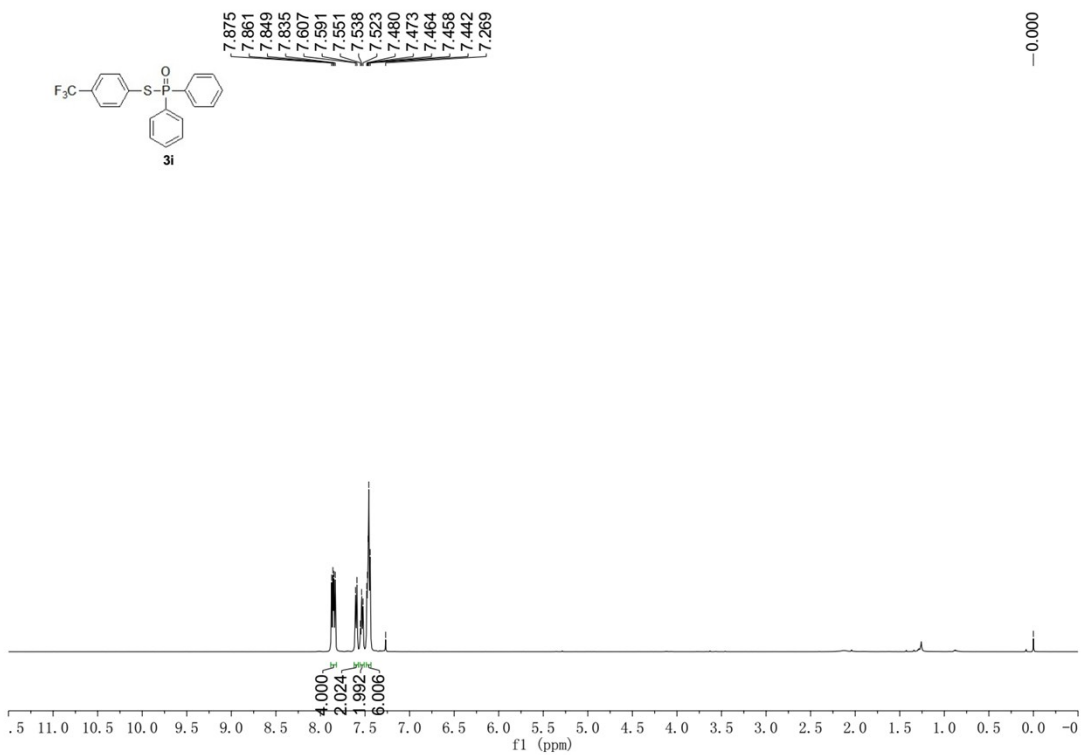

<sup>1</sup>H NMR spectrum of compound **3i**

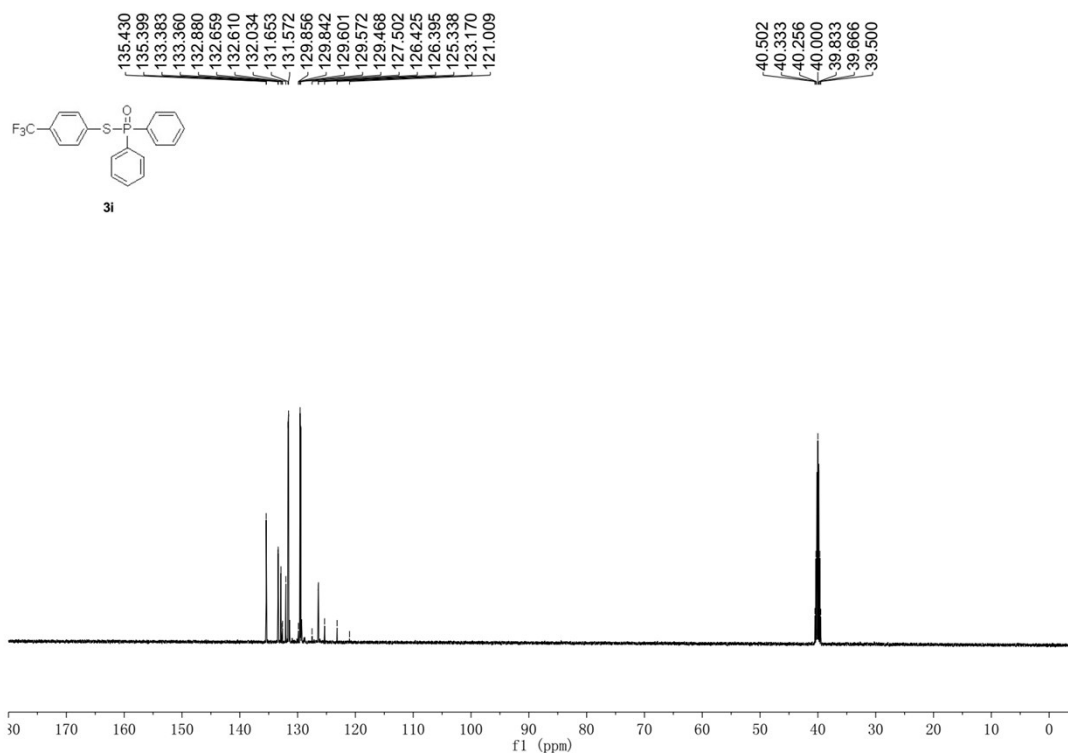

$^{13}\text{C}$  NMR spectrum of compound **3i**

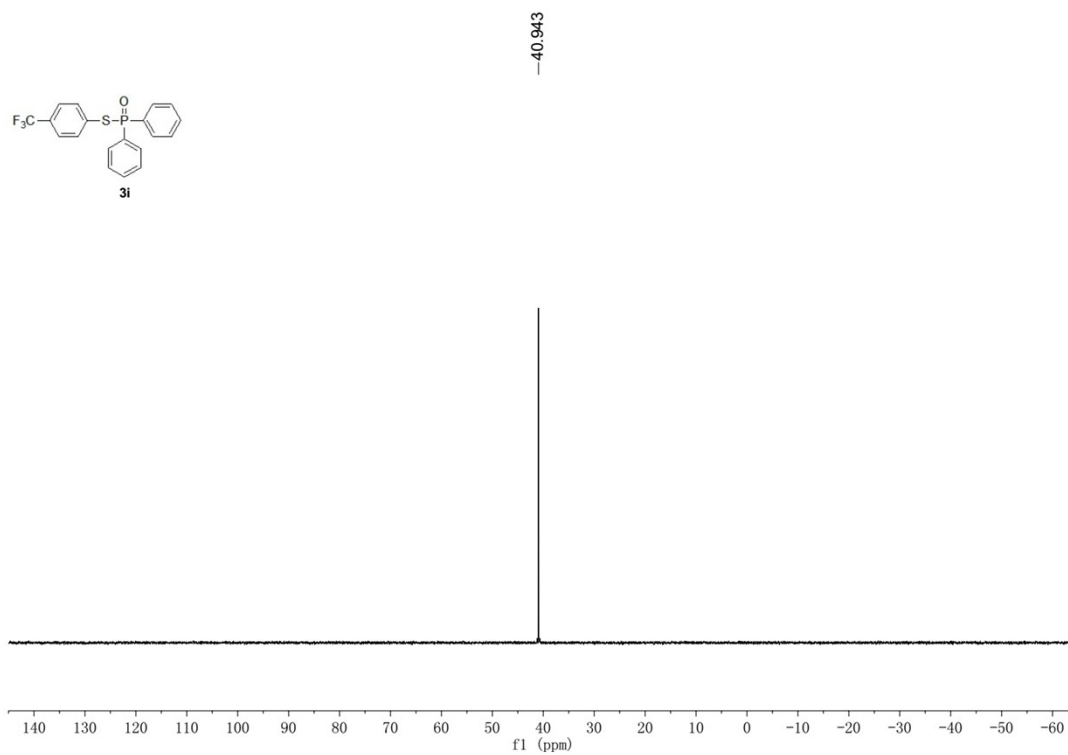

$^{31}\text{P}$  NMR spectrum of compound **3i**

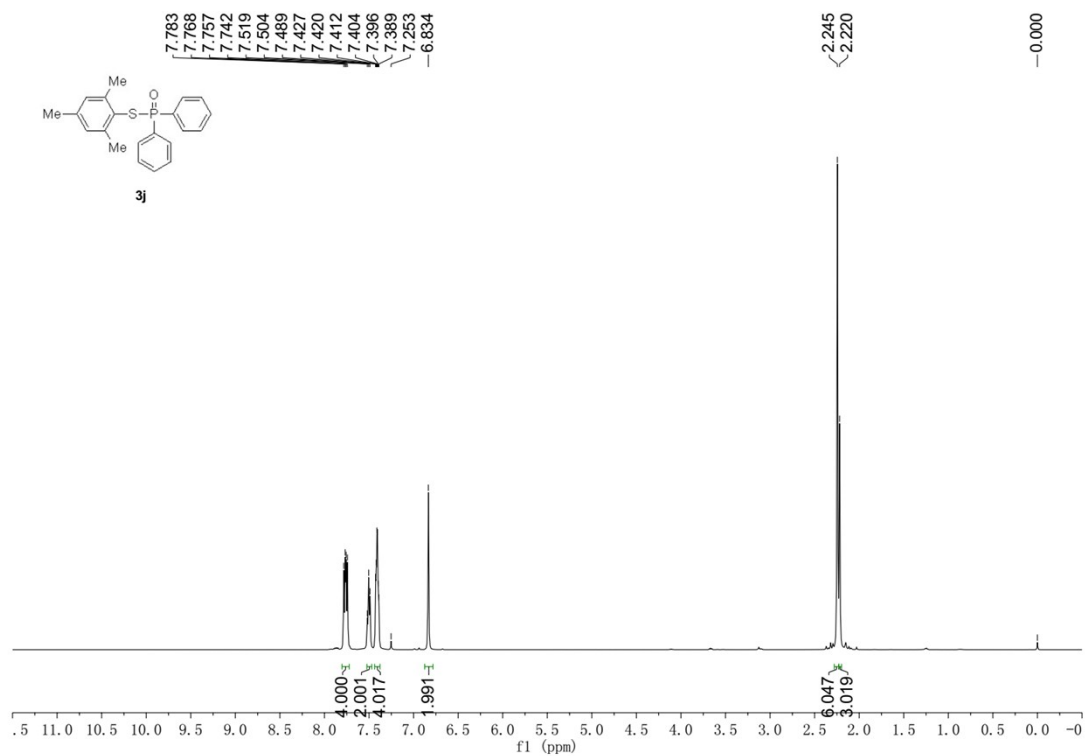

<sup>1</sup>H NMR spectrum of compound **3j**

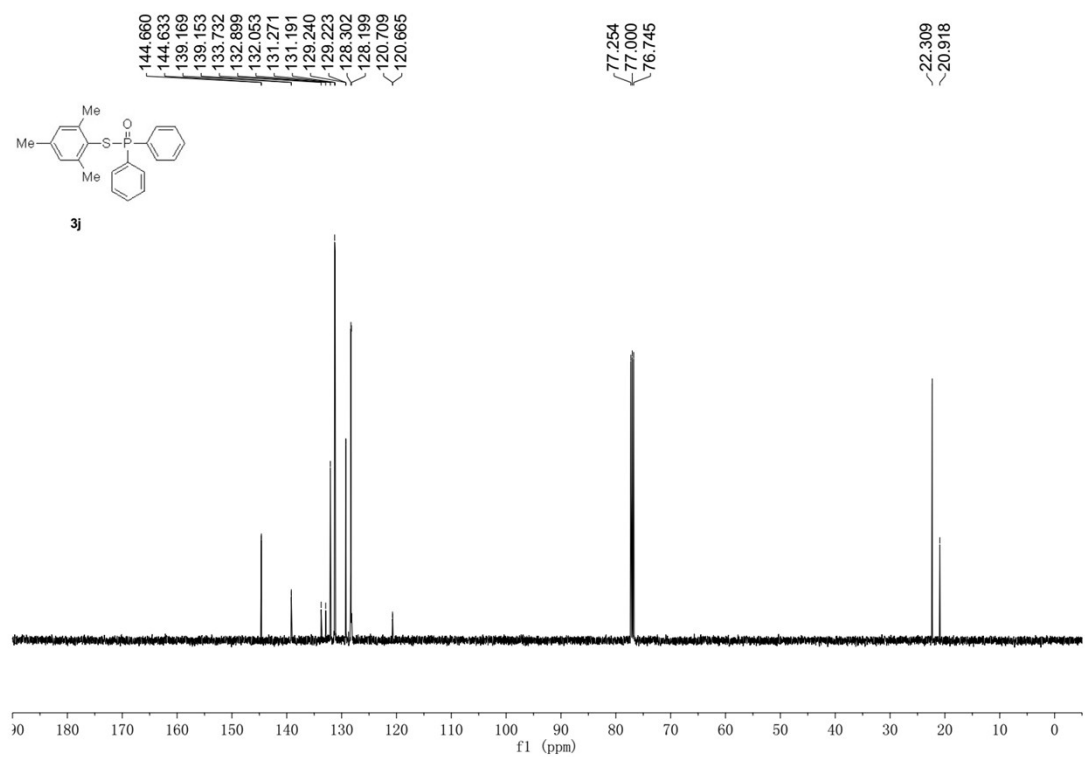

<sup>13</sup>C NMR spectrum of compound **3j**

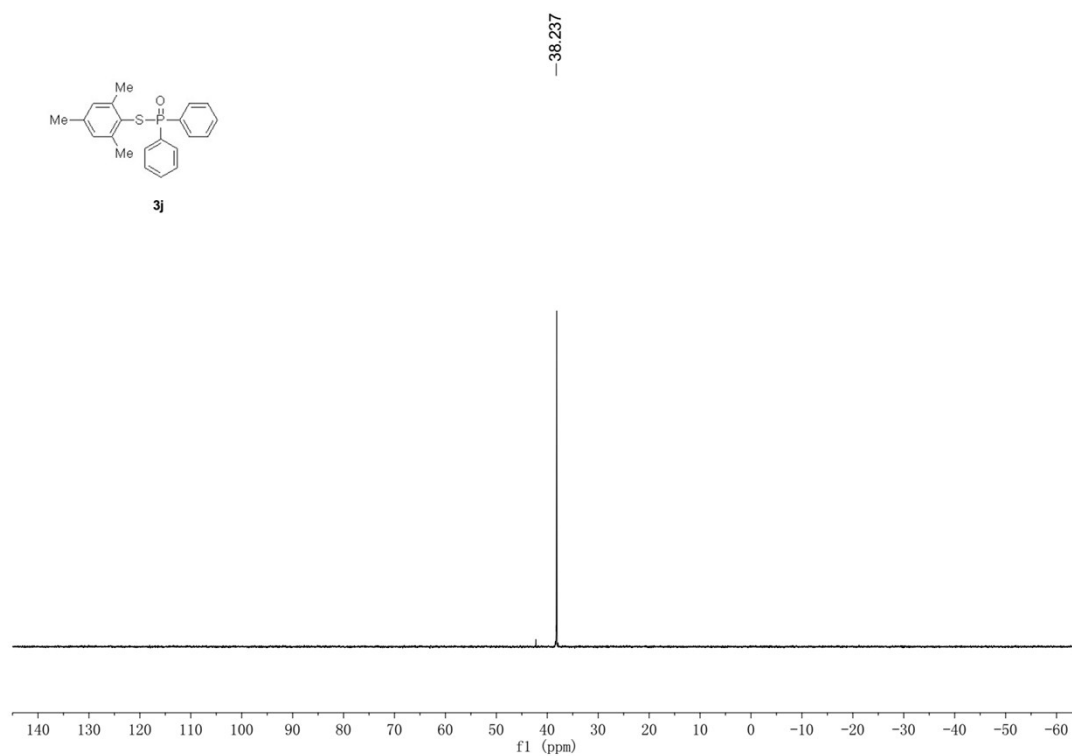

<sup>31</sup>P NMR spectrum of compound **3j**

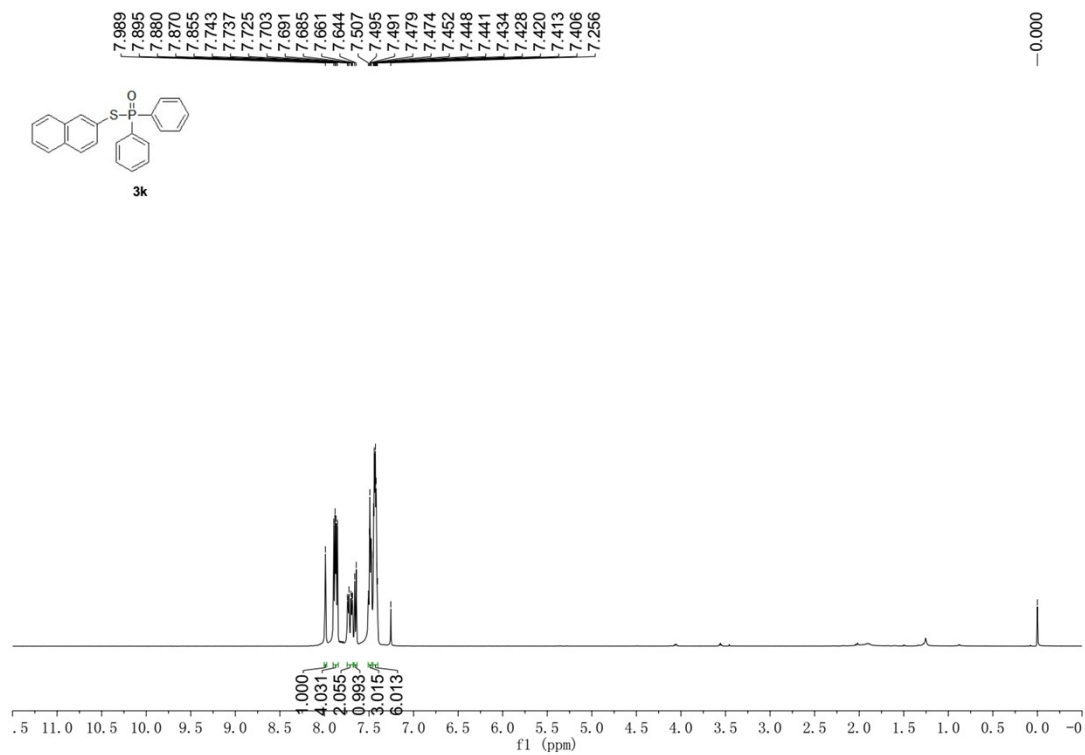

<sup>1</sup>H NMR spectrum of compound **3k**

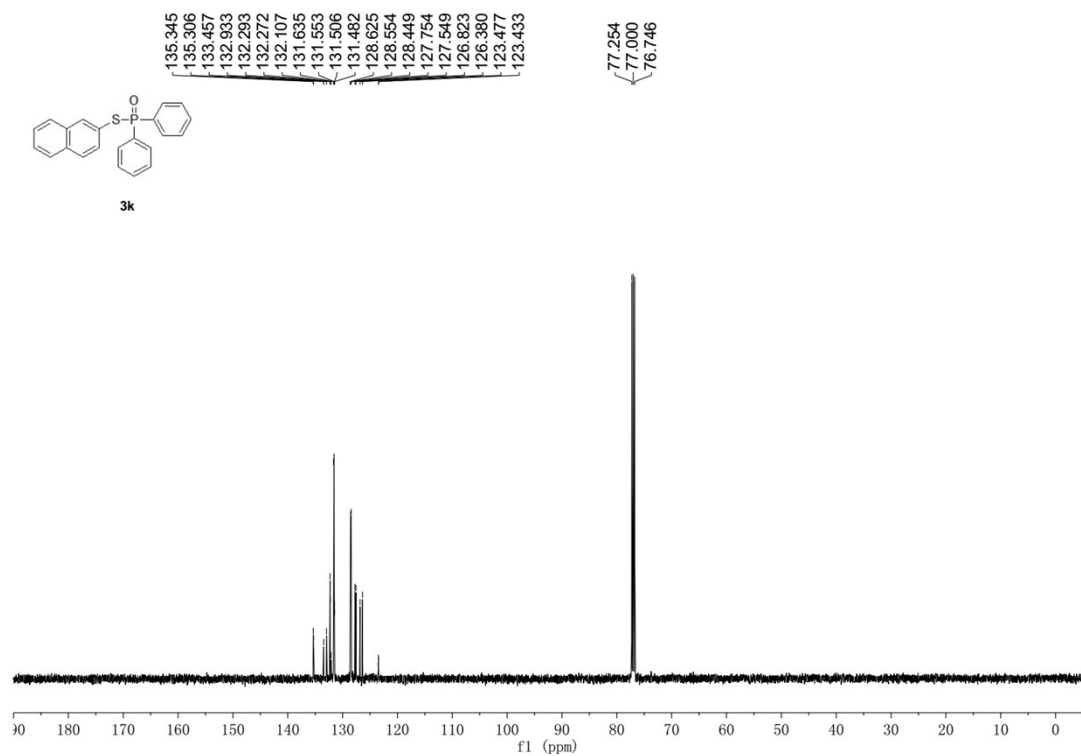

<sup>13</sup>C NMR spectrum of compound **3k**

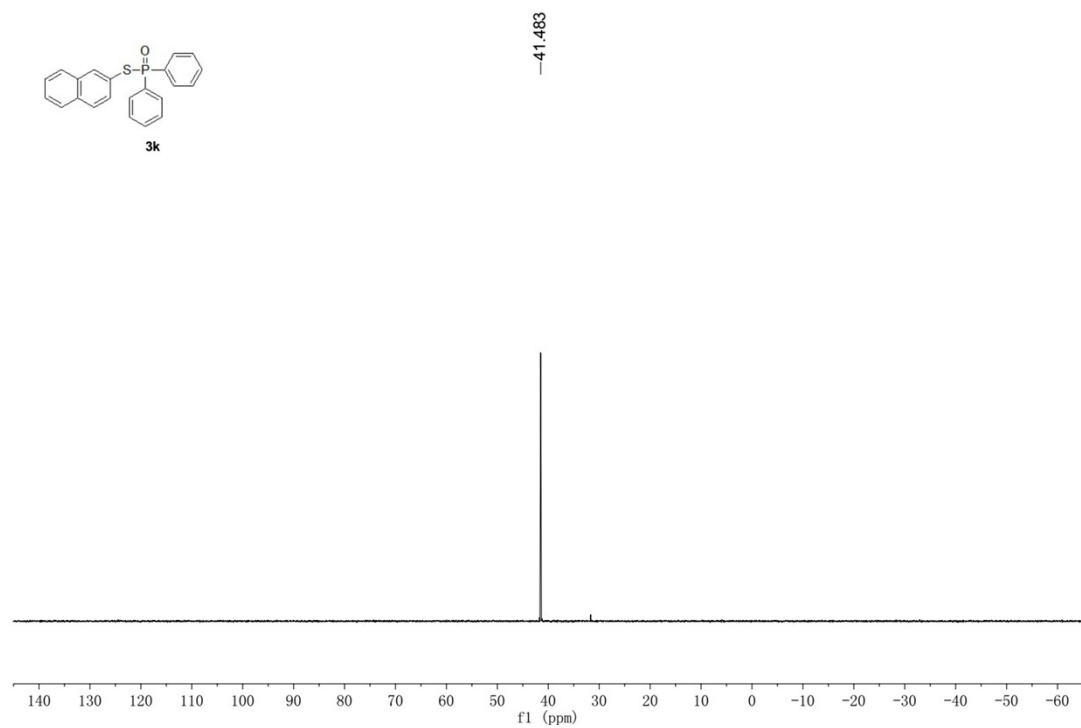

<sup>31</sup>P NMR spectrum of compound **3k**



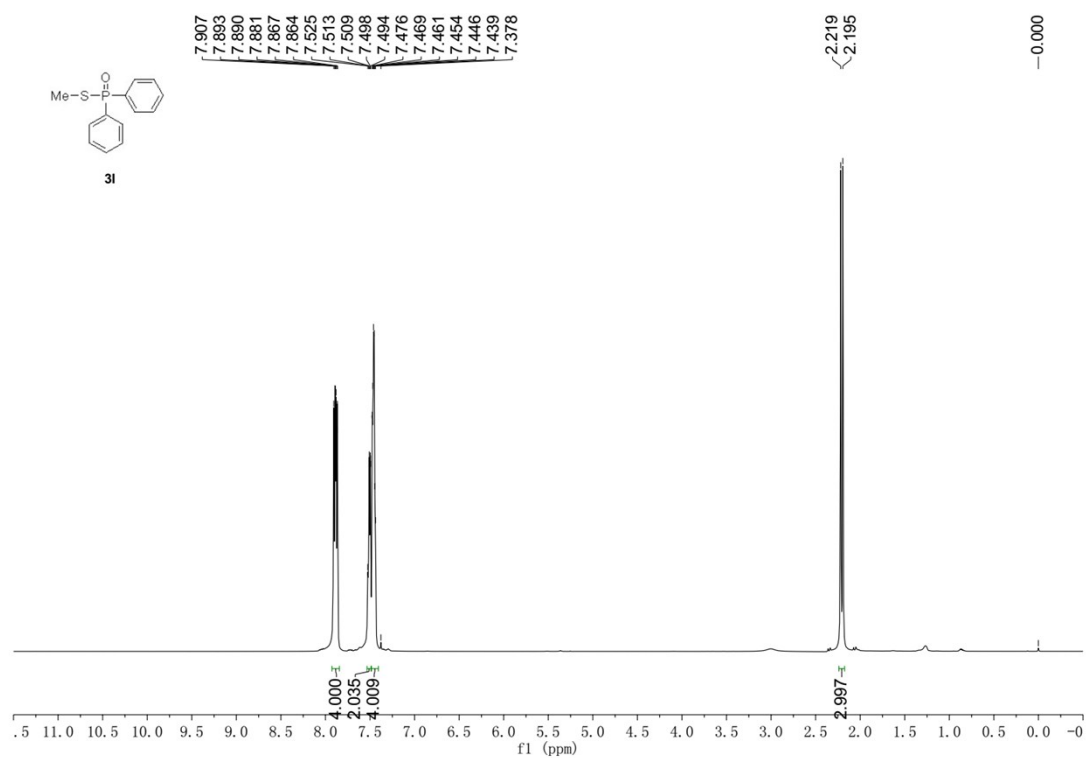

<sup>1</sup>H NMR spectrum of compound **31**

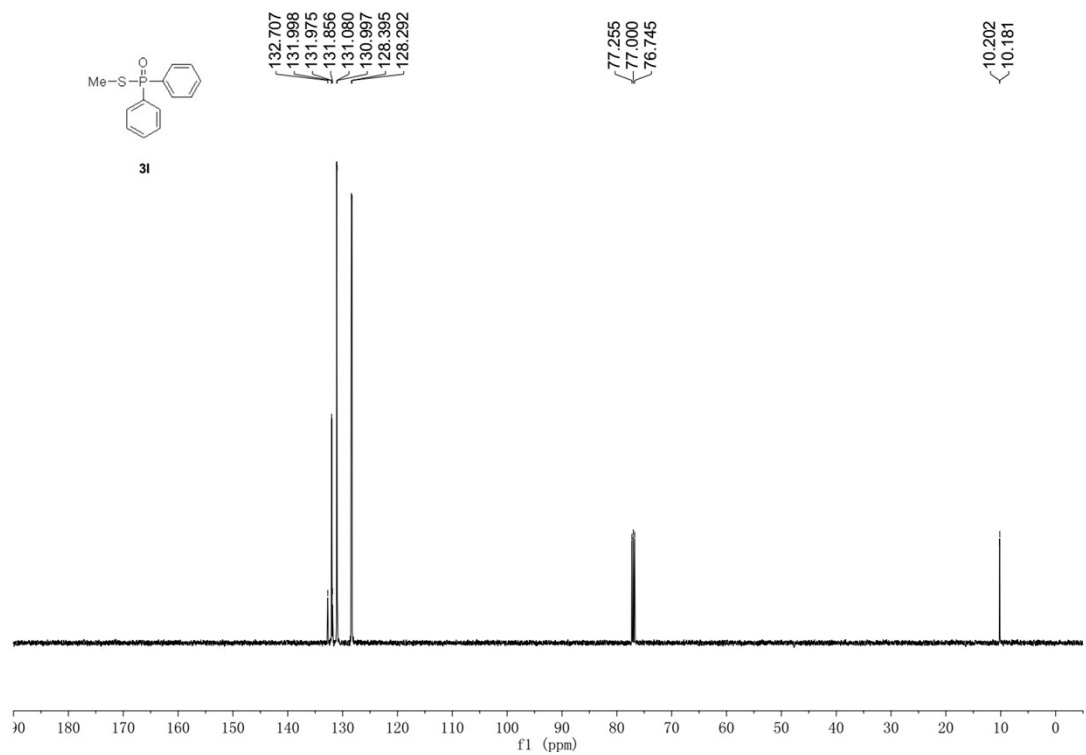

<sup>13</sup>C NMR spectrum of compound **31**

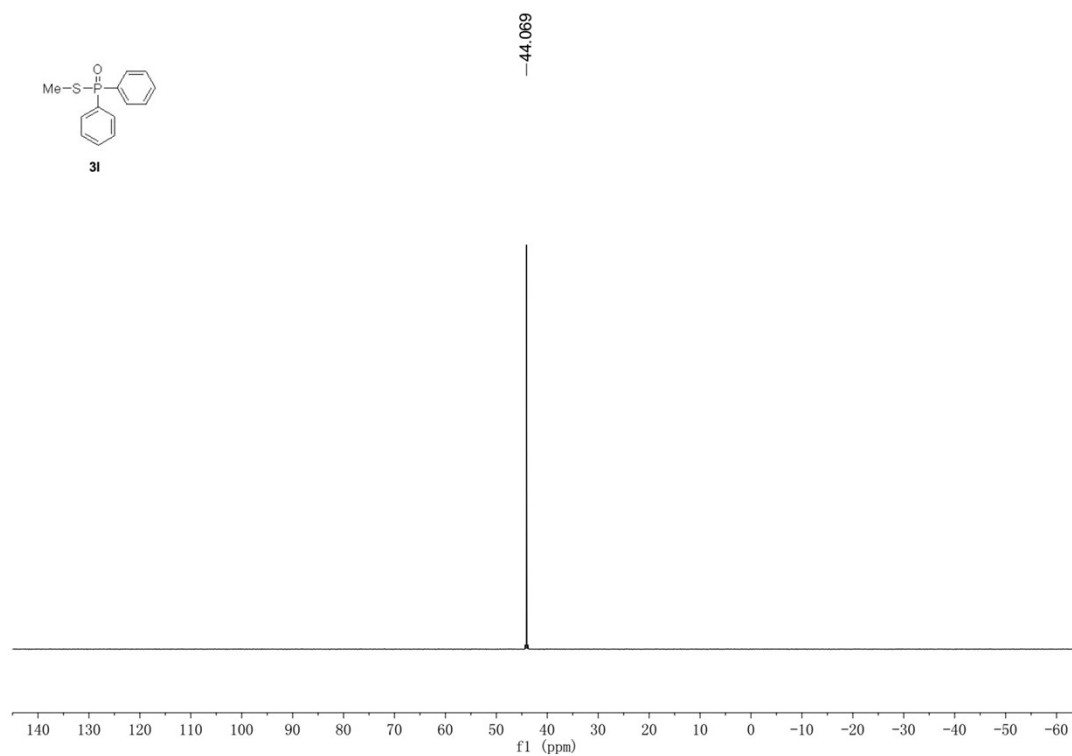

$^{31}\text{P}$  NMR spectrum of compound **3l**

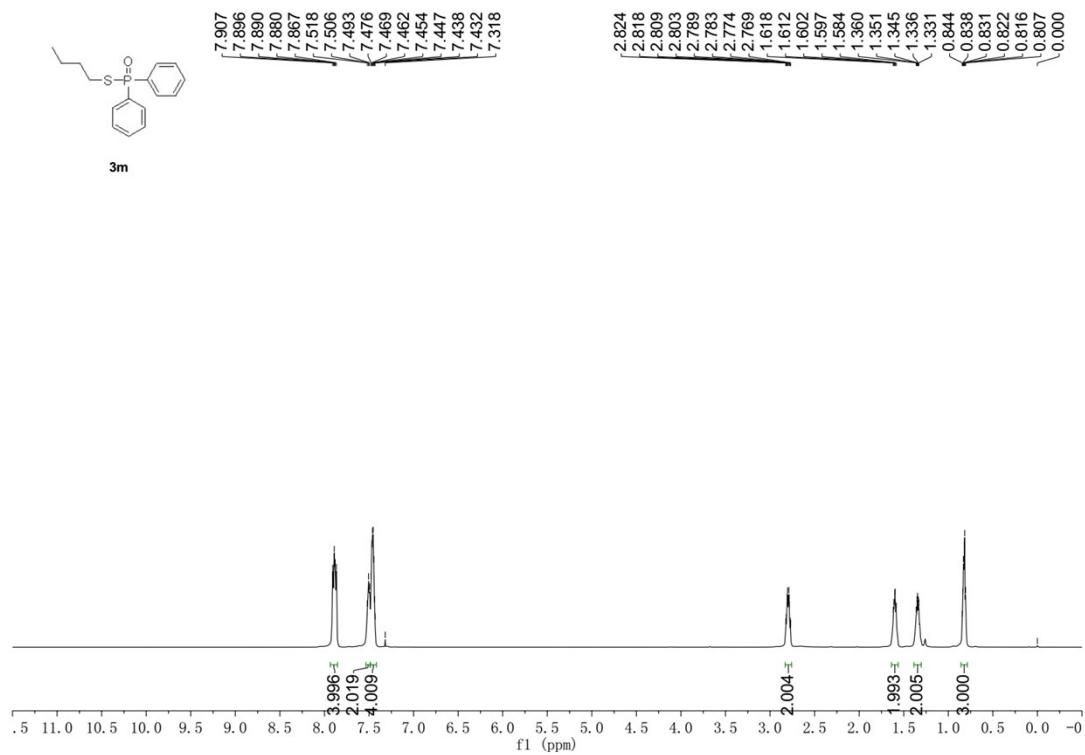

$^1\text{H}$  NMR spectrum of compound **3m**

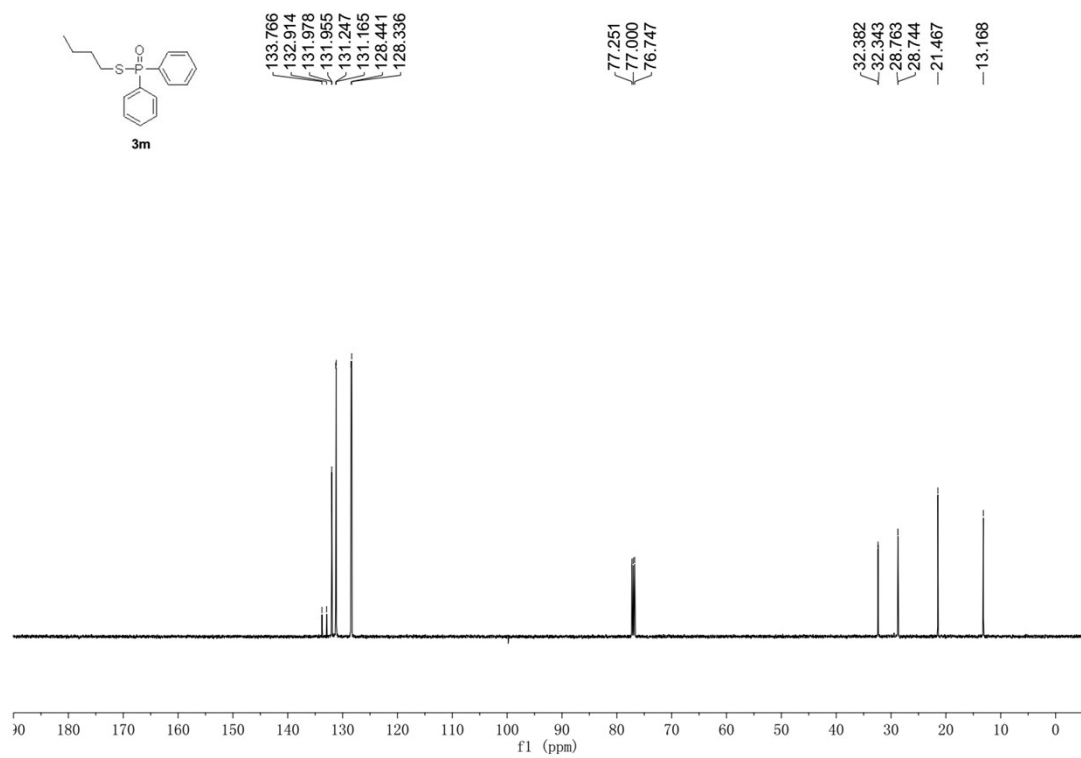

$^{13}\text{C}$  NMR spectrum of compound **3m**

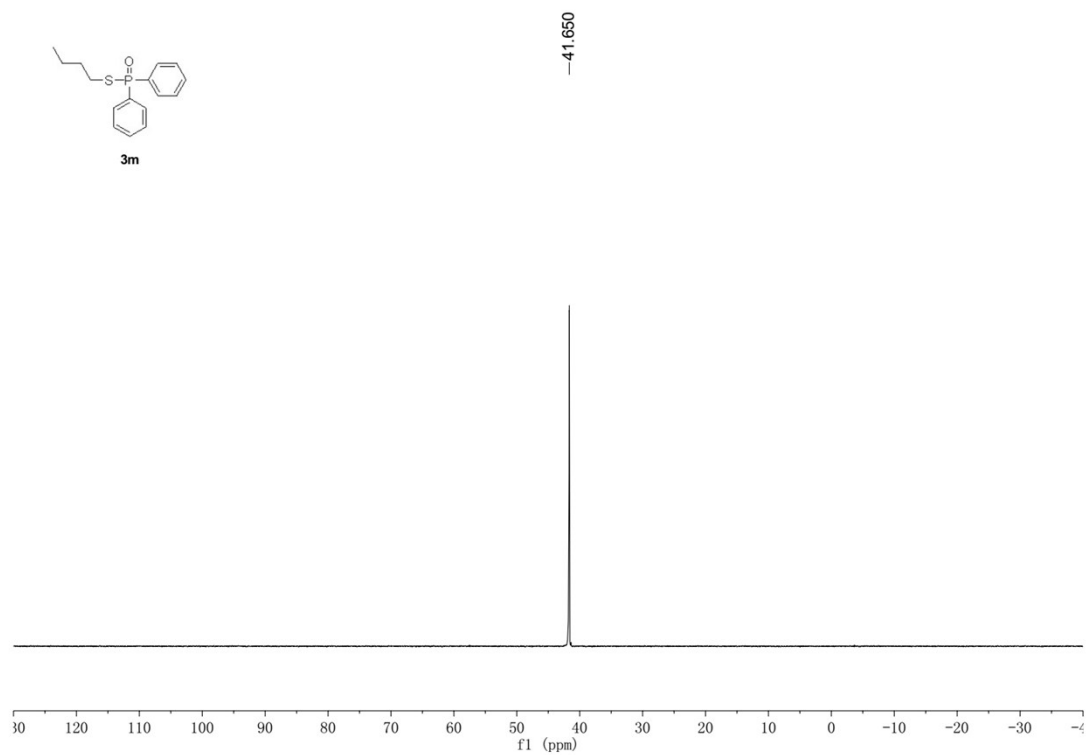

$^{31}\text{P}$  NMR spectrum of compound **3m**

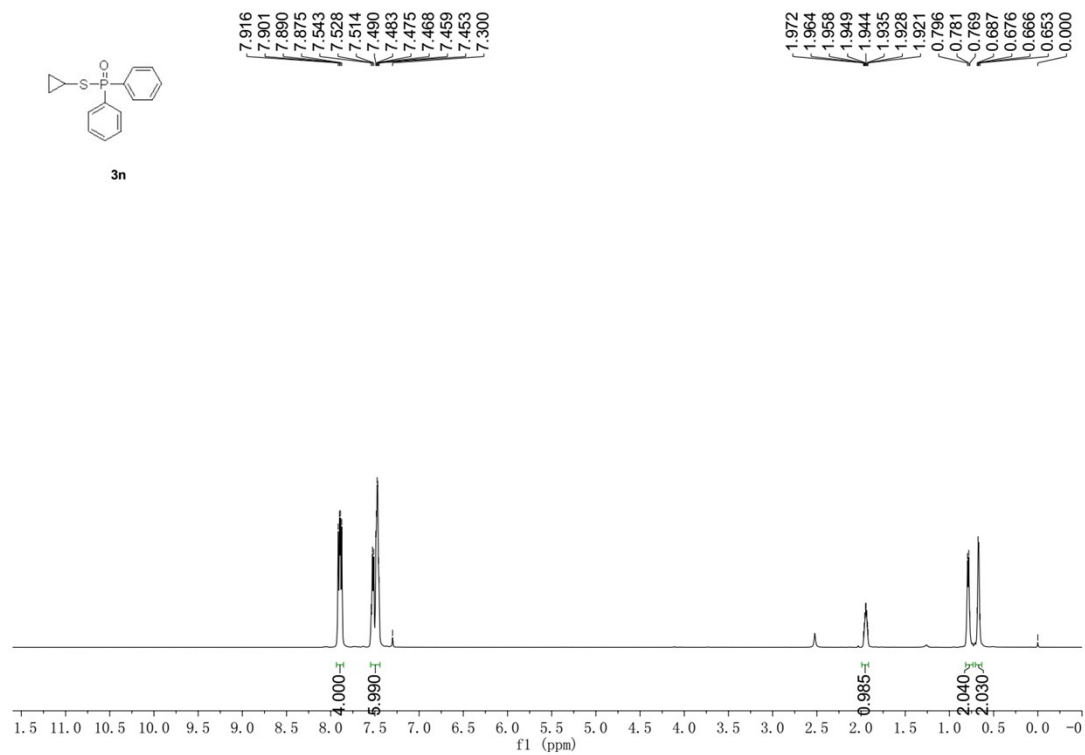

<sup>1</sup>H NMR spectrum of compound **3n**

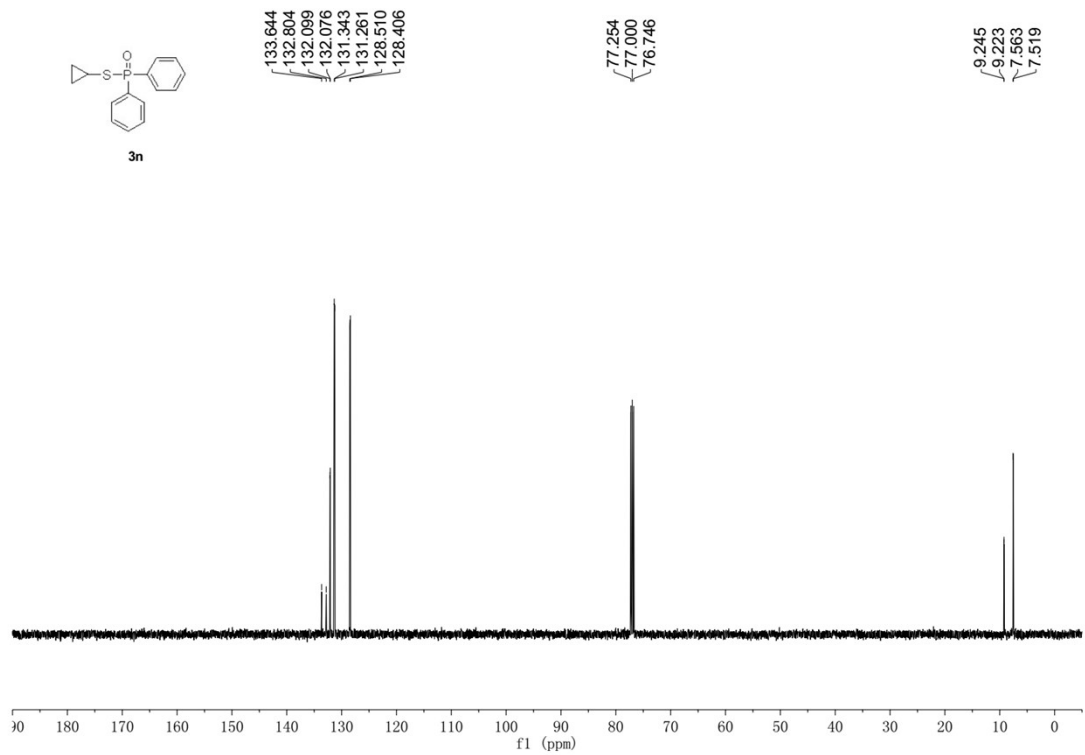

<sup>13</sup>C NMR spectrum of compound **3n**

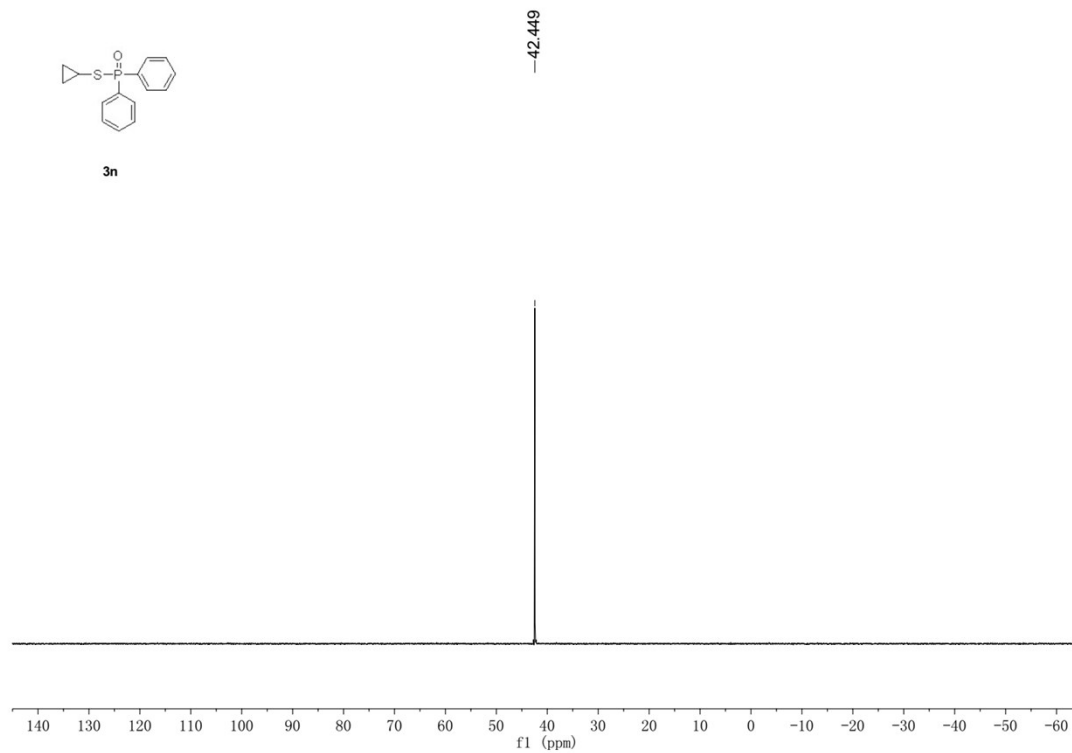

$^{31}\text{P}$  NMR spectrum of compound **3n**

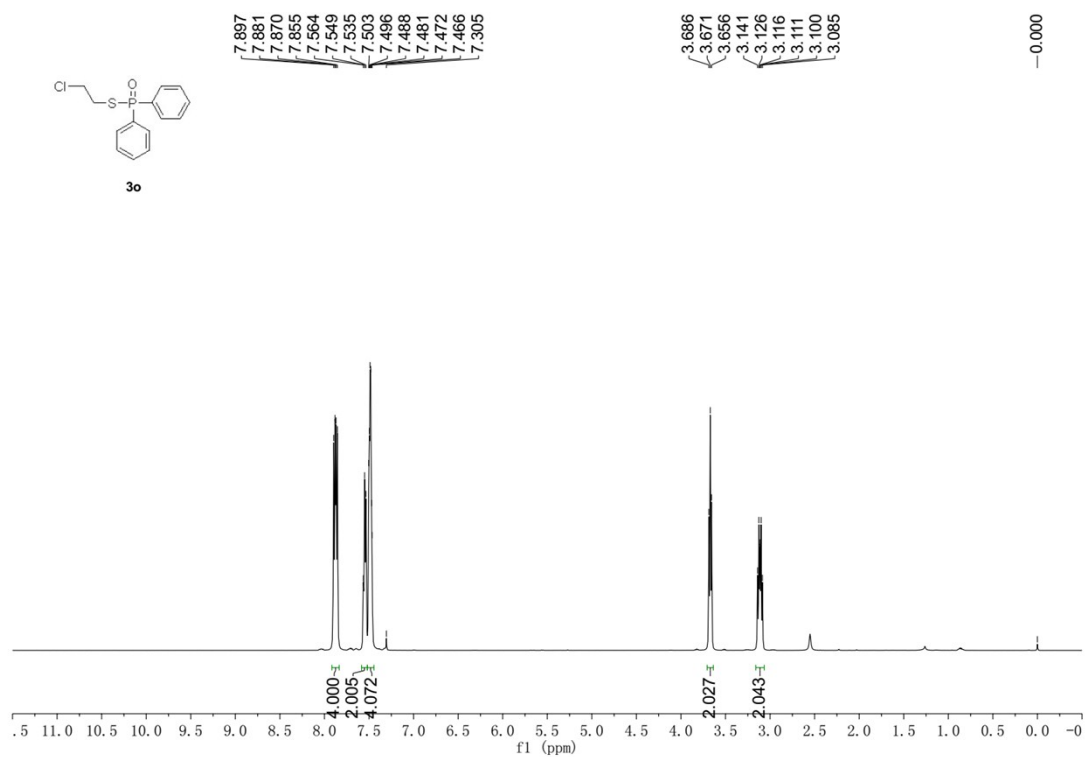

$^1\text{H}$  NMR spectrum of compound **3o**

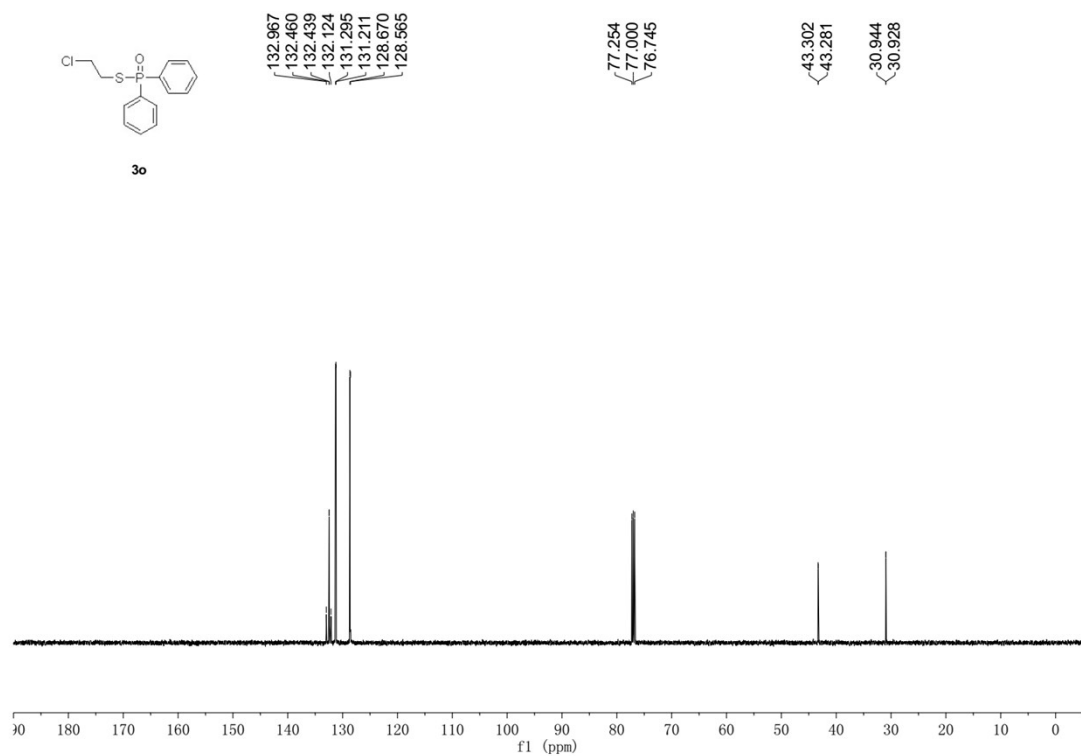

<sup>13</sup>C NMR spectrum of compound **3o**

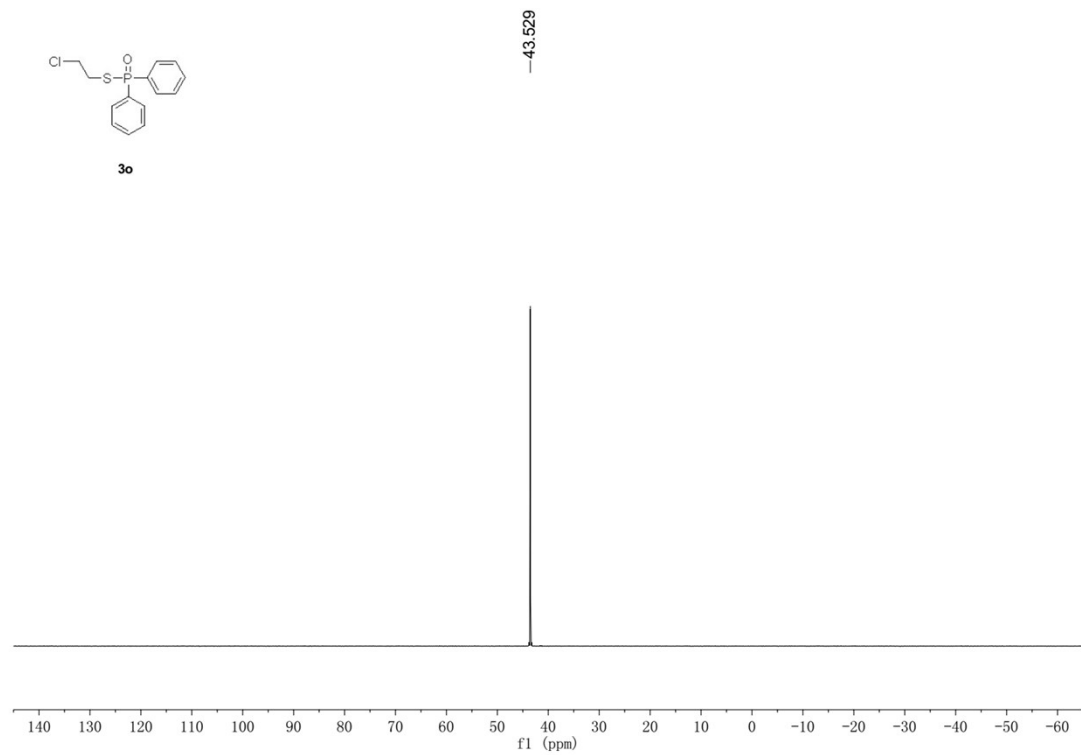

<sup>31</sup>P NMR spectrum of compound **3o**

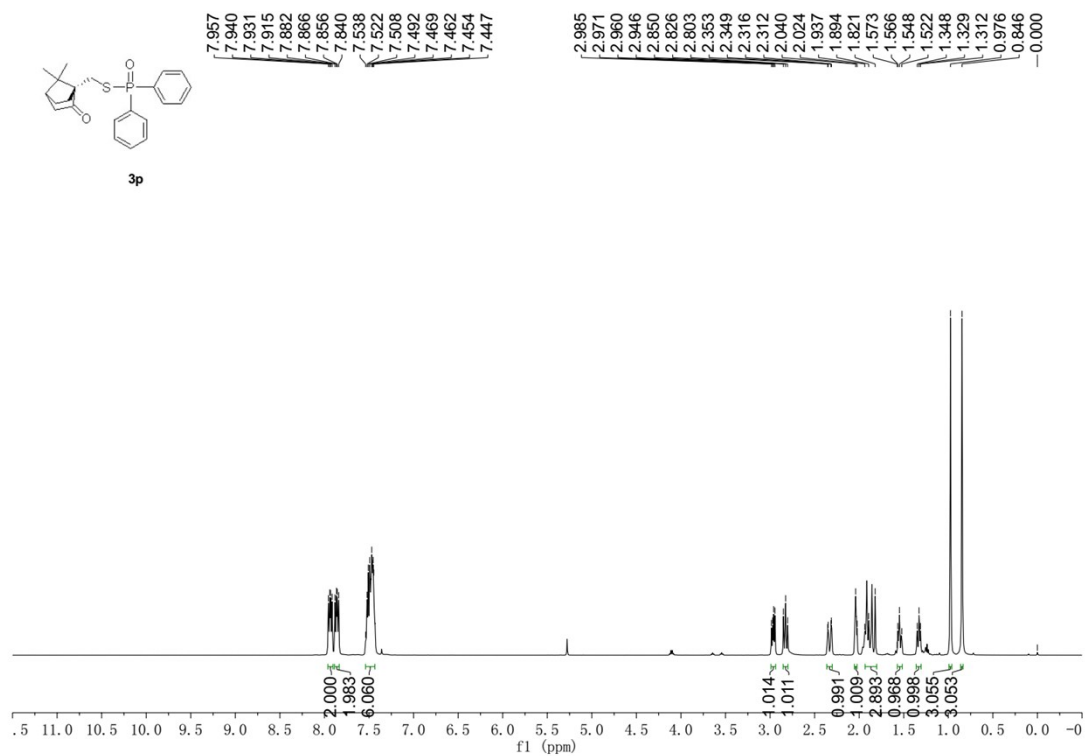

<sup>1</sup>H NMR spectrum of compound 3p

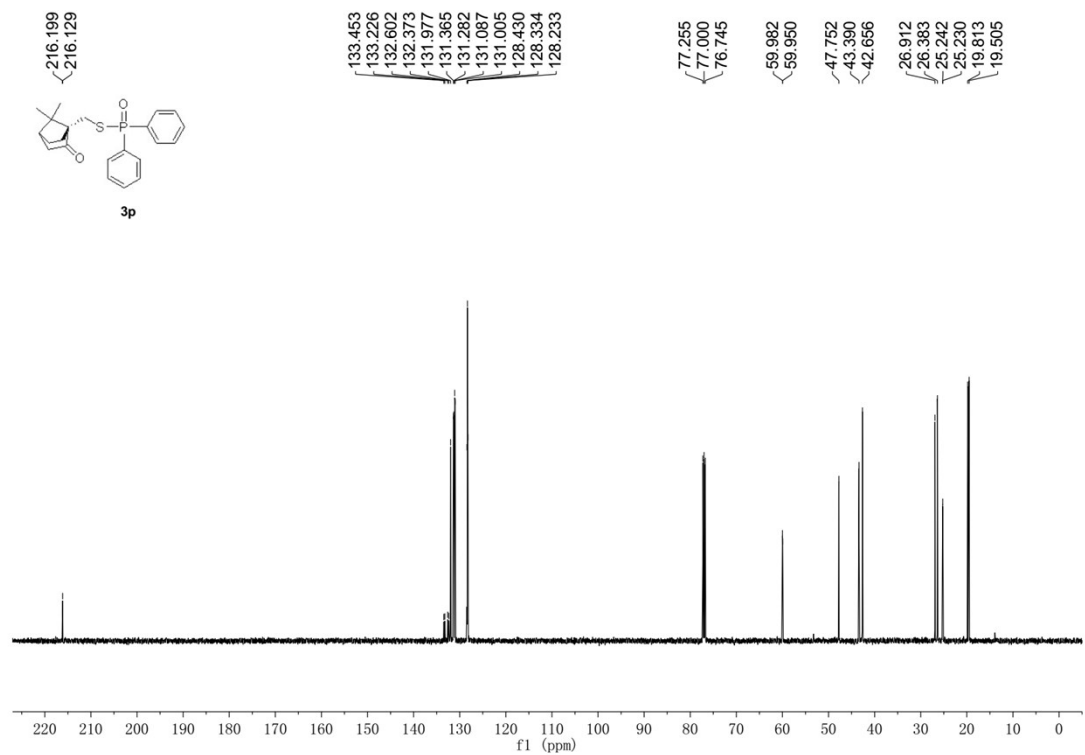

<sup>13</sup>C NMR spectrum of compound 3p

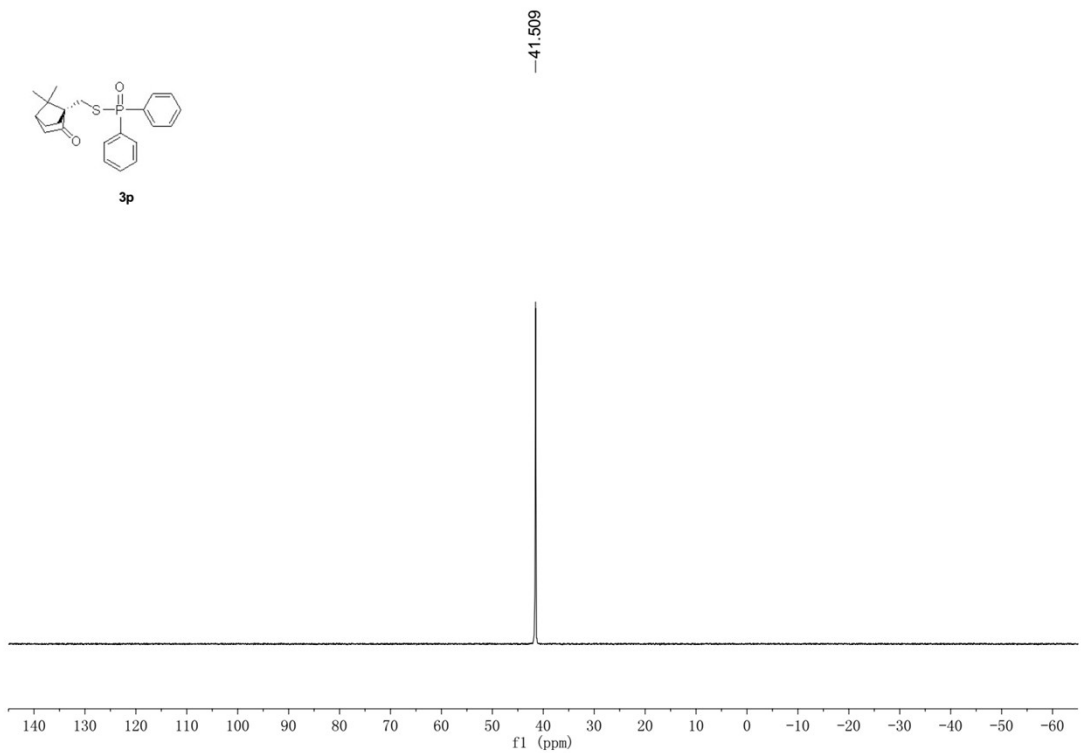

<sup>31</sup>P NMR spectrum of compound **3p**

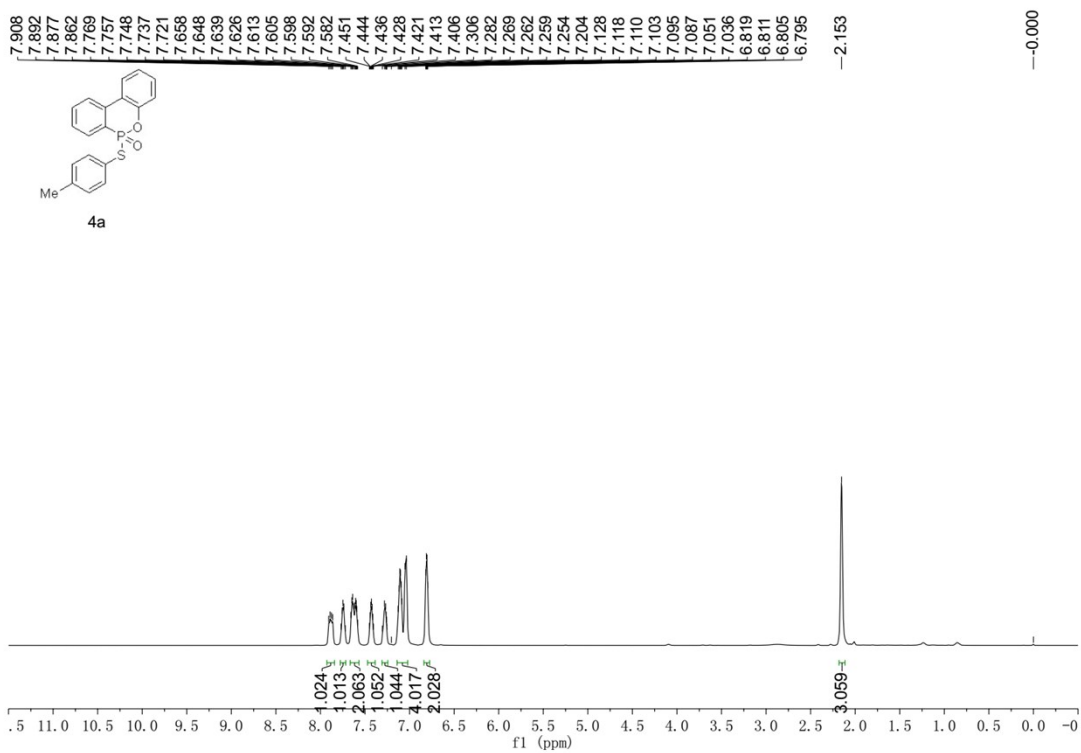

<sup>1</sup>H NMR spectrum of compound **4a**



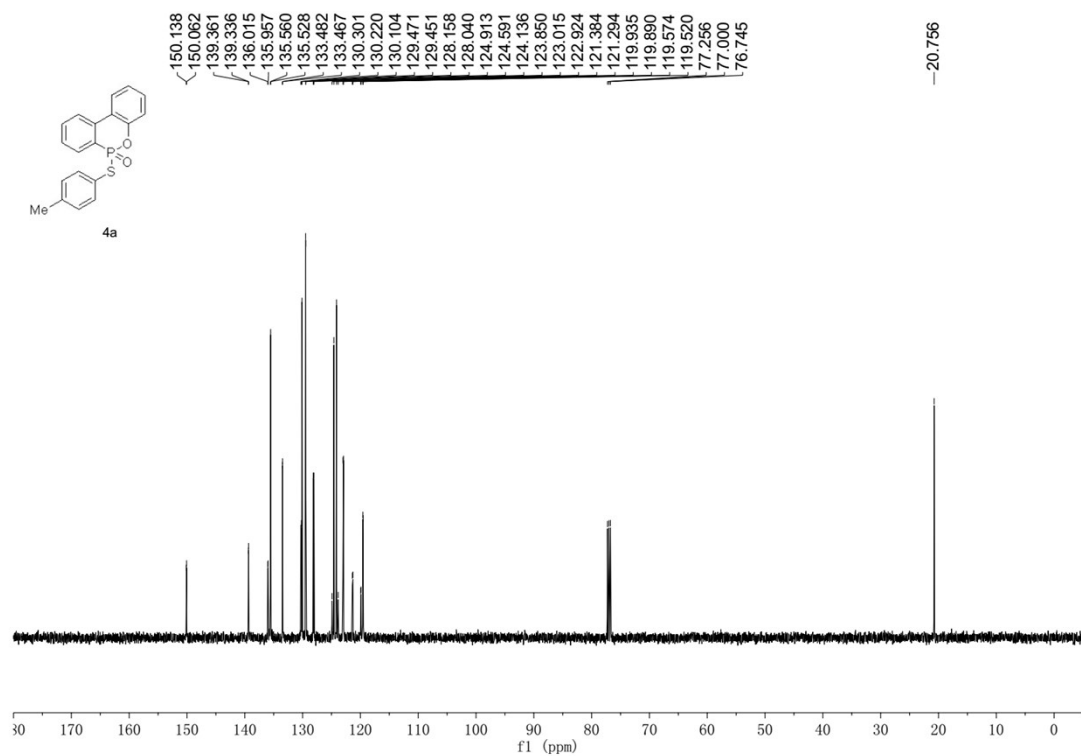

<sup>13</sup>C NMR spectrum of compound 4a

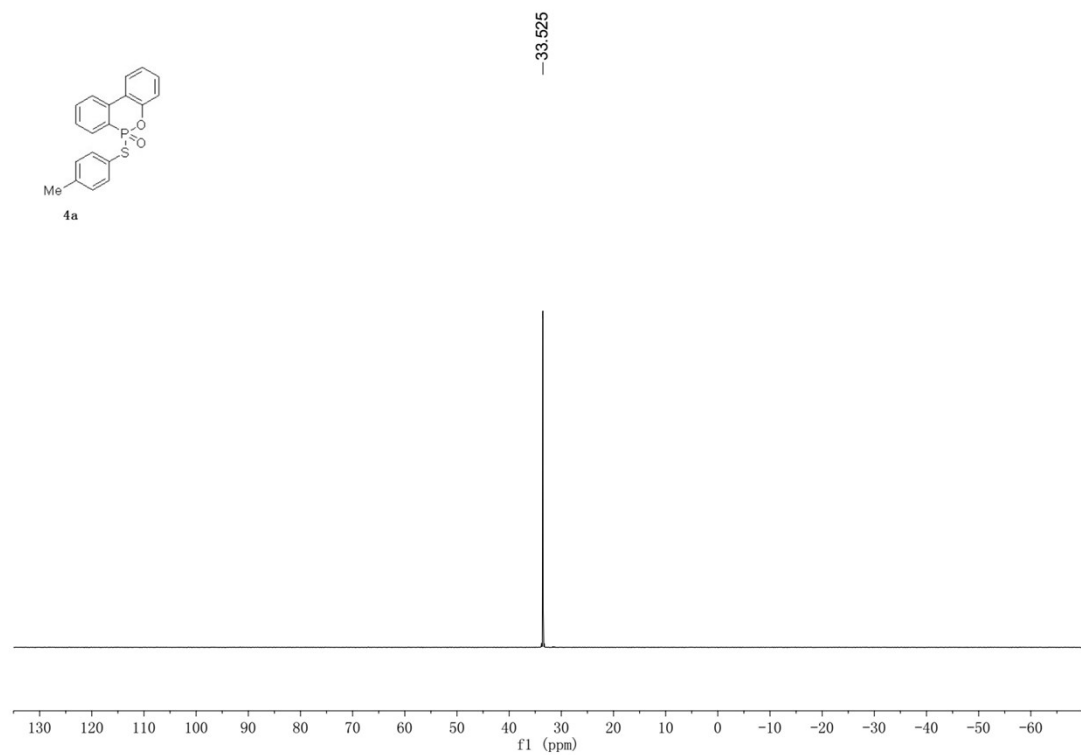

<sup>31</sup>P NMR spectrum of compound 4a

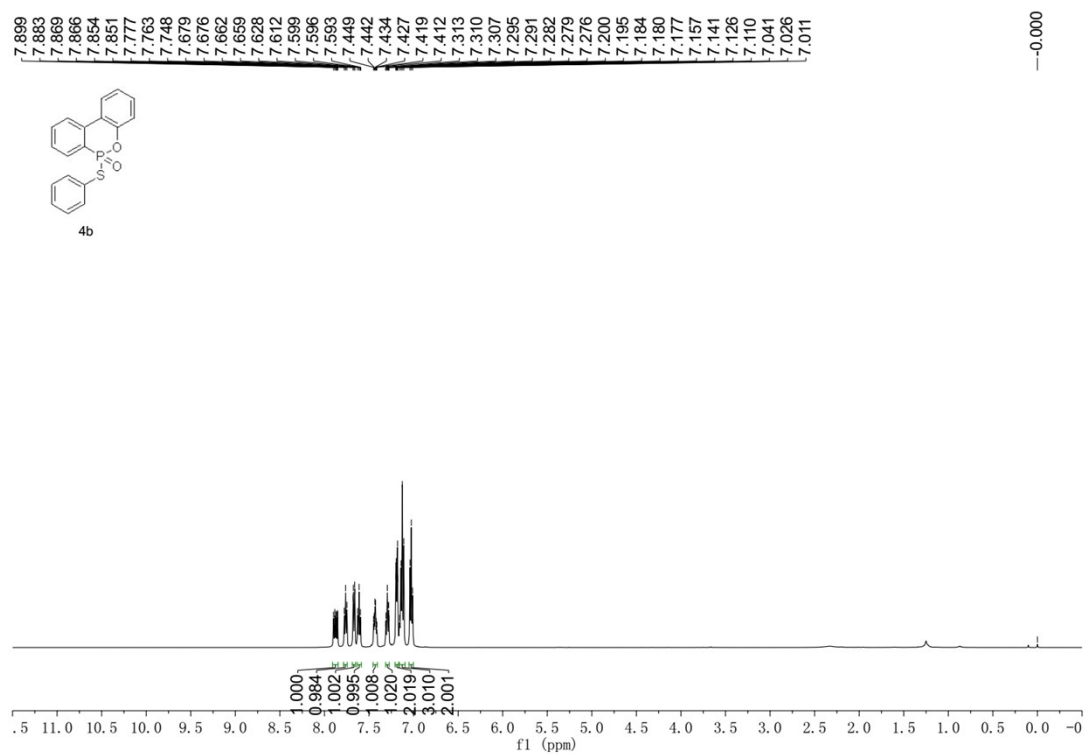

<sup>1</sup>H NMR spectrum of compound **4b**

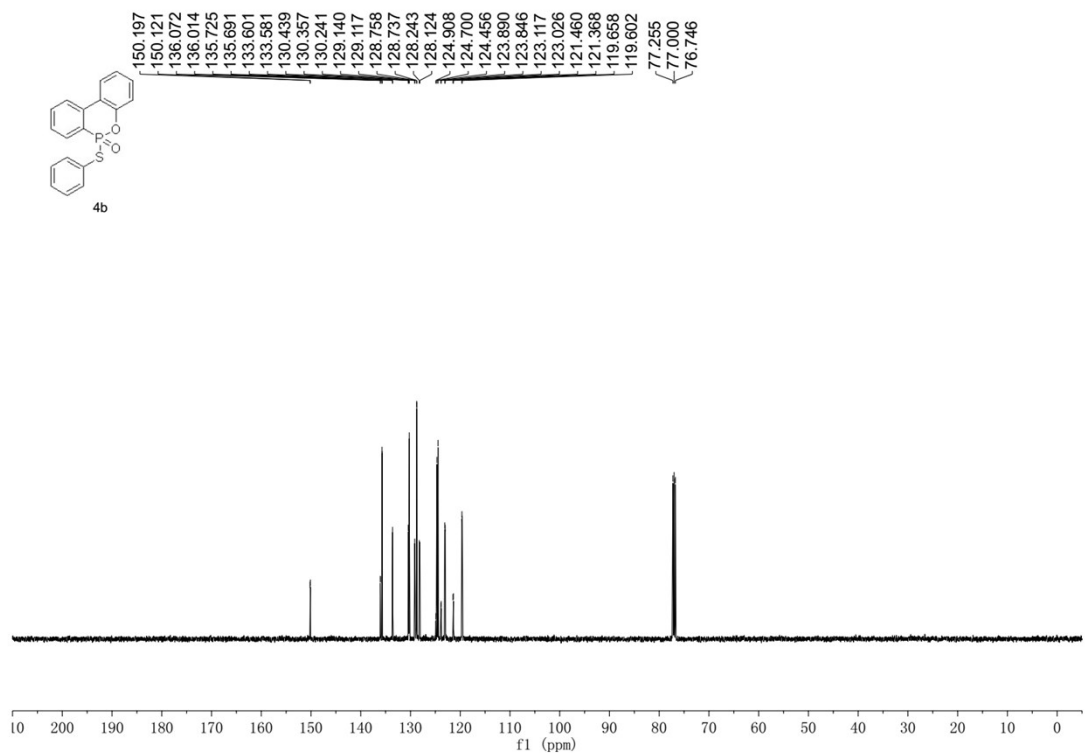

<sup>13</sup>C NMR spectrum of compound **4b**

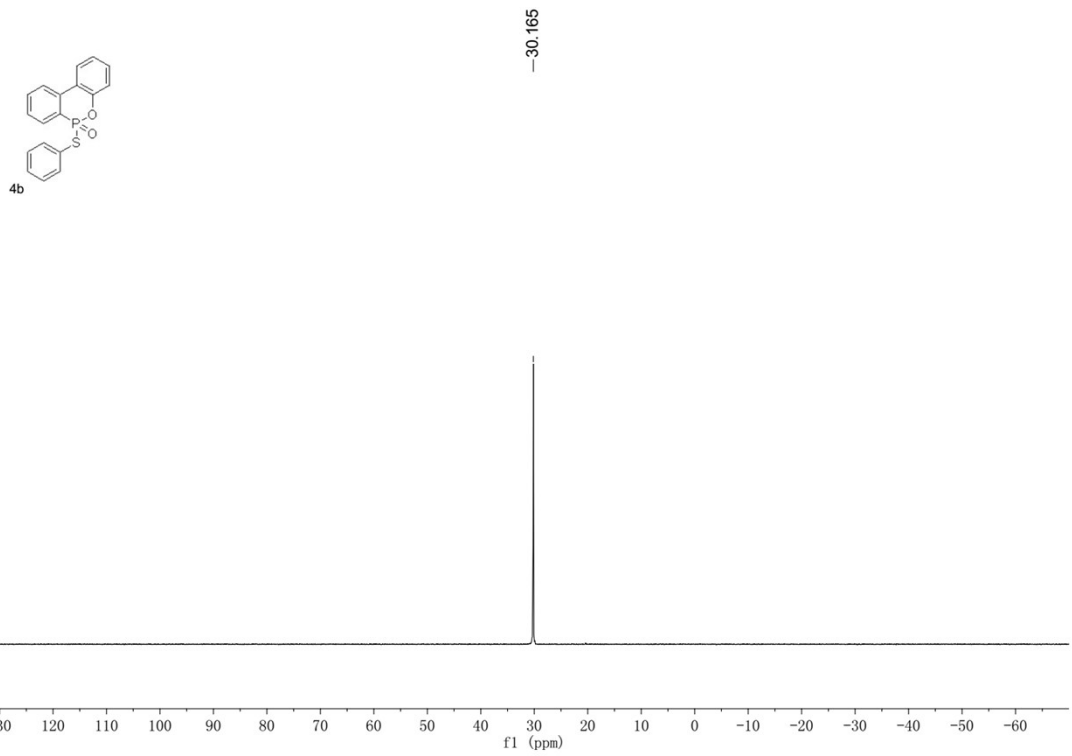

$^{31}\text{P}$  NMR spectrum of compound **4b**

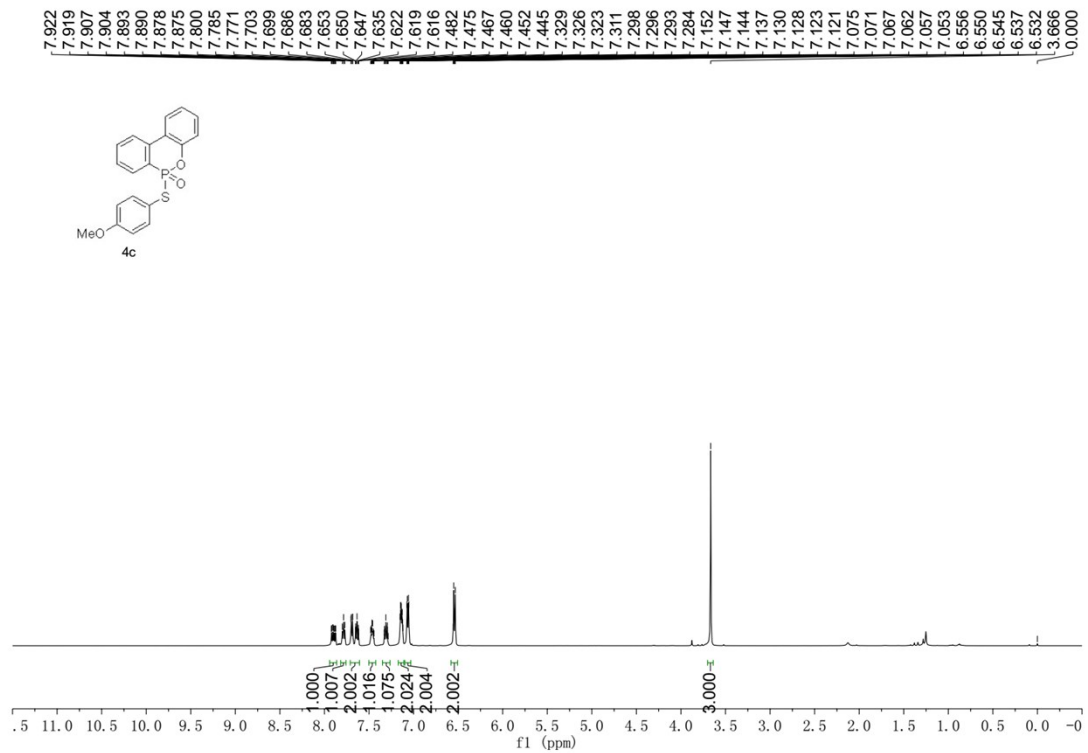

$^1\text{H}$  NMR spectrum of compound **4c**

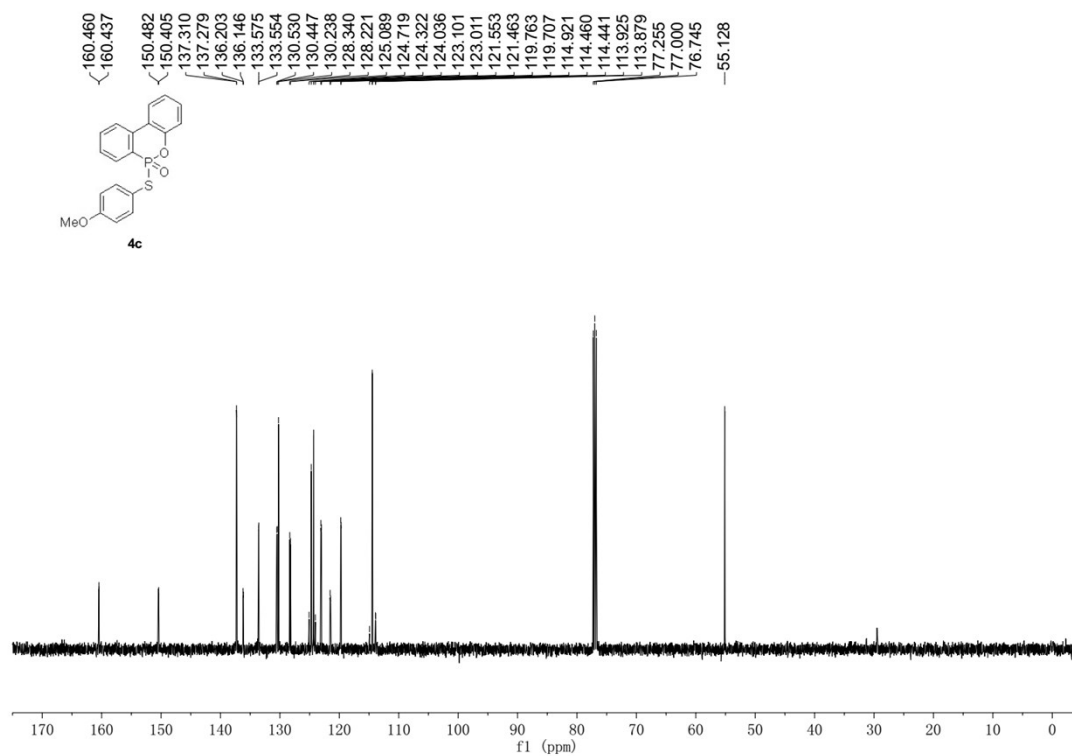

$^{13}\text{C}$  NMR spectrum of compound **4c**

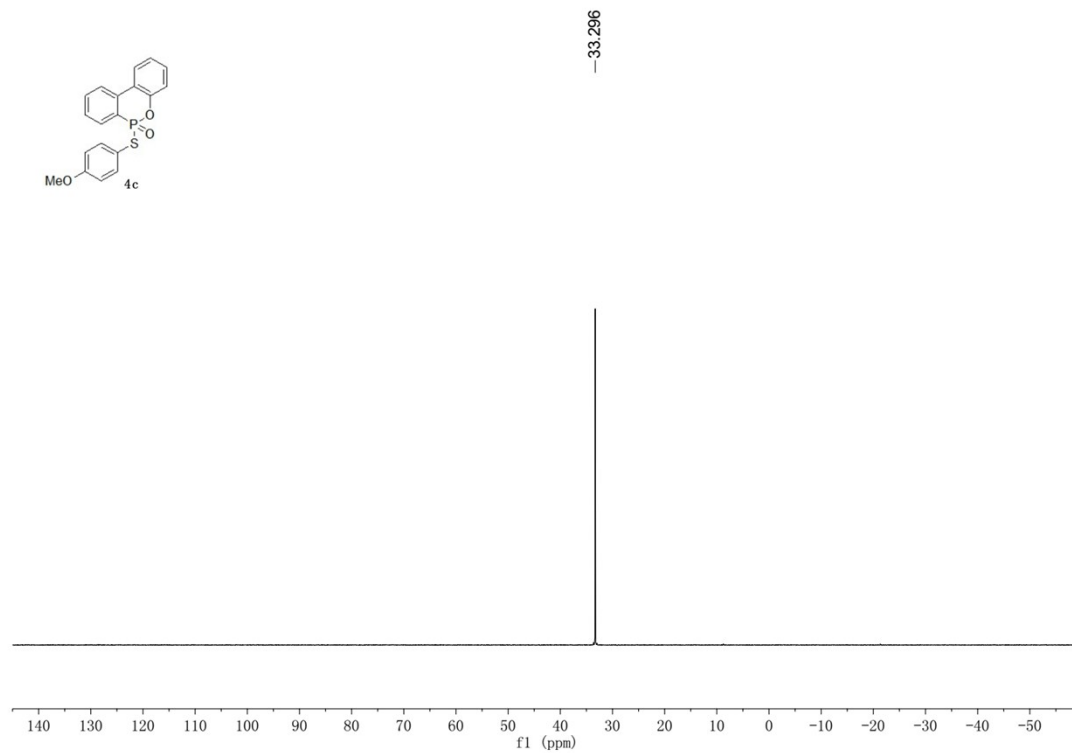

$^{31}\text{P}$  NMR spectrum of compound **4c**

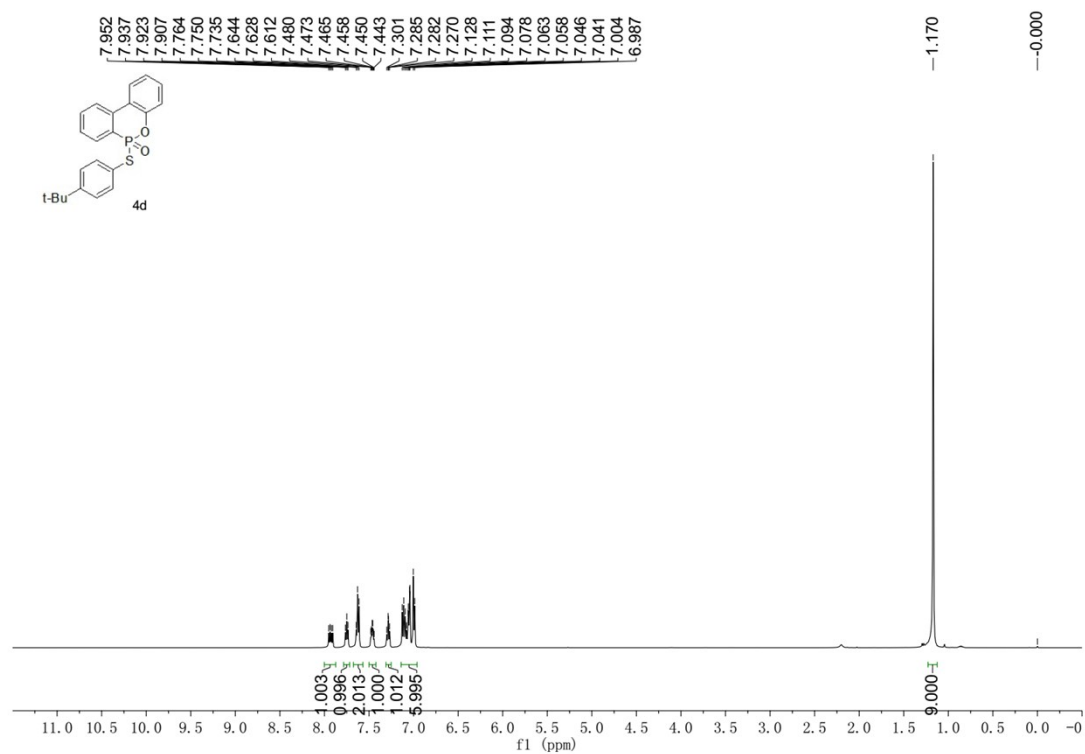

<sup>1</sup>H NMR spectrum of compound **4d**

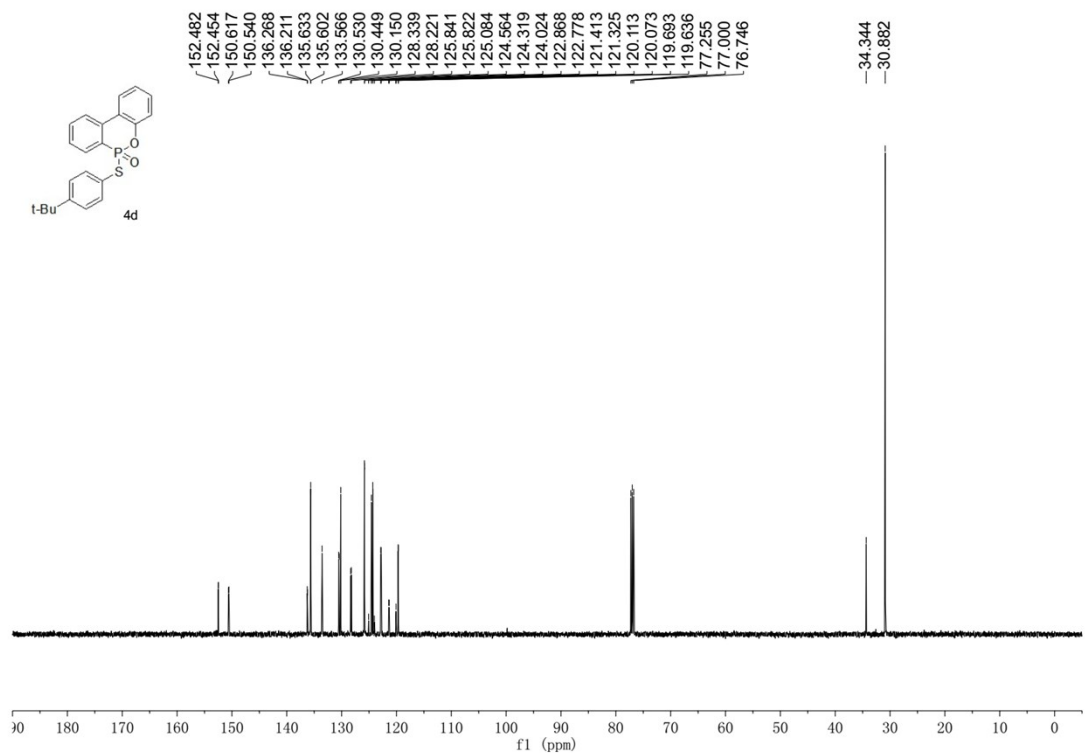

<sup>13</sup>C NMR spectrum of compound **4d**

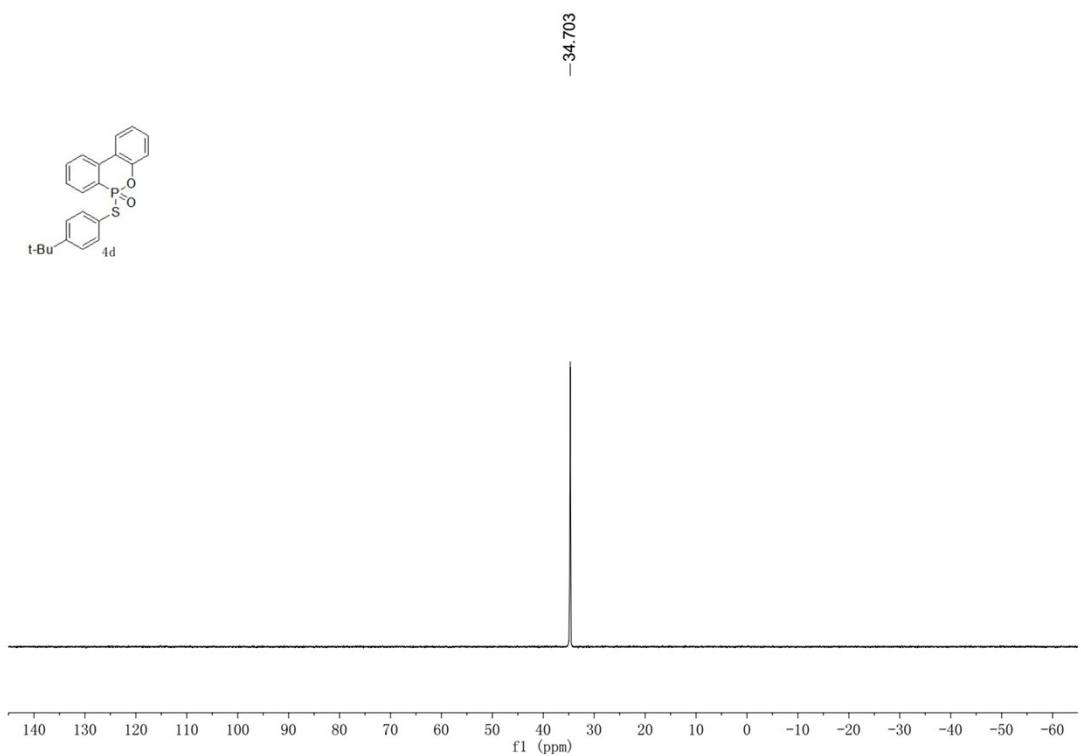

$^{31}\text{P}$  NMR spectrum of compound **4d**

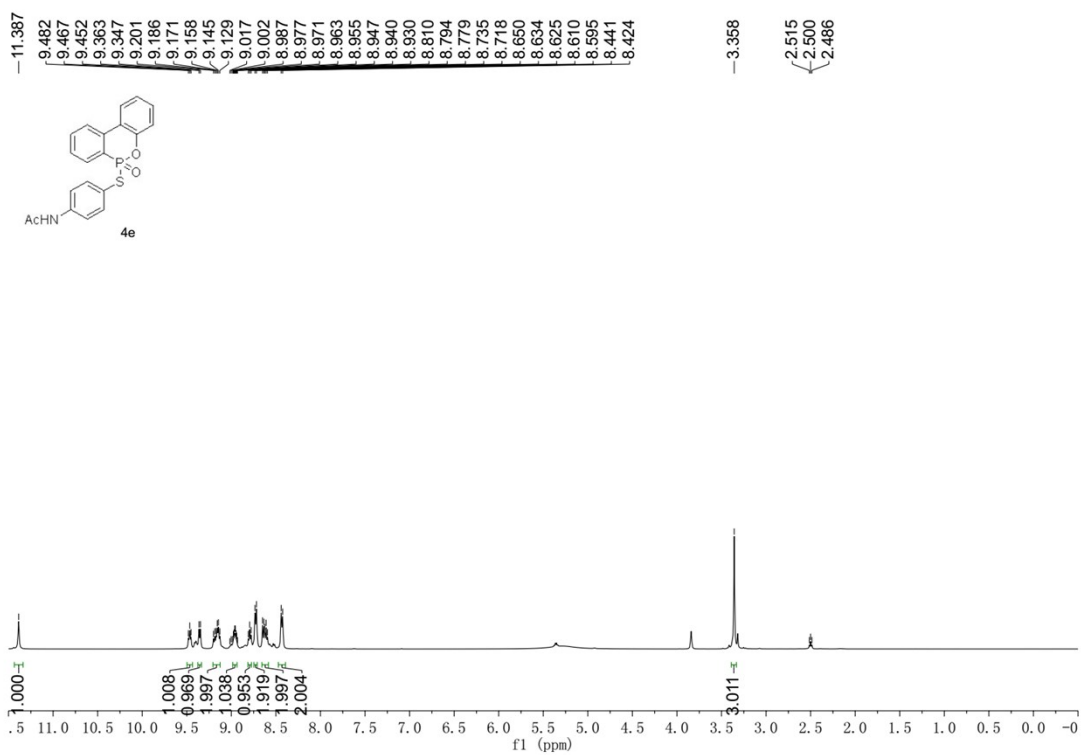

$^1\text{H}$  NMR spectrum of compound **4e**

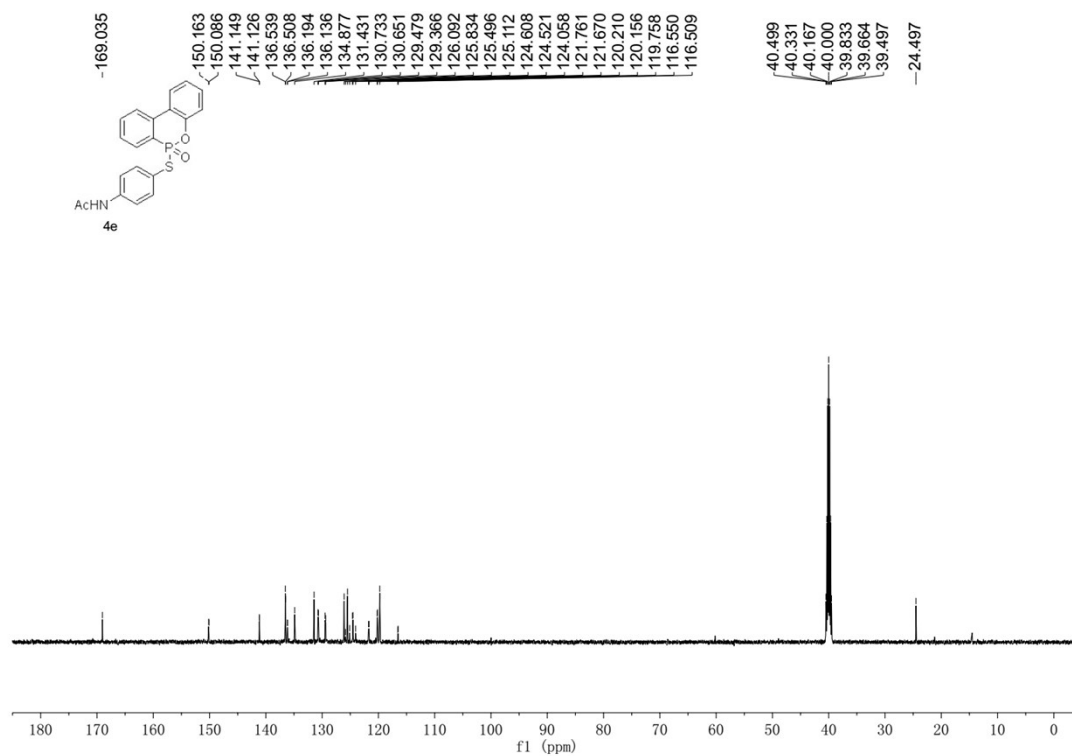

<sup>13</sup>C NMR spectrum of compound **4e**

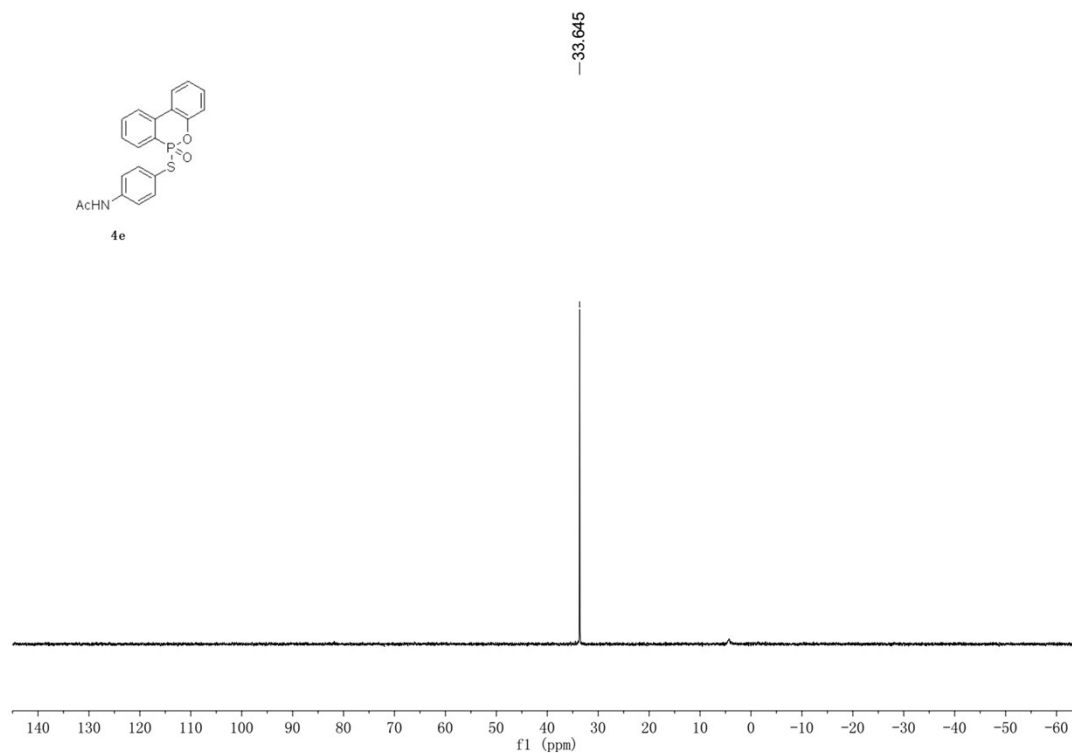

<sup>31</sup>P NMR spectrum of compound **4e**

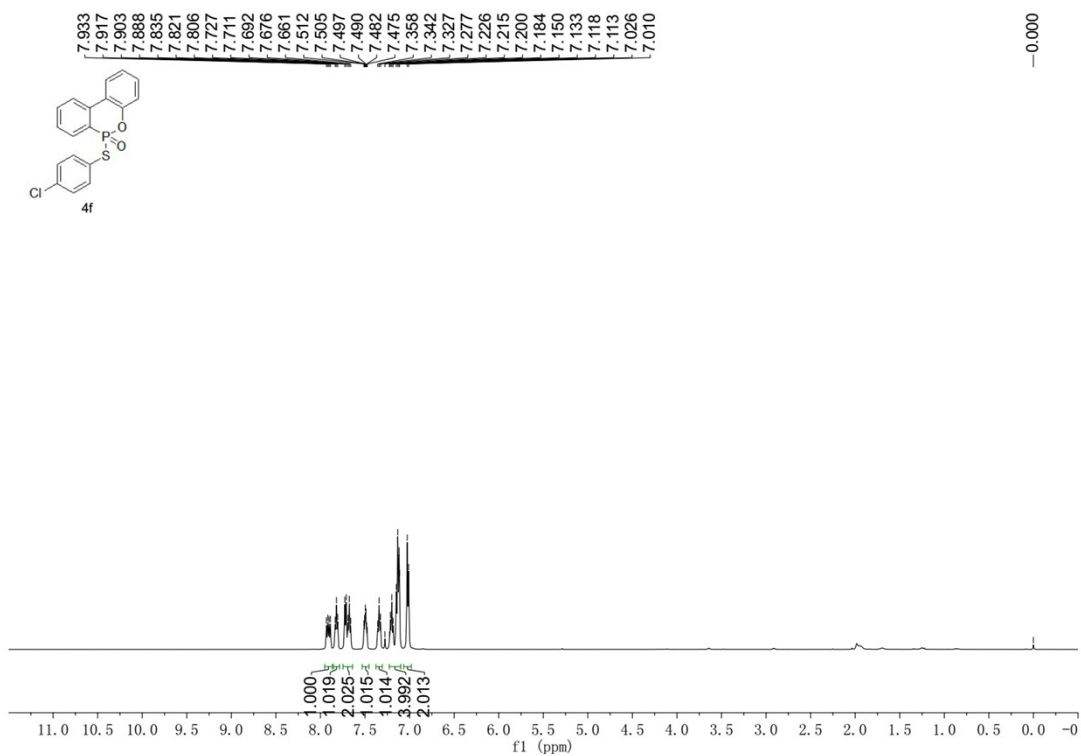

<sup>1</sup>H NMR spectrum of compound **4f**

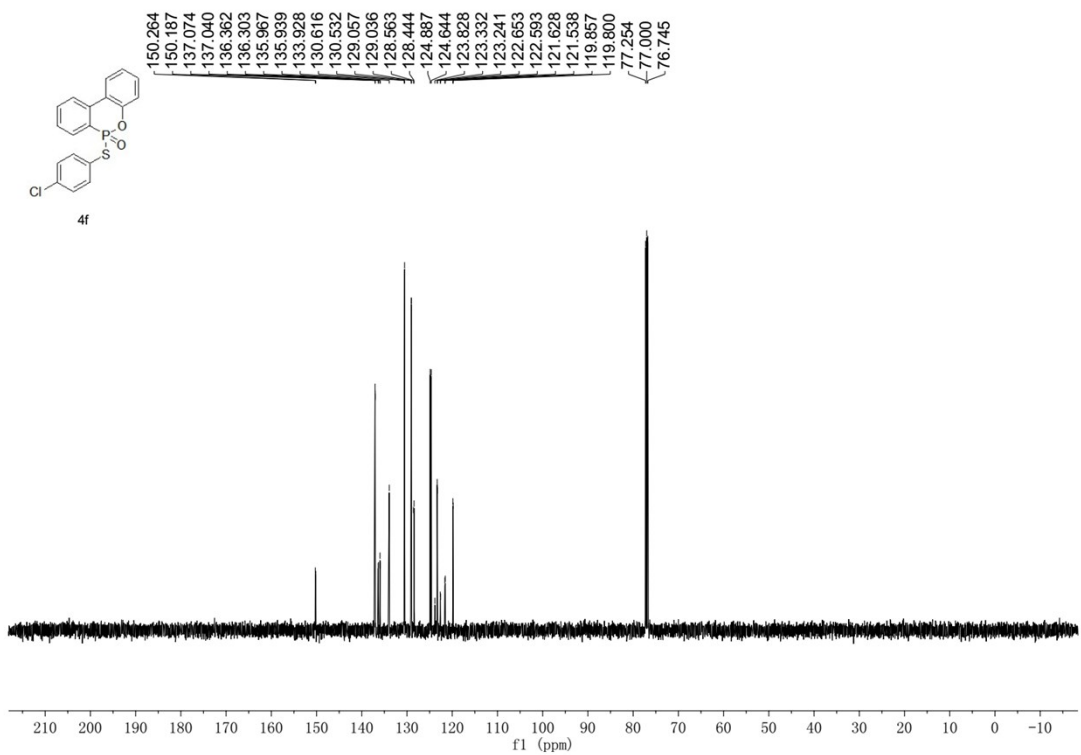

<sup>13</sup>C NMR spectrum of compound **4f**



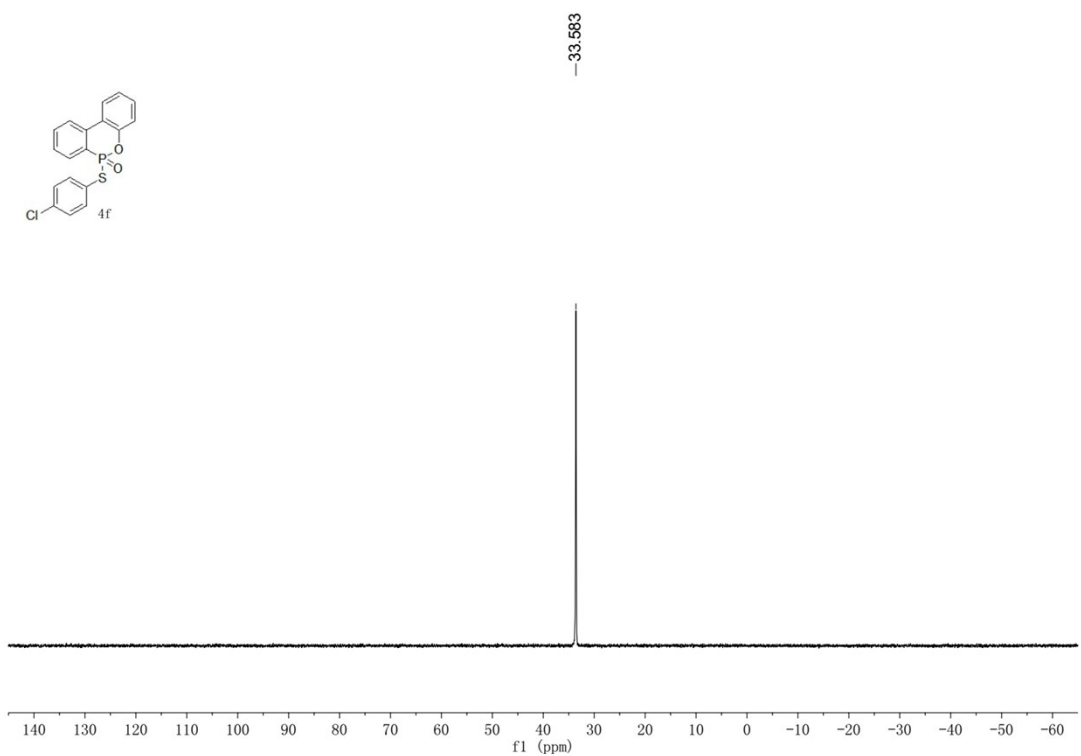

$^{31}\text{P}$  NMR spectrum of compound **4f**

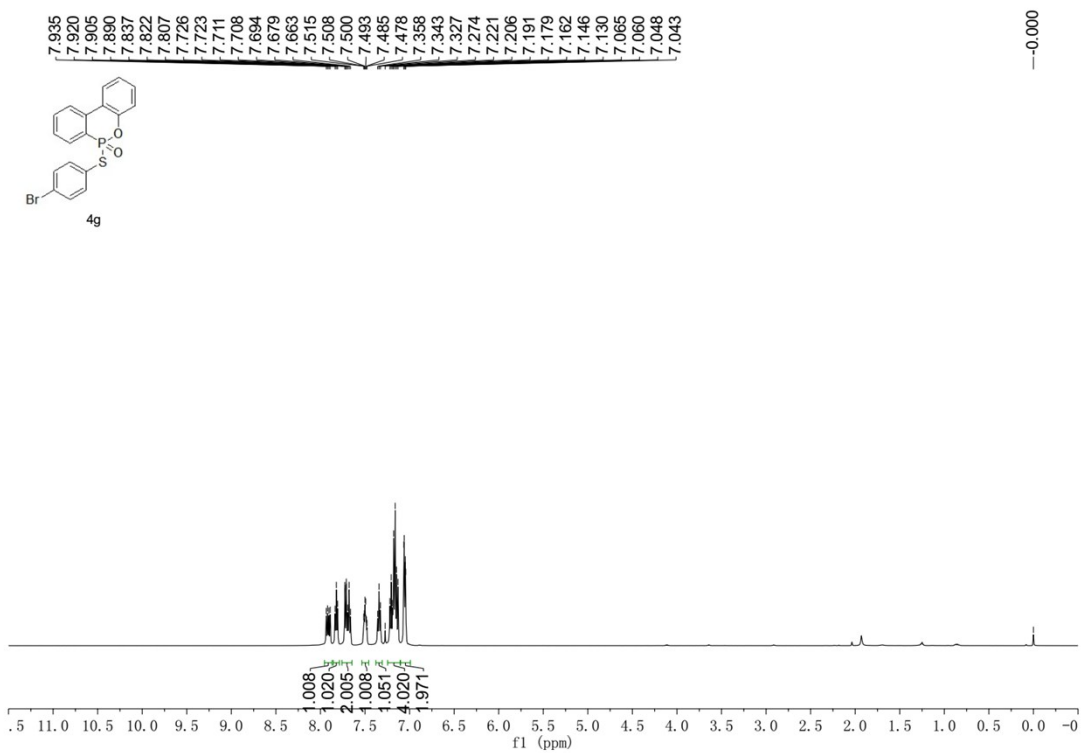

$^1\text{H}$  NMR spectrum of compound **4g**

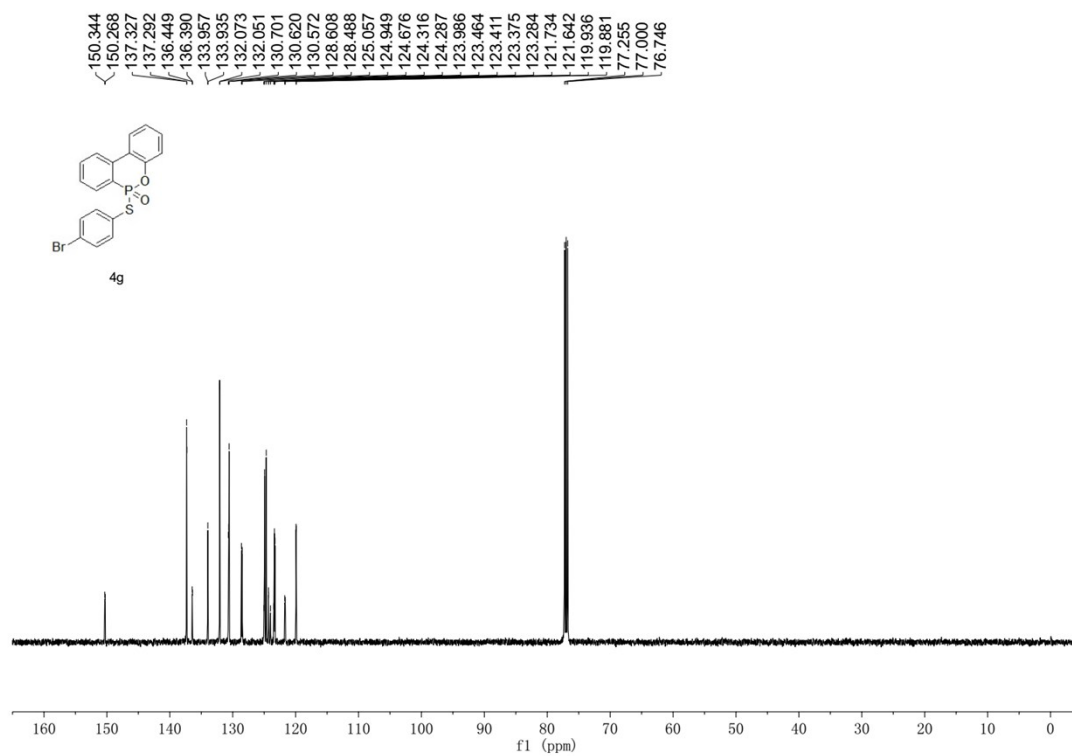

**<sup>13</sup>C NMR spectrum of compound 4g**

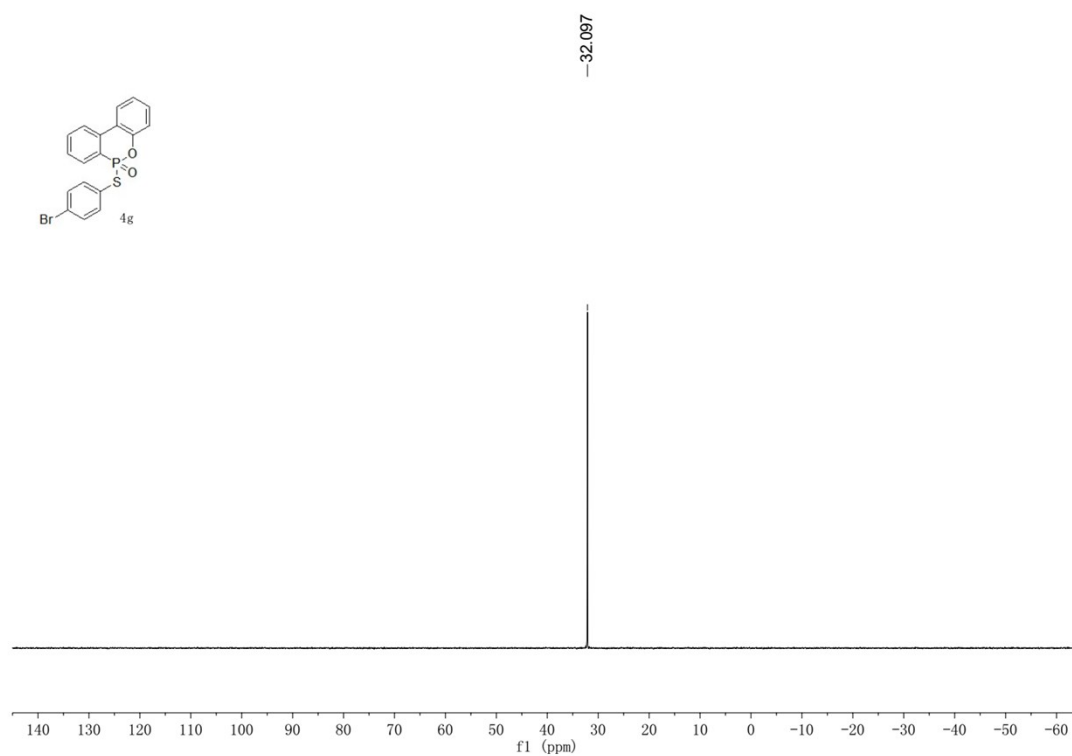

**<sup>31</sup>P NMR spectrum of compound 4g**

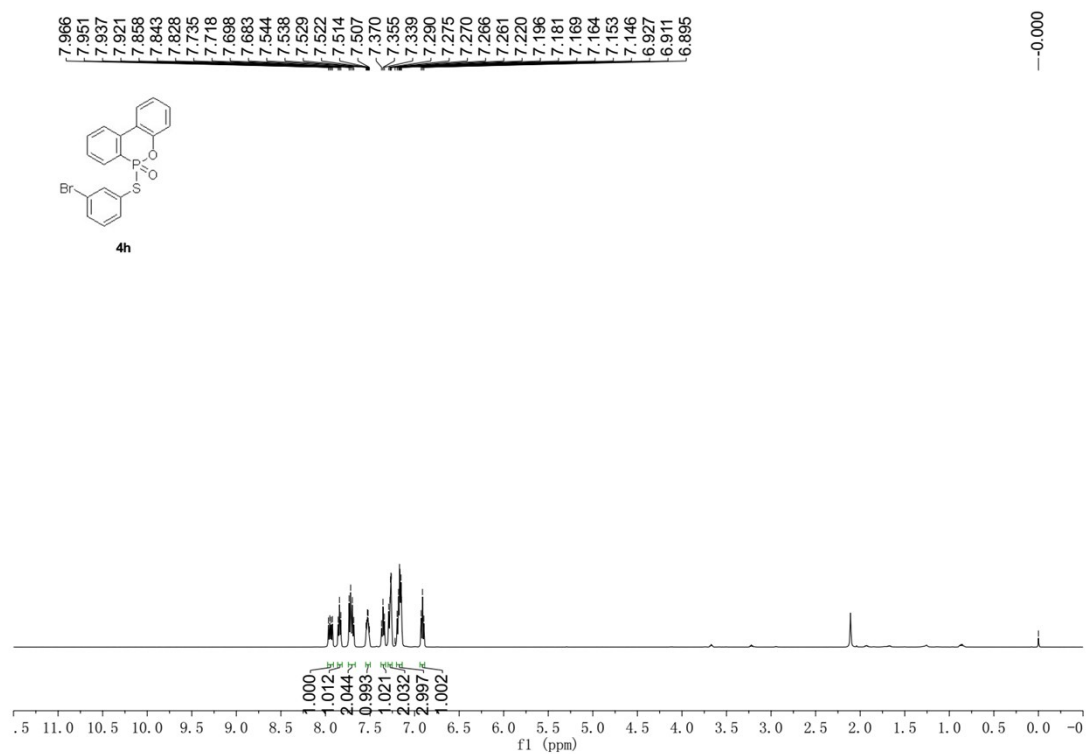

<sup>1</sup>H NMR spectrum of compound **4h**

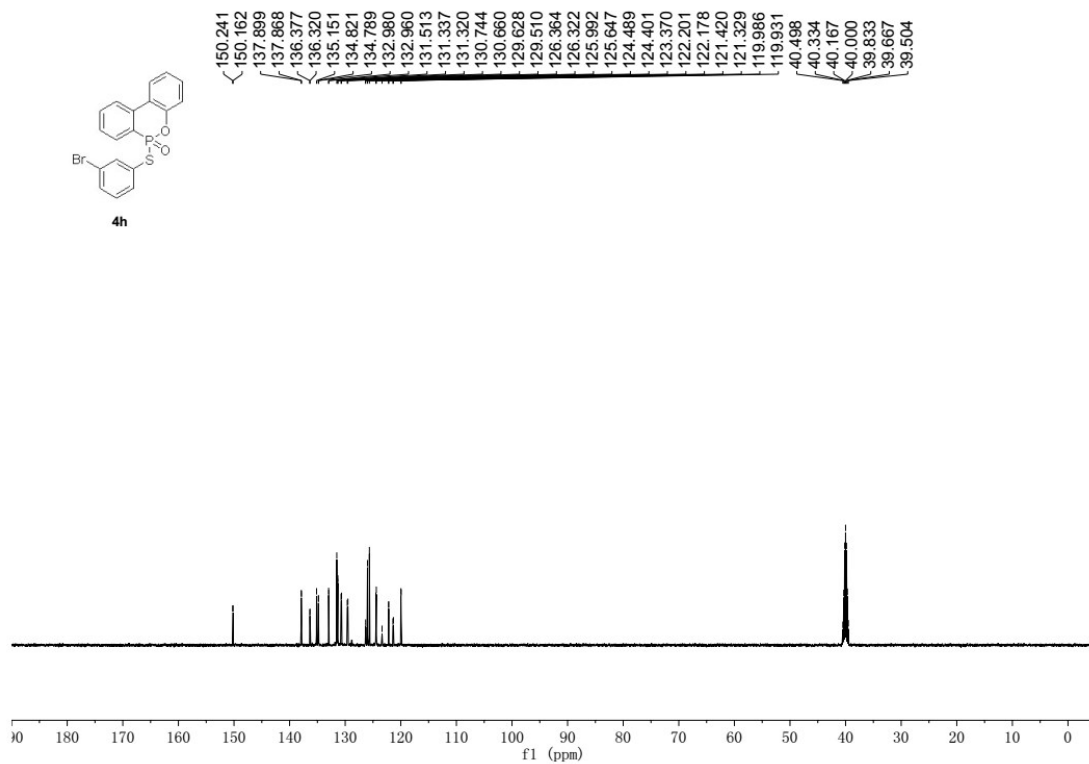

<sup>13</sup>C NMR spectrum of compound **4h**

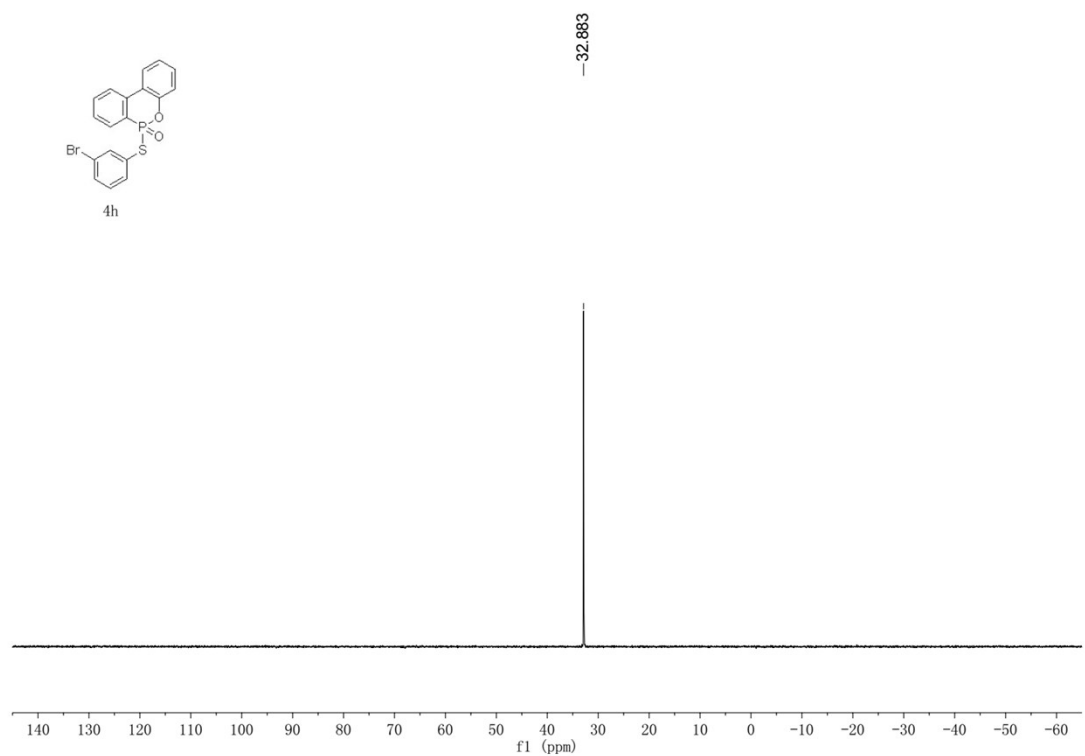

<sup>31</sup>P NMR spectrum of compound **4h**

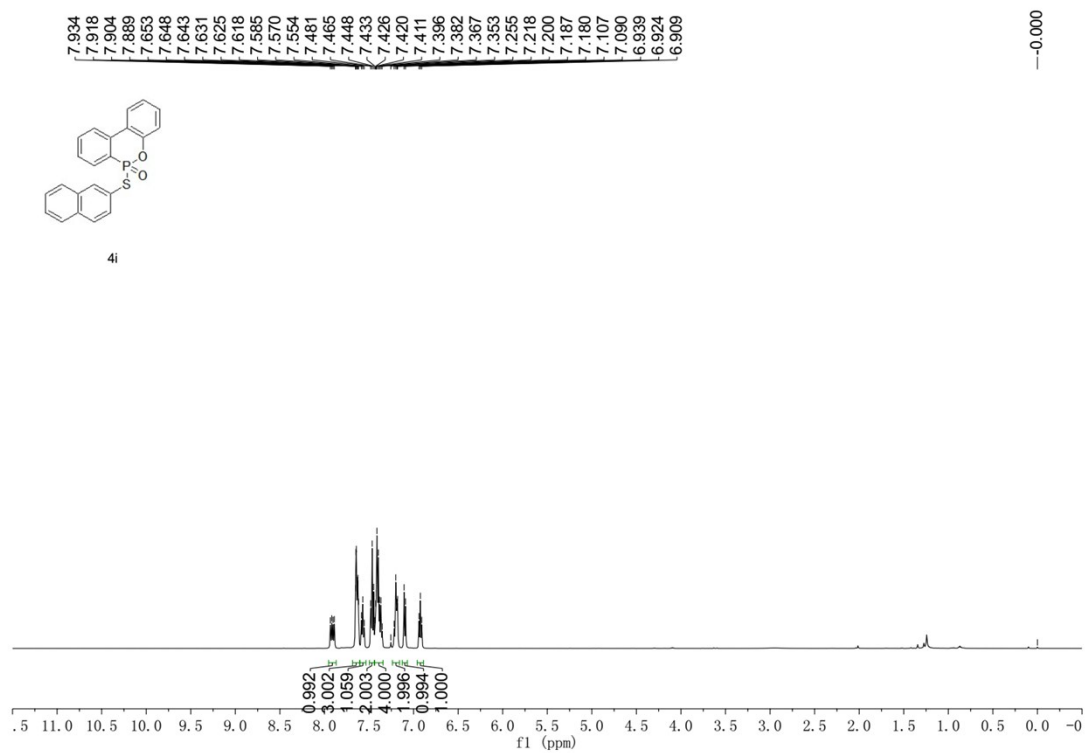

<sup>1</sup>H NMR spectrum of compound **4i**

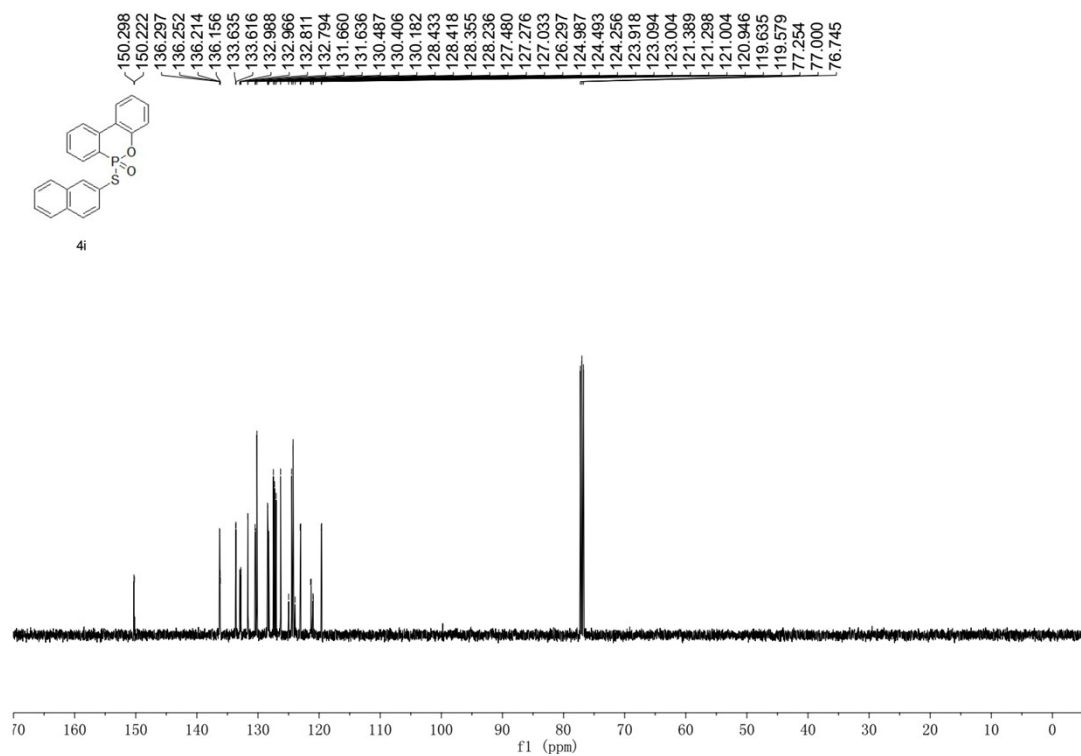

$^{13}\text{C}$  NMR spectrum of compound **4i**

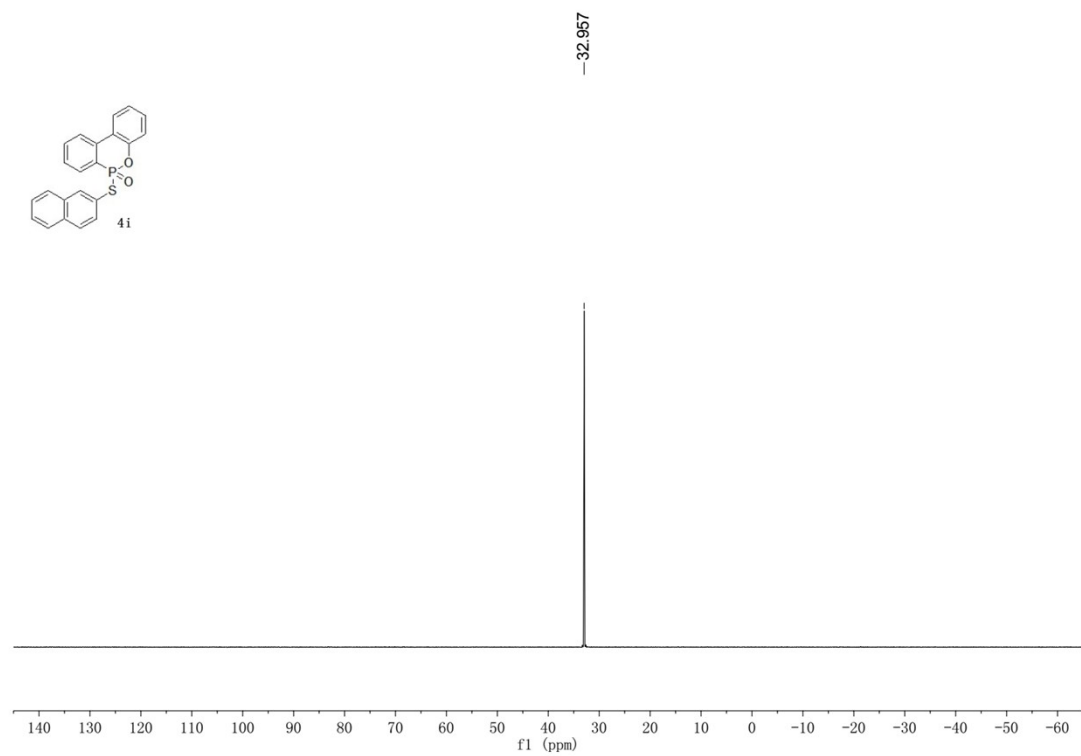

$^{31}\text{P}$  NMR spectrum of compound **4i**

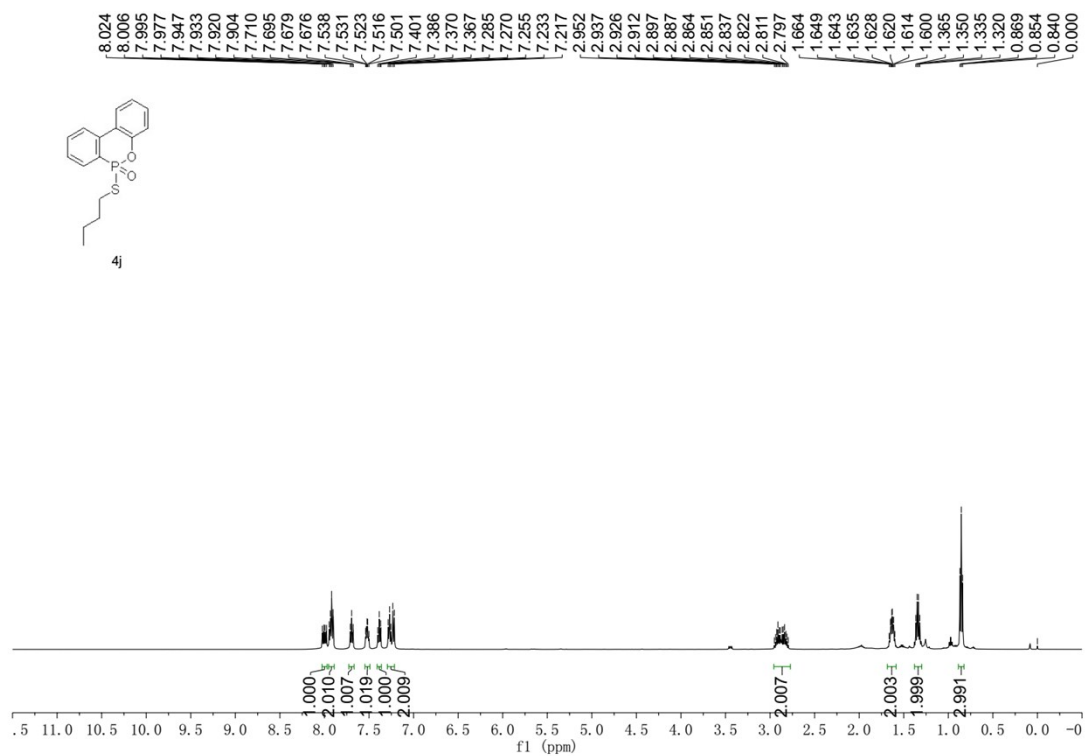

<sup>1</sup>H NMR spectrum of compound **4j**

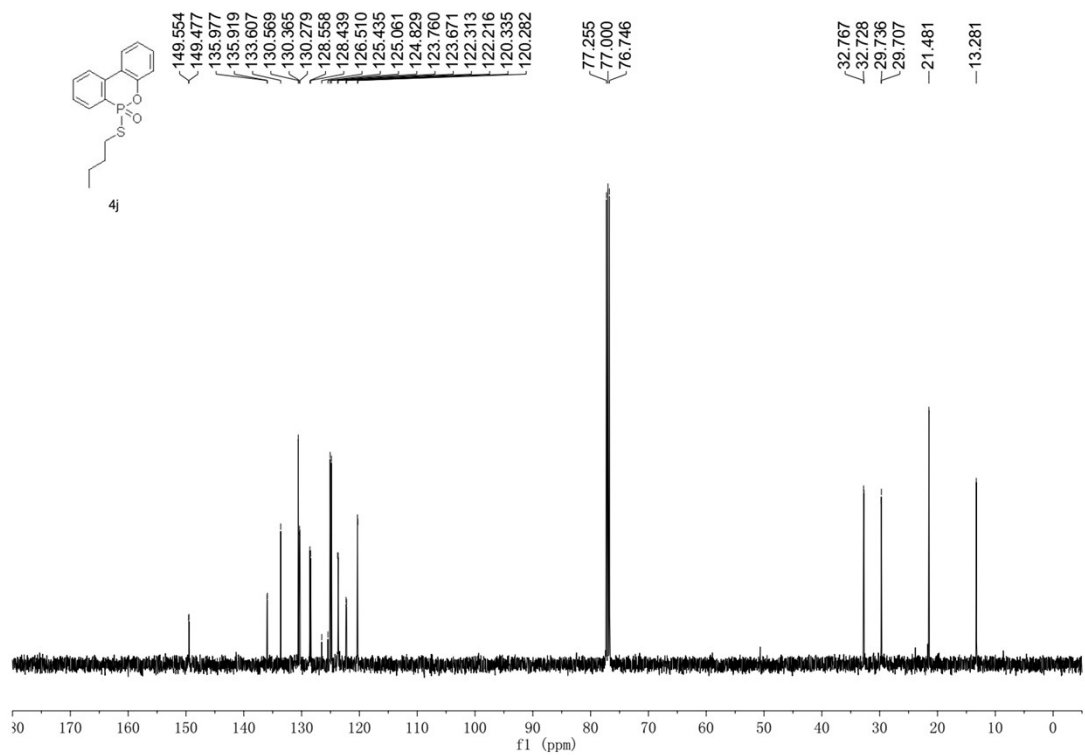

<sup>13</sup>C NMR spectrum of compound **4j**

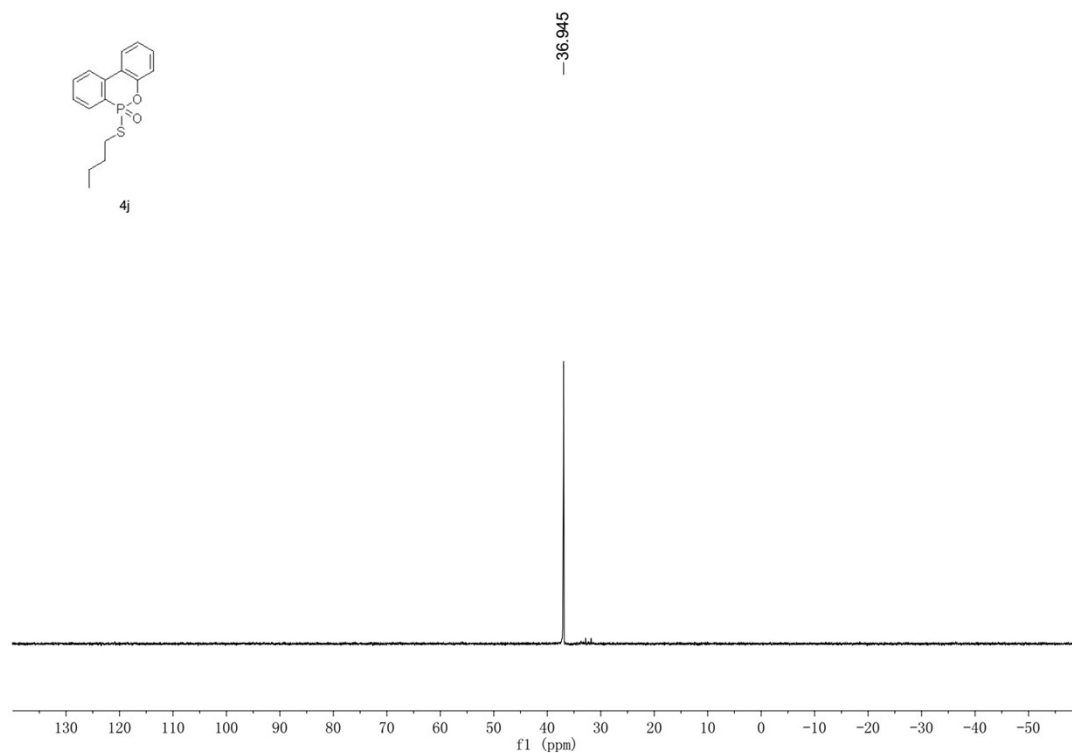

$^{31}\text{P}$  NMR spectrum of compound **4j**

## 6. Crystallographic detail of **3k** and **4i**

Detector with graphite-monochromated MoK $\alpha$  radiation ( $\lambda = 0.71073 \text{ \AA}$ ) at 293 K. All of the data were corrected for absorption effects using the multi-scan technique. The structures were solved by direct methods, expanded by difference Fourier syntheses and refined by full matrix least-squares on F2 using Bruker SHELXTL (Version 6.10) program package. Non-H atoms were refined anisotropically unless otherwise stated. Hydrogen atoms were introduced at their geometric positions and refined as riding atoms unless otherwise stated.

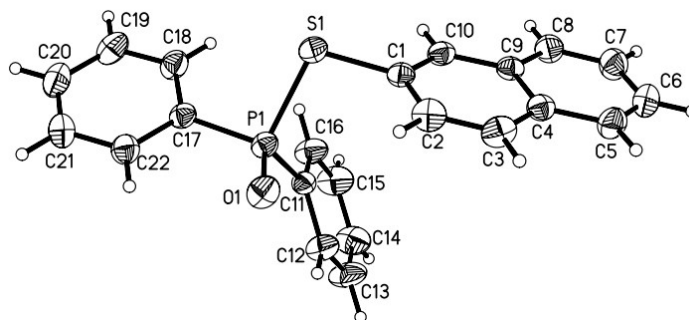

X-ray crystal structure of **3k**

**Crystal data for 3k:** C<sub>22</sub>H<sub>17</sub>OPS, M = 360.39, monoclinic, space group P2(1)/c,

colorless plate,  $a = 10.8152(5)$ ,  $b = 8.5569(3)$ ,  $c = 20.0431(9)$  Å,  $\beta = 95.275(4)^\circ$ ,  $V = 1847.02(14)$  Å<sup>3</sup>,  $Z = 4$ ,  $D_c = 1.296$  g cm<sup>-3</sup>,  $\mu(\text{Mo-K}\alpha) = 0.268$  mm<sup>-1</sup>,  $T = 293(2)$  K. 3241 unique reflections [ $R(\text{int}) = 0.0191$ ]. Final  $R$  [3241 with  $I > 2\sigma(I)$ ] = 0.0418,  $wR2$  (all data) = 0.1450. CCDC reference numbers 1513070.
